# Supplementary material for: Identification of nuclear pore proteins at plasmodesmata: potential role in intercellular transport?
Source: bioRxiv preprint, doi:10.1101/2024.09.02.610746, version 5 (2026-04-15)
Supplement: file S1 [file 610746_file04.xlsx]

## Sheet: results_with_index_and_genes3
#	Gene	Gene Name	Gene description	max #FG in 200 window	#FG	Length	#GLFG	#xFxFG	Start of Max Window
8333	Pp3c26_7720V3.1	Pp3c26_7720	af411838_1 nucleoporin precoz:nucleoporin 98	28	65	1928	2	0	0
8334	Pp3c26_7720V3.2	Pp3c26_7720	af411838_1 nucleoporin precoz:nucleoporin 98	28	65	1928	2	0	0
19594	Pp3c3_17910V3.6	Pp3c3_17910	nucleoporin 98	28	66	984	2	0	40
19595	Pp3c3_17910V3.5	Pp3c3_17910	nucleoporin 98	28	68	999	2	0	40
19596	Pp3c3_17910V3.1	Pp3c3_17910	nucleoporin 98	28	68	999	2	0	40
19597	Pp3c3_17910V3.4	Pp3c3_17910	nucleoporin 98	28	68	999	2	0	40
19598	Pp3c3_17910V3.3	Pp3c3_17910	nucleoporin 98	28	68	999	2	0	40
19599	Pp3c3_17910V3.2	Pp3c3_17910	nucleoporin 98	28	68	999	2	0	40
19600	Pp3c3_17910V3.7	Pp3c3_17910	nucleoporin 98	28	68	999	2	0	40
14338	Pp3c3_28570V3.1	Pp3c3_28570	hypothetical protein [Dictyostelium discoideum]	25	58	1526	0	9	994
14339	Pp3c3_28570V3.5	Pp3c3_28570	hypothetical protein [Dictyostelium discoideum]	25	58	1526	0	9	994
14340	Pp3c3_28570V3.4	Pp3c3_28570	hypothetical protein [Dictyostelium discoideum]	25	58	1407	0	9	875
14341	Pp3c3_28570V3.2	Pp3c3_28570	hypothetical protein [Dictyostelium discoideum]	25	58	1529	0	9	997
14342	Pp3c3_28570V3.3	Pp3c3_28570	hypothetical protein [Dictyostelium discoideum]	25	58	1404	0	9	872
39646	Pp3c26_7680V3.1	Pp3c26_7680	N/A	25	32	898	2	0	48
39647	Pp3c26_7680V3.2	Pp3c26_7680	N/A	25	35	1013	2	0	160
38349	Pp3c8_3950V3.1	Pp3c8_3950	N/A	21	44	1451	0	7	1024
38350	Pp3c8_3950V3.2	Pp3c8_3950	N/A	21	44	1451	0	7	1024
38896	PAC:32905933.CDS.1	Pp3c17_4470	loh11cr2a-prov; loh11cr2a-prov protein [Xenopus tropicalis]	20	23	1068	0	0	725
23685	Pp3c15_14630V3.3	Pp3c15_14630	structural constituent of nuclear	19	33	751	1	7	5
23686	Pp3c15_14630V3.2	Pp3c15_14630	structural constituent of nuclear	19	33	751	1	7	5
23687	Pp3c15_14630V3.1	Pp3c15_14630	structural constituent of nuclear	19	33	751	1	7	5
70305	Pp3c14_14130V3.3	Pp3c14_14130	F3I6.25; expressed protein [Arabidopsis thaliana]	17	17	486	5	0	0
70306	Pp3c14_14130V3.1	Pp3c14_14130	F3I6.25; expressed protein [Arabidopsis thaliana]	17	17	486	5	0	0
38895	Pp3c17_4470V3.1	Pp3c17_4470	loh11cr2a-prov; loh11cr2a-prov protein [Xenopus tropicalis]	16	18	1016	0	0	673
70307	Pp3c14_14130V3.2	Pp3c14_14130	F3I6.25; expressed protein [Arabidopsis thaliana]	15	15	453	5	0	0
70308	Pp3c14_14130V3.4	Pp3c14_14130	F3I6.25; expressed protein [Arabidopsis thaliana]	15	15	324	5	0	0
10195	Pp3c24_6760V3.5	Pp3c24_6760	N/A	14	15	528	6	0	285
10196	Pp3c24_6760V3.3	Pp3c24_6760	N/A	14	15	528	6	0	285
10197	Pp3c24_6760V3.1	Pp3c24_6760	N/A	14	15	528	6	0	285
10198	Pp3c24_6760V3.4	Pp3c24_6760	N/A	14	15	528	6	0	285
40092	Pp3c13_12950V3.1	Pp3c13_12950	N/A	14	25	1697	2	1	1389
40093	Pp3c13_12950V3.3	Pp3c13_12950	N/A	14	24	1641	2	1	1333
40094	Pp3c13_12950V3.2	Pp3c13_12950	N/A	14	25	1697	2	1	1389
30725	Pp3c10_15930V3.1	Pp3c10_15930	F3I6.25; expressed protein	13	13	463	2	0	0
71180	Pp3c10_15937V3.1	Pp3c10_15937	N/A	13	13	463	2	0	0
61465	Pp3c7_12210V3.1	Pp3c7_12210	N/A	12	15	384	0	1	116
61466	Pp3c7_12210V3.2	Pp3c7_12210	N/A	12	15	436	0	1	116
10194	Pp3c24_6760V3.2	Pp3c24_6760	N/A	11	11	457	6	0	232
36303	Pp3c13_24530V3.6	Pp3c13_24530	F8K7.4; calcium-binding EF hand family protein	10	16	1250	0	0	926
36304	Pp3c13_24530V3.3	Pp3c13_24530	F8K7.4; calcium-binding EF hand family protein	10	16	1250	0	0	926
36307	Pp3c13_24530V3.1	Pp3c13_24530	F8K7.4; calcium-binding EF hand family protein	10	16	1250	0	0	926
46434	Pp3c26_230V3.1	Pp3c26_230	calcium ion binding	9	15	1259	0	0	936
46435	Pp3c26_230V3.3	Pp3c26_230	calcium ion binding	9	15	1259	0	0	936
46436	Pp3c26_230V3.2	Pp3c26_230	calcium ion binding	9	15	1259	0	0	936
48551	Pp3c13_15260V3.1	Pp3c13_15260	N/A	9	28	715	0	0	42
50831	Pp3c17_9989V3.1	Pp3c17_9989	N/A	9	25	734	0	0	240
1354	Pp3c23_9370V3.3	Pp3c23_9370	upf1 regulator of nonsense transcripts homolog	7	10	1278	0	1	974
1355	Pp3c23_9370V3.2	Pp3c23_9370	upf1 regulator of nonsense transcripts homolog	7	10	1278	0	1	974
8475	Pp3c13_13860V3.3	Pp3c13_13860	heterogeneous nuclear ribonucleoprotein 27c	7	9	456	0	0	185
8476	Pp3c13_13860V3.9	Pp3c13_13860	heterogeneous nuclear ribonucleoprotein 27c	7	9	456	0	0	185
8477	Pp3c13_13860V3.7	Pp3c13_13860	heterogeneous nuclear ribonucleoprotein 27c	7	9	434	0	0	163
8479	Pp3c13_13860V3.5	Pp3c13_13860	heterogeneous nuclear ribonucleoprotein 27c	7	9	456	0	0	185
8480	Pp3c13_13860V3.2	Pp3c13_13860	heterogeneous nuclear ribonucleoprotein 27c	7	9	456	0	0	185
8481	Pp3c13_13860V3.4	Pp3c13_13860	heterogeneous nuclear ribonucleoprotein 27c	7	9	456	0	0	185
8482	Pp3c13_13860V3.6	Pp3c13_13860	heterogeneous nuclear ribonucleoprotein 27c	7	9	456	0	0	185
8483	Pp3c13_13860V3.1	Pp3c13_13860	heterogeneous nuclear ribonucleoprotein 27c	7	9	456	0	0	185
14684	PAC:32927388.CDS.1	Pp3c15_3820	T13C7.15; DNAJ heat shock family protein	7	7	353	0	0	0
14685	PAC:32927390.CDS.1	Pp3c15_3820	T13C7.15; DNAJ heat shock family protein	7	7	353	0	0	0
14686	PAC:32927389.CDS.1	Pp3c15_3820	T13C7.15; DNAJ heat shock family protein	7	7	353	0	0	0
16661	Pp3c22_8260V3.2	Pp3c22_8260	T18B16.170; proline-rich family protein [Arabidopsis thaliana]	7	7	244	0	0	40
16662	Pp3c22_8260V3.3	Pp3c22_8260	T18B16.170; proline-rich family protein [Arabidopsis thaliana]	7	7	234	0	0	30
16663	Pp3c22_8260V3.1	Pp3c22_8260	T18B16.170; proline-rich family protein [Arabidopsis thaliana]	7	7	244	0	0	40
19071	Pp3c3_1164V3.1	Pp3c3_1164	N/A	7	7	321	1	0	0
33377	Pp3c12_4420V3.2	Pp3c12_4420	N/A	7	9	1166	0	0	403
33378	Pp3c12_4420V3.4	Pp3c12_4420	N/A	7	9	1166	0	0	403
33379	Pp3c12_4420V3.1	Pp3c12_4420	N/A	7	9	1166	0	0	403
33380	Pp3c12_4420V3.3	Pp3c12_4420	N/A	7	9	1166	0	0	403
41056	Pp3c10_21630V3.1	Pp3c10_21630	F14B2.10; epsin N-terminal homology (ENTH) domain-containing protein [Arabidopsis thaliana]	7	8	810	0	0	383
41057	Pp3c10_21630V3.3	Pp3c10_21630	F14B2.10; epsin N-terminal homology (ENTH) domain-containing protein [Arabidopsis thaliana]	7	8	810	0	0	383
41058	Pp3c10_21630V3.2	Pp3c10_21630	F14B2.10; epsin N-terminal homology (ENTH) domain-containing protein [Arabidopsis thaliana]	7	8	839	0	0	383
44130	Pp3c16_10390V3.1	Pp3c16_10390	cdp-diacylglycerol synthetase	7	7	559	0	0	291
44131	Pp3c16_10390V3.2	Pp3c16_10390	cdp-diacylglycerol synthetase	7	7	559	0	0	291
63790	Pp3c13_1670V3.10	Pp3c13_1670	T12H17.1; glycine-rich protein [Arabidopsis thaliana]	7	7	306	1	0	0
63791	Pp3c13_1670V3.5	Pp3c13_1670	T12H17.1; glycine-rich protein [Arabidopsis thaliana]	7	7	305	1	0	0
63792	Pp3c13_1670V3.14	Pp3c13_1670	T12H17.1; glycine-rich protein [Arabidopsis thaliana]	7	7	320	1	0	0
63793	Pp3c13_1670V3.2	Pp3c13_1670	T12H17.1; glycine-rich protein [Arabidopsis thaliana]	7	7	305	1	0	0
63794	Pp3c13_1670V3.11	Pp3c13_1670	T12H17.1; glycine-rich protein [Arabidopsis thaliana]	7	7	306	1	0	0
63795	Pp3c13_1670V3.18	Pp3c13_1670	T12H17.1; glycine-rich protein [Arabidopsis thaliana]	7	7	319	1	0	0
63796	Pp3c13_1670V3.12	Pp3c13_1670	T12H17.1; glycine-rich protein [Arabidopsis thaliana]	7	7	306	1	0	0
63797	Pp3c13_1670V3.6	Pp3c13_1670	T12H17.1; glycine-rich protein [Arabidopsis thaliana]	7	7	305	1	0	0
63798	Pp3c13_1670V3.13	Pp3c13_1670	T12H17.1; glycine-rich protein [Arabidopsis thaliana]	7	7	320	1	0	0
63800	Pp3c13_1670V3.1	Pp3c13_1670	T12H17.1; glycine-rich protein [Arabidopsis thaliana]	7	7	306	1	0	0
63801	Pp3c13_1670V3.9	Pp3c13_1670	T12H17.1; glycine-rich protein [Arabidopsis thaliana]	7	7	306	1	0	0
63802	Pp3c13_1670V3.3	Pp3c13_1670	T12H17.1; glycine-rich protein [Arabidopsis thaliana]	7	7	305	1	0	0
63803	Pp3c13_1670V3.16	Pp3c13_1670	T12H17.1; glycine-rich protein [Arabidopsis thaliana]	7	7	320	1	0	0
63804	Pp3c13_1670V3.19	Pp3c13_1670	T12H17.1; glycine-rich protein [Arabidopsis thaliana]	7	7	319	1	0	0
63805	Pp3c13_1670V3.4	Pp3c13_1670	T12H17.1; glycine-rich protein [Arabidopsis thaliana]	7	7	305	1	0	0
63806	Pp3c13_1670V3.20	Pp3c13_1670	T12H17.1; glycine-rich protein [Arabidopsis thaliana]	7	7	319	1	0	0
63807	Pp3c13_1670V3.15	Pp3c13_1670	T12H17.1; glycine-rich protein [Arabidopsis thaliana]	7	7	320	1	0	0
63808	Pp3c13_1670V3.17	Pp3c13_1670	T12H17.1; glycine-rich protein [Arabidopsis thaliana]	7	7	319	1	0	0
63809	Pp3c13_1670V3.8	Pp3c13_1670	T12H17.1; glycine-rich protein [Arabidopsis thaliana]	7	7	306	1	0	0
66034	PAC:32980650.CDS.1	Pp3c25_6710	f-box protein	7	9	463	0	0	153
66035	PAC:32980649.CDS.1	Pp3c25_6710	f-box protein	7	9	474	0	0	164
76906	Pp3c1_14120V3.1	Pp3c1_14120	calcium ion binding	7	11	1094	0	0	826
76907	Pp3c1_14120V3.2	Pp3c1_14120	calcium ion binding	7	11	1094	0	0	826
81817	Pp3c2_27990V3.5	Pp3c2_27990	calcium ion binding	7	11	1005	0	0	735
81818	Pp3c2_27990V3.2	Pp3c2_27990	calcium ion binding	7	11	991	0	0	722
81819	Pp3c2_27990V3.6	Pp3c2_27990	calcium ion binding	7	11	992	0	0	722
81820	Pp3c2_27990V3.1	Pp3c2_27990	calcium ion binding	7	11	1005	0	0	735
81821	Pp3c2_27990V3.3	Pp3c2_27990	calcium ion binding	7	11	1004	0	0	735
81822	Pp3c2_27990V3.4	Pp3c2_27990	calcium ion binding	7	11	992	0	0	722
81823	Pp3c2_27990V3.7	Pp3c2_27990	calcium ion binding	7	11	1005	0	0	735
82629	Pp3c20_14730V3.1	Pp3c20_14730	subfamily member 9	7	7	603	0	1	4
82630	Pp3c20_14730V3.2	Pp3c20_14730	subfamily member 9	7	7	603	0	1	4
83187	Pp3c11_25340V3.3	Pp3c11_25340	rna binding	7	8	642	0	0	329
83188	Pp3c11_25340V3.2	Pp3c11_25340	rna binding	7	7	555	0	0	242
83189	Pp3c11_25340V3.1	Pp3c11_25340	rna binding	7	8	642	0	0	329
1202	Pp3c22_23080V3.1	Pp3c22_23080	amidase family protein	6	7	541	0	1	20
1203	Pp3c22_23080V3.2	Pp3c22_23080	amidase family protein	6	7	541	0	1	20
2224	Pp3c24_6070V3.1	Pp3c24_6070	amino acid permease	6	6	491	0	0	139
6319	Pp3c2_15020V3.4	Pp3c2_15020	CDC2+/CDC28-related protein kinase R2	6	6	437	0	0	170
6320	Pp3c2_15020V3.3	Pp3c2_15020	CDC2+/CDC28-related protein kinase R2	6	6	437	0	0	170
6321	Pp3c2_15020V3.2	Pp3c2_15020	CDC2+/CDC28-related protein kinase R2	6	6	437	0	0	170
6322	Pp3c2_15020V3.1	Pp3c2_15020	CDC2+/CDC28-related protein kinase R2	6	6	437	0	0	170
12145	Pp3c21_15880V3.1	Pp3c21_15880	amidase family protein	6	6	357	0	0	31
12146	Pp3c21_15880V3.2	Pp3c21_15880	amidase family protein	6	6	551	0	0	31
13335	PAC:32967187.CDS.1	Pp3c1_22710	at5g27210 t21b4_120	6	7	304	0	1	50
13336	PAC:32967189.CDS.1	Pp3c1_22710	at5g27210 t21b4_120	6	7	304	0	1	50
13337	PAC:32967188.CDS.1	Pp3c1_22710	at5g27210 t21b4_120	6	7	304	0	1	50
14779	Pp3c3_8560V3.1	Pp3c3_8560	endosomal p24a protein	6	8	642	0	0	335
14780	Pp3c3_8560V3.2	Pp3c3_8560	endosomal p24a protein	6	8	642	0	0	335
15719	Pp3c16_12990V3.2	Pp3c16_12990	F26B6.10; protein kinase family protein	6	6	409	0	0	103
15720	Pp3c16_12990V3.1	Pp3c16_12990	F26B6.10; protein kinase family protein	6	6	409	0	0	103
17324	Pp3c23_10950V3.2	Pp3c23_10950	endosomal p24a protein	6	7	634	0	0	327
17325	Pp3c23_10950V3.1	Pp3c23_10950	endosomal p24a protein	6	7	634	0	0	327
20977	Pp3c8_17020V3.2	Pp3c8_17020	white-brown-complex abc transporter family	6	8	721	0	1	110
24381	Pp3c9_9170V3.2	Pp3c9_9170	hypothetical protein [Oryza sativa (japonica cultivar-group)]	6	7	961	0	0	398
24382	Pp3c9_9170V3.6	Pp3c9_9170	hypothetical protein [Oryza sativa (japonica cultivar-group)]	6	7	888	0	0	324
24383	Pp3c9_9170V3.3	Pp3c9_9170	hypothetical protein [Oryza sativa (japonica cultivar-group)]	6	7	887	0	0	324
24384	Pp3c9_9170V3.1	Pp3c9_9170	hypothetical protein [Oryza sativa (japonica cultivar-group)]	6	7	962	0	0	399
24385	Pp3c9_9170V3.9	Pp3c9_9170	hypothetical protein [Oryza sativa (japonica cultivar-group)]	6	7	961	0	0	398
24386	Pp3c9_9170V3.4	Pp3c9_9170	hypothetical protein [Oryza sativa (japonica cultivar-group)]	6	7	887	0	0	324
24387	Pp3c9_9170V3.8	Pp3c9_9170	hypothetical protein [Oryza sativa (japonica cultivar-group)]	6	7	886	0	0	322
24388	Pp3c9_9170V3.7	Pp3c9_9170	hypothetical protein [Oryza sativa (japonica cultivar-group)]	6	7	885	0	0	322
24389	Pp3c9_9170V3.5	Pp3c9_9170	hypothetical protein [Oryza sativa (japonica cultivar-group)]	6	7	888	0	0	324
27372	Pp3c20_8320V3.5	Pp3c20_8320	heat shock protein chaperone	6	6	460	0	1	7
27373	Pp3c20_8320V3.1	Pp3c20_8320	heat shock protein chaperone	6	6	458	0	1	7
27374	Pp3c20_8320V3.7	Pp3c20_8320	heat shock protein chaperone	6	6	467	0	1	14
27375	Pp3c20_8320V3.11	Pp3c20_8320	heat shock protein chaperone	6	6	372	0	1	0
27376	Pp3c20_8320V3.2	Pp3c20_8320	heat shock protein chaperone	6	6	465	0	1	14
27377	Pp3c20_8320V3.9	Pp3c20_8320	heat shock protein chaperone	6	6	392	0	1	7
27378	Pp3c20_8320V3.12	Pp3c20_8320	heat shock protein chaperone	6	6	467	0	1	14
27379	Pp3c20_8320V3.8	Pp3c20_8320	heat shock protein chaperone	6	6	392	0	1	7
27380	Pp3c20_8320V3.3	Pp3c20_8320	heat shock protein chaperone	6	6	426	0	1	0
27381	Pp3c20_8320V3.6	Pp3c20_8320	heat shock protein chaperone	6	6	467	0	1	14
27382	Pp3c20_8320V3.10	Pp3c20_8320	heat shock protein chaperone	6	6	399	0	1	14
27383	Pp3c20_8320V3.4	Pp3c20_8320	heat shock protein chaperone	6	6	460	0	1	7
31099	Pp3c11_18522V3.2	Pp3c11_18522	N/A	6	12	2603	0	1	352
31100	Pp3c11_18522V3.1	Pp3c11_18522	N/A	6	12	2626	0	1	352
34898	PAC:32983928.CDS.1	Pp3c16_19240	F5D21.4; F-box family protein [Arabidopsis thaliana]	6	9	473	0	0	163
34899	PAC:32983927.CDS.1	Pp3c16_19240	F5D21.4; F-box family protein [Arabidopsis thaliana]	6	9	473	0	0	163
34900	PAC:32983929.CDS.1	Pp3c16_19240	F5D21.4; F-box family protein [Arabidopsis thaliana]	6	9	473	0	0	163
35469	PAC:32974088.CDS.1	Pp3c12_2810	N/A	6	6	352	0	0	0
35470	Pp3c12_2810V3.1	Pp3c12_2810	N/A	6	6	313	0	0	0
36308	Pp3c13_24530V3.2	Pp3c13_24530	F8K7.4; calcium-binding EF hand family protein	6	8	1142	0	0	877
49089	PAC:32958140.CDS.1	Pp3c11_2191	N/A	6	7	242	0	0	0
49956	Pp3c20_21860V3.2	Pp3c20_21860	N/A	6	8	836	0	0	376
49957	Pp3c20_21860V3.3	Pp3c20_21860	N/A	6	8	835	0	0	375
49958	Pp3c20_21860V3.1	Pp3c20_21860	N/A	6	8	835	0	0	375
51653	Pp3c20_16510V3.1	Pp3c20_16510	upf1 regulator of nonsense transcripts homolog	6	10	1316	0	1	1012
51654	Pp3c20_16510V3.2	Pp3c20_16510	upf1 regulator of nonsense transcripts homolog	6	10	1316	0	1	1012
51659	Pp3c1_8580V3.1	Pp3c1_8580	anion exchanger family protein	6	7	664	0	0	26
51660	Pp3c1_8580V3.6	Pp3c1_8580	anion exchanger family protein	6	7	664	0	0	26
51661	Pp3c1_8580V3.8	Pp3c1_8580	anion exchanger family protein	6	7	619	0	0	26
51662	Pp3c1_8580V3.4	Pp3c1_8580	anion exchanger family protein	6	7	664	0	0	26
51663	Pp3c1_8580V3.2	Pp3c1_8580	anion exchanger family protein	6	7	664	0	0	26
51664	Pp3c1_8580V3.7	Pp3c1_8580	anion exchanger family protein	6	7	619	0	0	26
51665	Pp3c1_8580V3.5	Pp3c1_8580	anion exchanger family protein	6	7	664	0	0	26
51666	Pp3c1_8580V3.3	Pp3c1_8580	anion exchanger family protein	6	7	664	0	0	26
52525	PAC:32963866.CDS.1	Pp3c8_12211	N/A	6	6	241	0	0	3
54206	Pp3c12_23930V3.3	Pp3c12_23930	nucleolin protein:28 kda ribonucleoprotein	6	6	580	0	0	342
54207	Pp3c12_23930V3.1	Pp3c12_23930	nucleolin protein:28 kda ribonucleoprotein	6	6	580	0	0	342
54208	Pp3c12_23930V3.2	Pp3c12_23930	nucleolin protein:28 kda ribonucleoprotein	6	6	580	0	0	342
56578	Pp3c7_7090V3.1	Pp3c7_7090	rna binding	6	6	619	0	0	307
56579	Pp3c7_7090V3.2	Pp3c7_7090	rna binding	6	6	619	0	0	307
58892	Pp3c5_28430V3.1	Pp3c5_28430	snornp protein	6	6	213	0	0	0
58893	Pp3c5_28430V3.2	Pp3c5_28430	snornp protein	6	6	213	0	0	0
61467	Pp3c7_12210V3.3	Pp3c7_12210	N/A	6	7	252	0	1	11
61855	PAC:32908360.CDS.1	Pp3c17_2340	T13C7.15; DNAJ heat shock family protein	6	6	352	0	0	0
61856	PAC:32908362.CDS.1	Pp3c17_2340	T13C7.15; DNAJ heat shock family protein	6	6	352	0	0	0
61857	PAC:32908361.CDS.1	Pp3c17_2340	T13C7.15; DNAJ heat shock family protein	6	6	352	0	0	0
64372	Pp3c24_7350V3.1	Pp3c24_7350	MMM17.22; endomembrane protein 70, putative [Arabidopsis thaliana]	6	7	634	0	0	327
64373	Pp3c24_7350V3.3	Pp3c24_7350	MMM17.22; endomembrane protein 70, putative [Arabidopsis thaliana]	6	7	634	0	0	327
64374	Pp3c24_7350V3.2	Pp3c24_7350	MMM17.22; endomembrane protein 70, putative [Arabidopsis thaliana]	6	7	634	0	0	327
64375	Pp3c24_7350V3.4	Pp3c24_7350	MMM17.22; endomembrane protein 70, putative [Arabidopsis thaliana]	6	7	508	0	0	201
65902	Pp3c11_18520V3.1	Pp3c11_18520	Immediate-early protein [Herpesvirus saimiri (STRAIN 11)]	6	12	2653	0	1	352
69190	Pp3c5_1950V3.1	Pp3c5_1950	wall-associated kinase	6	6	541	0	0	239
69191	Pp3c5_1950V3.2	Pp3c5_1950	wall-associated kinase	6	6	541	0	0	239
69192	Pp3c5_1950V3.3	Pp3c5_1950	wall-associated kinase	6	6	541	0	0	239
71999	Pp3c2_14570V3.1	Pp3c2_14570	F12C20.4; ubiquitin-associated (UBA)/TS-N domain-containing protein [Arabidopsis thaliana]	6	6	811	0	0	559
72000	Pp3c2_14570V3.2	Pp3c2_14570	F12C20.4; ubiquitin-associated (UBA)/TS-N domain-containing protein [Arabidopsis thaliana]	6	6	811	0	0	559
73280	Pp3c24_20780V3.2	Pp3c24_20780	integral membrane protein	6	6	493	0	0	0
73281	Pp3c24_20780V3.1	Pp3c24_20780	integral membrane protein	6	6	493	0	0	0
77551	PAC:32907276.CDS.1	Pp3c17_2260	T13C7.15; DNAJ heat shock family protein	6	6	349	0	0	0
77552	PAC:32907277.CDS.1	Pp3c17_2260	T13C7.15; DNAJ heat shock family protein	6	6	349	0	0	0
79561	Pp3c1_2210V3.4	Pp3c1_2210	vacuolar h+-translocating inorganic pyrophosphatase	6	8	715	0	0	201
79562	Pp3c1_2210V3.1	Pp3c1_2210	vacuolar h+-translocating inorganic pyrophosphatase	6	8	715	0	0	201
79564	Pp3c1_2210V3.2	Pp3c1_2210	vacuolar h+-translocating inorganic pyrophosphatase	6	9	594	0	0	201
79838	Pp3c3_6080V3.2	Pp3c3_6080	N/A	6	6	512	1	0	164
79839	PAC:32943125.CDS.1	Pp3c3_6080	N/A	6	6	479	1	0	131
79840	PAC:32943124.CDS.1	Pp3c3_6080	N/A	6	6	479	1	0	131
2269	Pp3c23_2850V3.2	Pp3c23_2850	peptidyl-prolyl cis-trans isomerase	5	5	252	1	0	17
2271	Pp3c23_2850V3.7	Pp3c23_2850	peptidyl-prolyl cis-trans isomerase	5	5	253	1	0	18
2273	Pp3c23_2850V3.9	Pp3c23_2850	peptidyl-prolyl cis-trans isomerase	5	5	248	1	0	13
2275	Pp3c23_2850V3.1	Pp3c23_2850	peptidyl-prolyl cis-trans isomerase	5	5	248	1	0	13
2276	Pp3c23_2850V3.5	Pp3c23_2850	peptidyl-prolyl cis-trans isomerase	5	5	247	1	0	12
2277	Pp3c23_2850V3.6	Pp3c23_2850	peptidyl-prolyl cis-trans isomerase	5	5	249	1	0	14
2805	Pp3c20_15760V3.2	Pp3c20_15760	protein fun34	5	5	230	0	0	0
2806	Pp3c20_15760V3.5	Pp3c20_15760	protein fun34	5	5	230	0	0	0
2807	Pp3c20_15760V3.4	Pp3c20_15760	protein fun34	5	5	230	0	0	0
2808	Pp3c20_15760V3.1	Pp3c20_15760	protein fun34	5	5	230	0	0	0
2809	Pp3c20_15760V3.3	Pp3c20_15760	protein fun34	5	5	230	0	0	0
4120	Pp3c26_10750V3.1	Pp3c26_10750	vacuolar proton	5	8	817	0	1	390
4121	Pp3c26_10750V3.2	Pp3c26_10750	vacuolar proton	5	8	817	0	1	390
4233	Pp3c3_17370V3.4	Pp3c3_17370	heterogeneous nuclear ribonucleoprotein 27c	5	7	456	0	0	37
4234	Pp3c3_17370V3.2	Pp3c3_17370	heterogeneous nuclear ribonucleoprotein 27c	5	7	456	0	0	37
4235	Pp3c3_17370V3.3	Pp3c3_17370	heterogeneous nuclear ribonucleoprotein 27c	5	7	456	0	0	37
4236	Pp3c3_17370V3.1	Pp3c3_17370	heterogeneous nuclear ribonucleoprotein 27c	5	7	456	0	0	37
4861	Pp3c23_5510V3.2	Pp3c23_5510	N/A	5	9	1439	0	1	1236
4862	Pp3c23_5510V3.1	Pp3c23_5510	N/A	5	9	1416	0	1	1213
8478	Pp3c13_13860V3.8	Pp3c13_13860	heterogeneous nuclear ribonucleoprotein 27c	5	7	340	0	0	37
8854	Pp3c9_24360V3.2	Pp3c9_24360	dual specificity protein	5	5	262	0	2	45
8855	Pp3c9_24360V3.3	Pp3c9_24360	dual specificity protein	5	5	262	0	2	45
8856	Pp3c9_24360V3.1	Pp3c9_24360	dual specificity protein	5	5	262	0	2	45
9619	Pp3c26_12400V3.3	Pp3c26_12400	nucleic acid binding	5	6	411	0	0	103
9620	Pp3c26_12400V3.1	Pp3c26_12400	nucleic acid binding	5	6	411	0	0	103
9621	Pp3c26_12400V3.2	Pp3c26_12400	nucleic acid binding	5	6	407	0	0	99
11467	Pp3c1_36080V3.2	Pp3c1_36080	T8L23.15; expressed protein	5	5	375	0	0	130
11468	Pp3c1_36080V3.4	Pp3c1_36080	T8L23.15; expressed protein	5	5	422	0	0	177
11469	Pp3c1_36080V3.1	Pp3c1_36080	T8L23.15; expressed protein	5	5	422	0	0	177
11470	PAC:32968578.CDS.1	Pp3c1_36080	T8L23.15; expressed protein	5	5	277	0	0	32
11888	Pp3c26_4810V3.6	Pp3c26_4810	signal peptide peptidase-like 3	5	5	338	0	0	111
11889	Pp3c26_4810V3.3	Pp3c26_4810	signal peptide peptidase-like 3	5	5	374	0	0	111
11890	Pp3c26_4810V3.4	Pp3c26_4810	signal peptide peptidase-like 3	5	5	374	0	0	111
11891	Pp3c26_4810V3.1	Pp3c26_4810	signal peptide peptidase-like 3	5	5	374	0	0	111
11892	Pp3c26_4810V3.2	Pp3c26_4810	signal peptide peptidase-like 3	5	5	374	0	0	111
11893	Pp3c26_4810V3.5	Pp3c26_4810	signal peptide peptidase-like 3	5	5	374	0	0	111
12233	Pp3c6_11200V3.6	Pp3c6_11200	phosphatidate cytidylyltransferase	5	8	489	0	0	109
12234	Pp3c6_11200V3.12	Pp3c6_11200	phosphatidate cytidylyltransferase	5	8	489	0	0	109
12235	Pp3c6_11200V3.11	Pp3c6_11200	phosphatidate cytidylyltransferase	5	8	489	0	0	109
12236	Pp3c6_11200V3.14	Pp3c6_11200	phosphatidate cytidylyltransferase	5	8	491	0	0	111
12237	Pp3c6_11200V3.4	Pp3c6_11200	phosphatidate cytidylyltransferase	5	8	489	0	0	109
12238	Pp3c6_11200V3.7	Pp3c6_11200	phosphatidate cytidylyltransferase	5	8	489	0	0	109
12239	Pp3c6_11200V3.15	Pp3c6_11200	phosphatidate cytidylyltransferase	5	8	489	0	0	109
12240	Pp3c6_11200V3.3	Pp3c6_11200	phosphatidate cytidylyltransferase	5	8	489	0	0	109
12241	Pp3c6_11200V3.5	Pp3c6_11200	phosphatidate cytidylyltransferase	5	8	489	0	0	109
12242	Pp3c6_11200V3.13	Pp3c6_11200	phosphatidate cytidylyltransferase	5	8	491	0	0	111
12243	Pp3c6_11200V3.1	Pp3c6_11200	phosphatidate cytidylyltransferase	5	8	489	0	0	109
12244	Pp3c6_11200V3.2	Pp3c6_11200	phosphatidate cytidylyltransferase	5	8	489	0	0	109
12245	Pp3c6_11200V3.10	Pp3c6_11200	phosphatidate cytidylyltransferase	5	8	489	0	0	109
12246	Pp3c6_11200V3.17	Pp3c6_11200	phosphatidate cytidylyltransferase	5	8	489	0	0	109
12247	Pp3c6_11200V3.16	Pp3c6_11200	phosphatidate cytidylyltransferase	5	8	489	0	0	109
12248	Pp3c6_11200V3.8	Pp3c6_11200	phosphatidate cytidylyltransferase	5	8	489	0	0	109
12249	Pp3c6_11200V3.9	Pp3c6_11200	phosphatidate cytidylyltransferase	5	8	489	0	0	109
13944	Pp3c8_25140V3.3	Pp3c8_25140	:endomembrane protein emp70 precusor isolog	5	5	590	0	1	355
13946	Pp3c8_25140V3.1	Pp3c8_25140	:endomembrane protein emp70 precusor isolog	5	5	590	0	1	355
14717	Pp3c8_9720V3.3	Pp3c8_9720	major facilitator superfamily protein	5	7	459	0	0	0
14718	Pp3c8_9720V3.1	Pp3c8_9720	major facilitator superfamily protein	5	7	459	0	0	0
15893	Pp3c14_8120V3.2	Pp3c14_8120	Light-sensor Protein kinase [Includes: Phytochrome; Protein kinase ]	5	17	1484	0	1	217
15894	Pp3c14_8120V3.1	Pp3c14_8120	Light-sensor Protein kinase [Includes: Phytochrome; Protein kinase ]	5	17	1484	0	1	217
16399	Pp3c15_640V3.3	Pp3c15_640	auxin influx carrier component	5	7	482	0	0	92
16400	Pp3c15_640V3.2	Pp3c15_640	auxin influx carrier component	5	7	387	0	0	0
16401	Pp3c15_640V3.1	Pp3c15_640	auxin influx carrier component	5	7	482	0	0	92
16719	Pp3c24_4810V3.3	Pp3c24_4810	major facilitator superfamily protein	5	7	459	0	0	0
16720	Pp3c24_4810V3.2	Pp3c24_4810	major facilitator superfamily protein	5	7	459	0	0	0
16721	Pp3c24_4810V3.1	Pp3c24_4810	major facilitator superfamily protein	5	7	459	0	0	0
17391	Pp3c1_33470V3.15	Pp3c1_33470	K2A11.7; expressed protein	5	6	537	0	0	290
17392	Pp3c1_33470V3.10	Pp3c1_33470	K2A11.7; expressed protein	5	6	539	0	0	294
17394	Pp3c1_33470V3.9	Pp3c1_33470	K2A11.7; expressed protein	5	6	535	0	0	290
17396	Pp3c1_33470V3.8	Pp3c1_33470	K2A11.7; expressed protein	5	6	535	0	0	290
17398	Pp3c1_33470V3.6	Pp3c1_33470	K2A11.7; expressed protein	5	6	602	0	0	355
17399	Pp3c1_33470V3.18	Pp3c1_33470	K2A11.7; expressed protein	5	6	541	0	0	294
17400	Pp3c1_33470V3.5	Pp3c1_33470	K2A11.7; expressed protein	5	6	598	0	0	351
17402	Pp3c1_33470V3.3	Pp3c1_33470	K2A11.7; expressed protein	5	6	541	0	0	294
17404	Pp3c1_33470V3.1	Pp3c1_33470	K2A11.7; expressed protein	5	6	539	0	0	294
17407	Pp3c1_33470V3.16	Pp3c1_33470	K2A11.7; expressed protein	5	6	541	0	0	294
17408	Pp3c1_33470V3.4	Pp3c1_33470	K2A11.7; expressed protein	5	6	541	0	0	294
17409	Pp3c1_33470V3.2	Pp3c1_33470	K2A11.7; expressed protein	5	6	537	0	0	290
17410	Pp3c1_33470V3.17	Pp3c1_33470	K2A11.7; expressed protein	5	6	541	0	0	294
18112	Pp3c6_26100V3.3	Pp3c6_26100	wd repeat and fyve domain containing 3 isoform 1	5	10	3463	0	1	3171
18258	Pp3c1_2170V3.3	Pp3c1_2170	N/A	5	8	759	0	0	171
18259	Pp3c1_2170V3.1	Pp3c1_2170	N/A	5	6	548	0	0	171
18260	Pp3c1_2170V3.2	Pp3c1_2170	N/A	5	8	734	0	0	171
19558	Pp3c11_22280V3.2	Pp3c11_22280	thyroid hormone receptor-associated	5	11	2072	0	0	368
19559	Pp3c11_22280V3.4	Pp3c11_22280	thyroid hormone receptor-associated	5	11	2072	0	0	368
19560	Pp3c11_22280V3.1	Pp3c11_22280	thyroid hormone receptor-associated	5	11	2053	0	0	368
19561	Pp3c11_22280V3.3	Pp3c11_22280	thyroid hormone receptor-associated	5	10	1854	0	0	150
19818	Pp3c9_620V3.1	Pp3c9_620	auxin influx carrier component	5	7	482	0	0	92
19819	Pp3c9_620V3.2	Pp3c9_620	auxin influx carrier component	5	7	482	0	0	92
22546	Pp3c15_10620V3.1	Pp3c15_10620	N/A	5	7	948	0	0	385
22547	Pp3c15_10620V3.3	Pp3c15_10620	N/A	5	7	948	0	0	385
22548	Pp3c15_10620V3.2	Pp3c15_10620	N/A	5	7	947	0	0	385
22604	Pp3c6_27190V3.4	Pp3c6_27190	auxin influx carrier component	5	7	474	0	0	177
22605	Pp3c6_27190V3.1	Pp3c6_27190	auxin influx carrier component	5	7	470	0	0	173
22606	Pp3c6_27190V3.3	Pp3c6_27190	auxin influx carrier component	5	7	474	0	0	177
22607	Pp3c6_27190V3.5	Pp3c6_27190	auxin influx carrier component	5	7	376	0	0	79
22608	Pp3c6_27190V3.2	Pp3c6_27190	auxin influx carrier component	5	7	470	0	0	173
22645	Pp3c15_4550V3.2	Pp3c15_4550	endosomal p24a protein	5	6	640	0	0	333
22646	Pp3c15_4550V3.1	Pp3c15_4550	endosomal p24a protein	5	6	640	0	0	333
23296	Pp3c21_18740V3.2	Pp3c21_18740	lanatoside 15-o-acetylesterase	5	5	311	0	0	33
23298	Pp3c21_18740V3.1	Pp3c21_18740	lanatoside 15-o-acetylesterase	5	5	294	0	0	16
23955	PAC:32961859.CDS.1	Pp3c14_19880	dolichyl pyrophosphate glc1man9 c2 alpha- -glucosyltransferase	5	7	514	0	3	152
23956	PAC:32961860.CDS.1	Pp3c14_19880	dolichyl pyrophosphate glc1man9 c2 alpha- -glucosyltransferase	5	7	514	0	3	152
25434	Pp3c1_1170V3.1	Pp3c1_1170	SWIRM domain protein:lysine-specific histone	5	8	1814	0	0	957
25435	Pp3c1_1170V3.2	Pp3c1_1170	SWIRM domain protein:lysine-specific histone	5	8	1814	0	0	957
26273	Pp3c9_17430V3.2	Pp3c9_17430	F11F19.19; expressed protein [Arabidopsis thaliana]	5	5	242	0	0	7
26274	Pp3c9_17430V3.1	Pp3c9_17430	F11F19.19; expressed protein [Arabidopsis thaliana]	5	5	242	0	0	7
26608	Pp3c1_6385V3.1	Pp3c1_6385	N/A	5	8	1803	0	0	946
30297	Pp3c11_19940V3.1	Pp3c11_19940	proline transporter	5	6	452	0	1	106
30298	Pp3c11_19940V3.2	Pp3c11_19940	proline transporter	5	6	452	0	1	106
30490	Pp3c20_1720V3.6	Pp3c20_1720	branched chain keto acid dehydrogenase beta polypeptide	5	6	379	0	1	0
30491	Pp3c20_1720V3.9	Pp3c20_1720	branched chain keto acid dehydrogenase beta polypeptide	5	6	389	0	1	0
30492	Pp3c20_1720V3.4	Pp3c20_1720	branched chain keto acid dehydrogenase beta polypeptide	5	6	354	0	1	0
30493	Pp3c20_1720V3.7	Pp3c20_1720	branched chain keto acid dehydrogenase beta polypeptide	5	6	354	0	1	0
30494	Pp3c20_1720V3.2	Pp3c20_1720	branched chain keto acid dehydrogenase beta polypeptide	5	6	379	0	1	0
30495	Pp3c20_1720V3.1	Pp3c20_1720	branched chain keto acid dehydrogenase beta polypeptide	5	6	379	0	1	0
30496	Pp3c20_1720V3.3	Pp3c20_1720	branched chain keto acid dehydrogenase beta polypeptide	5	7	398	0	1	0
30497	Pp3c20_1720V3.5	Pp3c20_1720	branched chain keto acid dehydrogenase beta polypeptide	5	6	375	0	1	0
30498	Pp3c20_1720V3.8	Pp3c20_1720	branched chain keto acid dehydrogenase beta polypeptide	5	6	375	0	1	0
30924	Pp3c1_19220V3.2	Pp3c1_19220	CDC2+/CDC28-related protein kinase R2	5	5	408	0	0	141
30925	Pp3c1_19220V3.1	Pp3c1_19220	CDC2+/CDC28-related protein kinase R2	5	5	408	0	0	141
30926	Pp3c1_19220V3.3	Pp3c1_19220	CDC2+/CDC28-related protein kinase R2	5	5	415	0	0	141
31151	Pp3c7_3230V3.2	Pp3c7_3230	N/A	5	14	2657	0	1	426
31152	Pp3c7_3230V3.3	Pp3c7_3230	N/A	5	14	2704	0	1	426
31153	Pp3c7_3230V3.1	Pp3c7_3230	N/A	5	14	2704	0	1	426
31287	Pp3c10_24280V3.1	Pp3c10_24280	high affinity inorganic phosphate transporter	5	7	554	0	1	84
31288	Pp3c10_24280V3.2	Pp3c10_24280	high affinity inorganic phosphate transporter	5	7	554	0	1	84
32321	Pp3c10_1880V3.2	Pp3c10_1880	leucine-rich repeat receptor-like protein kinase	5	5	909	0	1	595
32322	Pp3c10_1880V3.1	Pp3c10_1880	leucine-rich repeat receptor-like protein kinase	5	5	909	0	1	595
34501	Pp3c4_16320V3.1	Pp3c4_16320	alpha-l-fucosidase 2	5	5	321	0	1	22
34502	Pp3c4_16320V3.2	Pp3c4_16320	alpha-l-fucosidase 2	5	5	363	0	1	22
35788	Pp3c16_840V3.1	Pp3c16_840	nucleobase ascorbate transporter	5	9	534	0	0	208
35789	Pp3c16_840V3.2	Pp3c16_840	nucleobase ascorbate transporter	5	9	534	0	0	208
36305	Pp3c13_24530V3.4	Pp3c13_24530	F8K7.4; calcium-binding EF hand family protein	5	6	1017	0	0	777
36306	Pp3c13_24530V3.5	Pp3c13_24530	F8K7.4; calcium-binding EF hand family protein	5	6	1022	0	0	777
37848	Pp3c1_16920V3.2	Pp3c1_16920	nucleic acid binding	5	5	649	0	0	317
37849	Pp3c1_16920V3.5	Pp3c1_16920	nucleic acid binding	5	5	770	0	0	438
37850	Pp3c1_16920V3.1	Pp3c1_16920	nucleic acid binding	5	5	770	0	0	438
37851	Pp3c1_16920V3.4	Pp3c1_16920	nucleic acid binding	5	5	660	0	0	328
37852	Pp3c1_16920V3.3	Pp3c1_16920	nucleic acid binding	5	5	652	0	0	320
38063	Pp3c3_16290V3.2	Pp3c3_16290	T19L18.12; expressed protein [Arabidopsis thaliana]	5	5	296	0	0	91
38064	Pp3c3_16290V3.4	Pp3c3_16290	T19L18.12; expressed protein [Arabidopsis thaliana]	5	5	296	0	0	91
38065	Pp3c3_16290V3.3	Pp3c3_16290	T19L18.12; expressed protein [Arabidopsis thaliana]	5	5	296	0	0	91
38066	Pp3c3_16290V3.1	Pp3c3_16290	T19L18.12; expressed protein [Arabidopsis thaliana]	5	5	296	0	0	91
38067	Pp3c3_16290V3.5	Pp3c3_16290	T19L18.12; expressed protein [Arabidopsis thaliana]	5	5	296	0	0	91
38828	Pp3c22_2400V3.1	Pp3c22_2400	cation proton exchanger	5	6	827	0	1	156
38829	Pp3c22_2400V3.2	Pp3c22_2400	cation proton exchanger	5	6	827	0	1	156
39336	Pp3c1_2220V3.1	Pp3c1_2220	vacuolar h+-translocating inorganic pyrophosphatase	5	9	741	0	0	171
39337	Pp3c1_2220V3.2	Pp3c1_2220	vacuolar h+-translocating inorganic pyrophosphatase	5	8	674	0	0	171
39466	Pp3c3_29930V3.6	Pp3c3_29930	N/A	5	6	286	0	0	0
39467	Pp3c3_29930V3.1	Pp3c3_29930	N/A	5	5	211	0	0	0
39468	Pp3c3_29930V3.3	Pp3c3_29930	N/A	5	5	211	0	0	0
39469	Pp3c3_29930V3.5	Pp3c3_29930	N/A	5	6	318	0	0	0
39470	Pp3c3_29930V3.7	Pp3c3_29930	N/A	5	6	286	0	0	0
39471	Pp3c3_29930V3.2	Pp3c3_29930	N/A	5	5	243	0	0	0
39472	Pp3c3_29930V3.4	Pp3c3_29930	N/A	5	5	243	0	0	0
42678	Pp3c3_14110V3.1	Pp3c3_14110	brassinosteroid insensitive 1-associated receptor kinase 1	5	5	627	0	1	310
42679	Pp3c3_14110V3.2	Pp3c3_14110	brassinosteroid insensitive 1-associated receptor kinase 1	5	5	627	0	1	310
43265	Pp3c23_12700V3.2	Pp3c23_12700	proline transporter	5	7	461	0	1	94
43266	Pp3c23_12700V3.3	Pp3c23_12700	proline transporter	5	7	478	0	1	94
43267	Pp3c23_12700V3.1	Pp3c23_12700	proline transporter	5	7	461	0	1	94
43518	Pp3c3_23290V3.3	Pp3c3_23290	Protein C10orf58 precursor [Homo sapiens]	5	6	458	0	0	41
43519	Pp3c3_23290V3.2	Pp3c3_23290	Protein C10orf58 precursor [Homo sapiens]	5	6	459	0	0	41
43520	Pp3c3_23290V3.1	Pp3c3_23290	Protein C10orf58 precursor [Homo sapiens]	5	6	458	0	0	41
43521	Pp3c3_23290V3.4	Pp3c3_23290	Protein C10orf58 precursor [Homo sapiens]	5	6	458	0	0	41
45707	Pp3c11_2790V3.4	Pp3c11_2790	F17O14.11; alphavirus core protein family	5	5	372	0	1	0
45708	Pp3c11_2790V3.2	Pp3c11_2790	F17O14.11; alphavirus core protein family	5	5	372	0	1	0
45709	Pp3c11_2790V3.5	Pp3c11_2790	F17O14.11; alphavirus core protein family	5	5	372	0	1	0
45710	Pp3c11_2790V3.3	Pp3c11_2790	F17O14.11; alphavirus core protein family	5	5	372	0	1	0
45711	Pp3c11_2790V3.1	Pp3c11_2790	F17O14.11; alphavirus core protein family	5	5	372	0	1	0
48925	Pp3c7_18440V3.1	Pp3c7_18440	T7D17.2; expressed protein	5	5	434	0	0	8
48926	Pp3c7_18440V3.2	Pp3c7_18440	T7D17.2; expressed protein	5	5	434	0	0	8
48927	Pp3c7_18440V3.3	Pp3c7_18440	T7D17.2; expressed protein	5	5	434	0	0	8
50673	Pp3c1_30640V3.2	Pp3c1_30640	ncs1 nucleoside transporter family	5	8	612	1	0	76
50674	Pp3c1_30640V3.1	Pp3c1_30640	ncs1 nucleoside transporter family	5	8	612	1	0	76
50675	Pp3c1_30640V3.3	Pp3c1_30640	ncs1 nucleoside transporter family	5	8	612	1	0	76
51797	Pp3c5_15750V3.4	Pp3c5_15750	N/A	5	8	561	1	0	50
51798	Pp3c5_15750V3.6	Pp3c5_15750	N/A	5	8	558	1	0	50
51799	Pp3c5_15750V3.3	Pp3c5_15750	N/A	5	8	561	1	0	50
51800	Pp3c5_15750V3.2	Pp3c5_15750	N/A	5	8	561	1	0	50
51801	Pp3c5_15750V3.5	Pp3c5_15750	N/A	5	8	561	1	0	50
51802	Pp3c5_15750V3.1	Pp3c5_15750	N/A	5	8	561	1	0	50
54288	PAC:32929495.CDS.1	Pp3c15_3340	phosphoglucomutase	5	5	629	0	0	243
54289	PAC:32929493.CDS.1	Pp3c15_3340	phosphoglucomutase	5	5	629	0	0	243
54290	PAC:32929494.CDS.1	Pp3c15_3340	phosphoglucomutase	5	5	629	0	0	243
56378	Pp3c9_8630V3.1	Pp3c9_8630	endosomal p24a protein	5	6	645	0	0	338
56379	Pp3c9_8630V3.2	Pp3c9_8630	endosomal p24a protein	5	6	645	0	0	338
56816	Pp3c2_2520V3.1	Pp3c2_2520	dead deah box helicase family expressed	5	7	830	0	0	601
56818	Pp3c2_2520V3.2	Pp3c2_2520	dead deah box helicase family expressed	5	7	830	0	0	601
57623	PAC:32945705.CDS.1	Pp3c20_15490	oxalate/formate antiporter [Dictyostelium discoideum]	5	10	546	0	0	129
57624	PAC:32945706.CDS.1	Pp3c20_15490	oxalate/formate antiporter [Dictyostelium discoideum]	5	10	546	0	0	129
59126	Pp3c20_9290V3.1	Pp3c20_9290	N/A	5	6	774	0	0	375
59129	Pp3c20_9290V3.6	Pp3c20_9290	N/A	5	6	774	0	0	375
59130	Pp3c20_9290V3.7	Pp3c20_9290	N/A	5	6	767	0	0	375
59643	Pp3c1_6380V3.1	Pp3c1_6380	N/A	5	8	1803	0	0	946
59828	Pp3c14_13560V3.20	Pp3c14_13560	nucleic acid binding protein	5	6	470	0	0	173
59829	Pp3c14_13560V3.9	Pp3c14_13560	nucleic acid binding protein	5	6	722	0	0	425
59830	Pp3c14_13560V3.5	Pp3c14_13560	nucleic acid binding protein	5	6	722	0	0	425
59831	Pp3c14_13560V3.14	Pp3c14_13560	nucleic acid binding protein	5	6	722	0	0	425
59832	Pp3c14_13560V3.6	Pp3c14_13560	nucleic acid binding protein	5	6	722	0	0	425
59833	Pp3c14_13560V3.22	Pp3c14_13560	nucleic acid binding protein	5	6	722	0	0	425
59834	Pp3c14_13560V3.24	Pp3c14_13560	nucleic acid binding protein	5	6	722	0	0	425
59837	Pp3c14_13560V3.8	Pp3c14_13560	nucleic acid binding protein	5	6	722	0	0	425
59839	Pp3c14_13560V3.4	Pp3c14_13560	nucleic acid binding protein	5	6	722	0	0	425
59841	Pp3c14_13560V3.11	Pp3c14_13560	nucleic acid binding protein	5	6	722	0	0	425
59842	Pp3c14_13560V3.7	Pp3c14_13560	nucleic acid binding protein	5	6	722	0	0	425
59844	Pp3c14_13560V3.2	Pp3c14_13560	nucleic acid binding protein	5	6	722	0	0	425
59845	Pp3c14_13560V3.13	Pp3c14_13560	nucleic acid binding protein	5	6	722	0	0	425
59846	Pp3c14_13560V3.3	Pp3c14_13560	nucleic acid binding protein	5	6	722	0	0	425
59848	Pp3c14_13560V3.21	Pp3c14_13560	nucleic acid binding protein	5	6	722	0	0	425
59849	Pp3c14_13560V3.12	Pp3c14_13560	nucleic acid binding protein	5	6	722	0	0	425
59850	Pp3c14_13560V3.1	Pp3c14_13560	nucleic acid binding protein	5	6	722	0	0	425
59851	Pp3c14_13560V3.23	Pp3c14_13560	nucleic acid binding protein	5	6	722	0	0	425
59852	Pp3c14_13560V3.10	Pp3c14_13560	nucleic acid binding protein	5	6	722	0	0	425
59985	Pp3c7_3600V3.3	Pp3c7_3600	N/A	5	5	1022	0	1	722
59986	Pp3c7_3600V3.7	Pp3c7_3600	N/A	5	5	1025	0	1	722
59987	Pp3c7_3600V3.6	Pp3c7_3600	N/A	5	5	1035	0	1	722
59988	Pp3c7_3600V3.1	Pp3c7_3600	N/A	5	5	830	0	1	530
59989	Pp3c7_3600V3.5	Pp3c7_3600	N/A	5	5	1022	0	1	722
59990	Pp3c7_3600V3.2	Pp3c7_3600	N/A	5	5	1022	0	1	722
59991	Pp3c7_3600V3.4	Pp3c7_3600	N/A	5	5	1022	0	1	722
59992	Pp3c7_3600V3.8	Pp3c7_3600	N/A	5	5	1025	0	1	722
60411	PAC:32948831.CDS.1	Pp3c23_17590	nodulin-like protein	5	7	639	0	0	373
60412	PAC:32948832.CDS.1	Pp3c23_17590	nodulin-like protein	5	7	639	0	0	373
61300	Pp3c9_3590V3.1	Pp3c9_3590	auxin influx carrier component	5	8	486	0	0	95
61306	Pp3c2_28440V3.1	Pp3c2_28440	N/A	5	7	679	0	1	211
61307	Pp3c2_28440V3.2	Pp3c2_28440	N/A	5	7	727	0	1	259
63659	PAC:32912340.CDS.1	Pp3c9_5060	phosphoglucomutase	5	5	634	0	0	248
63660	PAC:32912339.CDS.1	Pp3c9_5060	phosphoglucomutase	5	5	634	0	0	248
64050	Pp3c14_20990V3.3	Pp3c14_20990	ncs1 nucleoside transporter family	5	8	540	0	0	60
64051	Pp3c14_20990V3.2	Pp3c14_20990	ncs1 nucleoside transporter family	5	8	540	0	0	60
64052	Pp3c14_20990V3.1	Pp3c14_20990	ncs1 nucleoside transporter family	5	8	540	0	0	60
64240	Pp3c17_13940V3.2	Pp3c17_13940	N/A	5	5	555	0	0	161
64241	Pp3c17_13940V3.1	Pp3c17_13940	N/A	5	5	555	0	0	161
66830	PAC:32949499.CDS.1	Pp3c23_14220	BRASSINOSTEROID INSENSITIVE 1-associated receptor kinase 1 precursor (BRI1-associated receptor kinase 1) (Somatic embryogenesis receptor-like kinase 3)	5	5	651	0	0	316
66831	PAC:32949500.CDS.1	Pp3c23_14220	BRASSINOSTEROID INSENSITIVE 1-associated receptor kinase 1 precursor (BRI1-associated receptor kinase 1) (Somatic embryogenesis receptor-like kinase 3)	5	5	651	0	0	316
69066	Pp3c3_20390V3.5	Pp3c3_20390	MKP6.28; cyclic nucleotide-binding transporter 1 / CNBT1 (CNGC20) [KO:K05391]	5	6	716	0	0	180
69067	Pp3c3_20390V3.1	Pp3c3_20390	MKP6.28; cyclic nucleotide-binding transporter 1 / CNBT1 (CNGC20) [KO:K05391]	5	6	716	0	0	180
69068	Pp3c3_20390V3.2	Pp3c3_20390	MKP6.28; cyclic nucleotide-binding transporter 1 / CNBT1 (CNGC20) [KO:K05391]	5	6	577	0	0	41
69069	Pp3c3_20390V3.4	Pp3c3_20390	MKP6.28; cyclic nucleotide-binding transporter 1 / CNBT1 (CNGC20) [KO:K05391]	5	6	716	0	0	180
69070	Pp3c3_20390V3.3	Pp3c3_20390	MKP6.28; cyclic nucleotide-binding transporter 1 / CNBT1 (CNGC20) [KO:K05391]	5	6	716	0	0	180
70711	Pp3c19_8230V3.2	Pp3c19_8230	rna binding	5	5	414	0	1	173
70712	Pp3c19_8230V3.3	Pp3c19_8230	rna binding	5	5	427	0	1	186
70713	Pp3c19_8230V3.6	Pp3c19_8230	rna binding	5	5	438	0	1	197
70714	Pp3c19_8230V3.1	Pp3c19_8230	rna binding	5	5	414	0	1	173
70715	Pp3c19_8230V3.5	Pp3c19_8230	rna binding	5	5	408	0	1	167
70716	Pp3c19_8230V3.4	Pp3c19_8230	rna binding	5	5	408	0	1	167
71442	Pp3c3_6480V3.7	Pp3c3_6480	vacuolar proton	5	7	686	0	0	332
71443	Pp3c3_6480V3.3	Pp3c3_6480	vacuolar proton	5	6	703	0	0	276
71444	Pp3c3_6480V3.14	Pp3c3_6480	vacuolar proton	5	6	630	0	0	276
71445	Pp3c3_6480V3.11	Pp3c3_6480	vacuolar proton	5	8	749	0	0	394
71447	Pp3c3_6480V3.1	Pp3c3_6480	vacuolar proton	5	6	641	0	0	214
71449	Pp3c3_6480V3.5	Pp3c3_6480	vacuolar proton	5	7	753	0	0	394
71450	Pp3c3_6480V3.2	Pp3c3_6480	vacuolar proton	5	7	821	0	0	394
71451	Pp3c3_6480V3.19	Pp3c3_6480	vacuolar proton	5	7	821	0	0	394
71452	Pp3c3_6480V3.12	Pp3c3_6480	vacuolar proton	5	7	748	0	0	394
71453	Pp3c3_6480V3.4	Pp3c3_6480	vacuolar proton	5	7	759	0	0	332
71454	Pp3c3_6480V3.6	Pp3c3_6480	vacuolar proton	5	6	568	0	0	214
73050	Pp3c22_14360V3.4	Pp3c22_14360	N/A	5	6	707	0	1	115
73051	Pp3c22_14360V3.3	Pp3c22_14360	N/A	5	6	707	0	1	115
73052	Pp3c22_14360V3.1	Pp3c22_14360	N/A	5	6	690	0	1	98
73053	Pp3c22_14360V3.2	Pp3c22_14360	N/A	5	6	707	0	1	115
74156	Pp3c15_2390V3.2	Pp3c15_2390	T16B24.15; nodulin family protein [Arabidopsis thaliana]:F25A4.25; nodulin family protein [Arabidopsis thaliana]	5	8	584	0	0	344
74157	Pp3c15_2390V3.1	Pp3c15_2390	T16B24.15; nodulin family protein [Arabidopsis thaliana]:F25A4.25; nodulin family protein [Arabidopsis thaliana]	5	8	584	0	0	344
75917	Pp3c16_18150V3.2	Pp3c16_18150	anion exchanger family protein	5	5	674	0	0	10
75918	Pp3c16_18150V3.1	Pp3c16_18150	anion exchanger family protein	5	5	674	0	0	10
76821	Pp3c24_9660V3.1	Pp3c24_9660	peptidyl-prolyl cis-trans isomerase	5	5	247	1	0	12
76822	Pp3c24_9660V3.2	Pp3c24_9660	peptidyl-prolyl cis-trans isomerase	5	5	247	1	0	12
78628	Pp3c4_24480V3.3	Pp3c4_24480	vacuolar proton	5	7	818	0	0	391
78629	Pp3c4_24480V3.2	Pp3c4_24480	vacuolar proton	5	7	818	0	0	391
78630	Pp3c4_24480V3.1	Pp3c4_24480	vacuolar proton	5	7	821	0	0	394
79035	Pp3c13_3420V3.3	Pp3c13_3420	N/A	5	8	817	0	1	390
79036	Pp3c13_3420V3.8	Pp3c13_3420	N/A	5	8	758	0	1	331
79037	Pp3c13_3420V3.2	Pp3c13_3420	N/A	5	8	817	0	1	390
79038	Pp3c13_3420V3.1	Pp3c13_3420	N/A	5	8	817	0	1	390
79039	Pp3c13_3420V3.7	Pp3c13_3420	N/A	5	8	755	0	1	328
79040	Pp3c13_3420V3.5	Pp3c13_3420	N/A	5	8	820	0	1	393
79041	Pp3c13_3420V3.6	Pp3c13_3420	N/A	5	8	820	0	1	393
79042	Pp3c13_3420V3.10	Pp3c13_3420	N/A	5	8	820	0	1	393
79043	Pp3c13_3420V3.9	Pp3c13_3420	N/A	5	8	758	0	1	331
79044	Pp3c13_3420V3.4	Pp3c13_3420	N/A	5	8	820	0	1	393
81281	Pp3c8_25110V3.3	Pp3c8_25110	N/A	5	5	590	0	1	355
81283	Pp3c8_25110V3.1	Pp3c8_25110	N/A	5	5	590	0	1	355
81628	Pp3c15_23940V3.5	Pp3c15_23940	dual specificity protein	5	5	262	0	2	45
81629	Pp3c15_23940V3.8	Pp3c15_23940	dual specificity protein	5	5	262	0	2	45
81630	Pp3c15_23940V3.3	Pp3c15_23940	dual specificity protein	5	5	262	0	2	45
81631	Pp3c15_23940V3.6	Pp3c15_23940	dual specificity protein	5	5	262	0	2	45
81632	Pp3c15_23940V3.4	Pp3c15_23940	dual specificity protein	5	5	262	0	2	45
81633	Pp3c15_23940V3.7	Pp3c15_23940	dual specificity protein	5	5	262	0	2	45
81634	Pp3c15_23940V3.2	Pp3c15_23940	dual specificity protein	5	5	259	0	2	45
81635	Pp3c15_23940V3.1	Pp3c15_23940	dual specificity protein	5	5	259	0	2	45
81758	Pp3c5_22060V3.4	Pp3c5_22060	glutathione s-transferase kappa 1	5	5	240	0	1	27
81760	Pp3c5_22060V3.3	Pp3c5_22060	glutathione s-transferase kappa 1	5	5	240	0	1	27
81762	Pp3c5_22060V3.5	Pp3c5_22060	glutathione s-transferase kappa 1	5	5	240	0	1	27
81764	Pp3c5_22060V3.1	Pp3c5_22060	glutathione s-transferase kappa 1	5	5	240	0	1	27
81765	Pp3c5_22060V3.2	Pp3c5_22060	glutathione s-transferase kappa 1	5	5	240	0	1	27
83331	Pp3c8_1680V3.1	Pp3c8_1680	pectinesterase ppe8b	5	5	546	0	1	45
83332	Pp3c8_1680V3.2	Pp3c8_1680	pectinesterase ppe8b	5	5	546	0	1	45
84435	Pp3c12_23490V3.3	Pp3c12_23490	F22I13.1; protein kinase family protein	5	7	710	0	0	108
84436	Pp3c12_23490V3.1	Pp3c12_23490	F22I13.1; protein kinase family protein	5	7	710	0	0	108
84437	Pp3c12_23490V3.2	Pp3c12_23490	F22I13.1; protein kinase family protein	5	7	635	0	0	33
84438	Pp3c12_23490V3.4	Pp3c12_23490	F22I13.1; protein kinase family protein	5	7	710	0	0	108
85648	Pp3c19_20640V3.1	Pp3c19_20640	ubiquitin specific peptidase 16	5	7	1230	0	0	265
85649	Pp3c19_20640V3.2	Pp3c19_20640	ubiquitin specific peptidase 16	5	7	1230	0	0	265
85650	Pp3c19_20640V3.3	Pp3c19_20640	ubiquitin specific peptidase 16	5	7	1230	0	0	265
86057	PAC:32923459.CDS.1	Pp3c7_6450	sugar transporter family protein	5	9	590	0	1	99
86058	PAC:32923460.CDS.1	Pp3c7_6450	sugar transporter family protein	5	9	590	0	1	99
372	Pp3c2_28690V3.1	Pp3c2_28690	Abnormal spindle-like microcephaly-associated protein homolog [Felis catus]	4	6	1100	0	0	0
373	Pp3c2_28690V3.2	Pp3c2_28690	Abnormal spindle-like microcephaly-associated protein homolog [Felis catus]	4	6	1100	0	0	0
500	Pp3c18_2410V3.1	Pp3c18_2410	nbs-lrr resistance protein:protein kinase	4	5	685	0	0	64
800	Pp3c19_20960V3.1	Pp3c19_20960	rhomboid family protein	4	5	580	0	0	303
801	Pp3c19_20960V3.2	Pp3c19_20960	rhomboid family protein	4	5	580	0	0	303
1154	Pp3c15_8520V3.1	Pp3c15_8520	e1 component	4	5	441	0	0	94
1155	Pp3c15_8520V3.2	Pp3c15_8520	e1 component	4	5	441	0	0	94
1624	Pp3c9_8210V3.3	Pp3c9_8210	N/A	4	5	848	0	0	386
1625	Pp3c9_8210V3.2	Pp3c9_8210	N/A	4	5	946	0	0	386
1626	Pp3c9_8210V3.4	Pp3c9_8210	N/A	4	5	738	0	0	178
1627	Pp3c9_8210V3.5	Pp3c9_8210	N/A	4	5	739	0	0	178
1628	Pp3c9_8210V3.1	Pp3c9_8210	N/A	4	5	947	0	0	386
1629	Pp3c9_8210V3.6	Pp3c9_8210	N/A	4	5	946	0	0	386
1812	Pp3c1_18520V3.1	Pp3c1_18520	N/A	4	5	639	1	0	320
1885	Pp3c9_2940V3.4	Pp3c9_2940	trna 2 -phosphotransferase 1	4	4	357	0	1	1
1887	Pp3c9_2940V3.3	Pp3c9_2940	trna 2 -phosphotransferase 1	4	4	323	0	1	0
1888	Pp3c9_2940V3.5	Pp3c9_2940	trna 2 -phosphotransferase 1	4	4	367	0	1	11
1889	Pp3c9_2940V3.1	Pp3c9_2940	trna 2 -phosphotransferase 1	4	4	323	0	1	0
2051	Pp3c13_14970V3.3	Pp3c13_14970	phosphoribosylglycinamide formyltransferase	4	4	328	0	0	36
2052	Pp3c13_14970V3.1	Pp3c13_14970	phosphoribosylglycinamide formyltransferase	4	4	328	0	0	36
2053	Pp3c13_14970V3.2	Pp3c13_14970	phosphoribosylglycinamide formyltransferase	4	4	328	0	0	36
2192	Pp3c25_10350V3.4	Pp3c25_10350	phosphoglucomutase a	4	5	528	0	0	190
2193	Pp3c25_10350V3.2	Pp3c25_10350	phosphoglucomutase a	4	5	581	0	0	190
2194	Pp3c25_10350V3.3	Pp3c25_10350	phosphoglucomutase a	4	5	581	0	0	190
2195	Pp3c25_10350V3.1	Pp3c25_10350	phosphoglucomutase a	4	5	581	0	0	190
2196	Pp3c25_10350V3.5	Pp3c25_10350	phosphoglucomutase a	4	5	528	0	0	190
2249	Pp3c11_8780V3.1	Pp3c11_8780	nuclear receptor co-repressor 1:LOC417598; similar to KIAA1047 protein [Gallus gallus]	4	8	2316	0	1	110
2255	Pp3c15_24050V3.2	Pp3c15_24050	zinc finger c-x8-c-x5-c-x3-h type family protein	4	5	440	0	0	41
2256	Pp3c15_24050V3.1	Pp3c15_24050	zinc finger c-x8-c-x5-c-x3-h type family protein	4	5	431	0	0	32
2391	PAC:32963092.CDS.1	Pp3c14_16840	T2I1.1; receptor-related protein kinase-like protein	4	7	1365	0	0	1051
2392	PAC:32963091.CDS.1	Pp3c14_16840	T2I1.1; receptor-related protein kinase-like protein	4	7	1365	0	0	1051
2393	PAC:32963093.CDS.1	Pp3c14_16840	T2I1.1; receptor-related protein kinase-like protein	4	7	1365	0	0	1051
2420	Pp3c20_880V3.1	Pp3c20_880	integral membrane protein	4	4	501	0	0	6
2423	Pp3c20_880V3.2	Pp3c20_880	integral membrane protein	4	4	501	0	0	6
2424	Pp3c20_880V3.3	Pp3c20_880	integral membrane protein	4	4	501	0	0	6
2425	Pp3c20_880V3.6	Pp3c20_880	integral membrane protein	4	4	501	0	0	6
2804	PAC:32946108.CDS.1	Pp3c20_15760	protein fun34	4	4	207	0	0	0
2932	PAC:32966341.CDS.1	Pp3c8_14320	serine-threonine protein kinase, plant-type, putative	4	4	467	0	0	15
2933	PAC:32966342.CDS.1	Pp3c8_14320	serine-threonine protein kinase, plant-type, putative	4	4	467	0	0	15
2934	PAC:32966343.CDS.1	Pp3c8_14320	serine-threonine protein kinase, plant-type, putative	4	4	467	0	0	15
2935	PAC:32966339.CDS.1	Pp3c8_14320	serine-threonine protein kinase, plant-type, putative	4	4	467	0	0	15
2936	PAC:32966340.CDS.1	Pp3c8_14320	serine-threonine protein kinase, plant-type, putative	4	4	467	0	0	15
3020	Pp3c16_22490V3.2	Pp3c16_22490	integral membrane	4	4	397	0	0	100
3023	Pp3c16_22490V3.1	Pp3c16_22490	integral membrane	4	4	397	0	0	100
3029	Pp3c1_22180V3.1	Pp3c1_22180	zinc finger c-x8-c-x5-c-x3-h type family protein	4	4	369	0	0	151
3168	Pp3c8_22340V3.3	Pp3c8_22340	atp binding	4	4	757	0	0	277
3169	Pp3c8_22340V3.2	Pp3c8_22340	atp binding	4	4	757	0	0	277
3170	Pp3c8_22340V3.5	Pp3c8_22340	atp binding	4	4	757	0	0	277
3171	Pp3c8_22340V3.1	Pp3c8_22340	atp binding	4	4	757	0	0	277
3172	Pp3c8_22340V3.4	Pp3c8_22340	atp binding	4	4	757	0	0	277
3310	Pp3c2_2220V3.1	Pp3c2_2220	N/A	4	5	925	0	0	548
3312	Pp3c2_2220V3.3	Pp3c2_2220	N/A	4	5	925	0	0	548
3313	Pp3c2_2220V3.2	Pp3c2_2220	N/A	4	5	767	0	0	390
3336	Pp3c26_4630V3.2	Pp3c26_4630	phosphoenolpyruvate carboxykinase	4	5	664	0	0	323
3337	Pp3c26_4630V3.3	Pp3c26_4630	phosphoenolpyruvate carboxykinase	4	5	664	0	0	323
3338	Pp3c26_4630V3.1	Pp3c26_4630	phosphoenolpyruvate carboxykinase	4	5	664	0	0	323
3810	Pp3c27_1950V3.1	Pp3c27_1950	glutamyl-trna a subunit	4	5	560	0	0	132
3811	Pp3c27_1950V3.4	Pp3c27_1950	glutamyl-trna a subunit	4	5	560	0	0	132
3812	Pp3c27_1950V3.3	Pp3c27_1950	glutamyl-trna a subunit	4	5	560	0	0	132
3813	Pp3c27_1950V3.5	Pp3c27_1950	glutamyl-trna a subunit	4	5	558	0	0	132
3814	Pp3c27_1950V3.2	Pp3c27_1950	glutamyl-trna a subunit	4	5	560	0	0	132
3999	PAC:32911919.CDS.1	Pp3c9_4390	T13C7.15; DNAJ heat shock family protein	4	4	341	0	0	0
4000	PAC:32911920.CDS.1	Pp3c9_4390	T13C7.15; DNAJ heat shock family protein	4	4	341	0	0	0
4195	Pp3c12_4100V3.2	Pp3c12_4100	F14H20.11; peptide transporter (PTR2-B) / oligopeptide transporter 1-1, putative (OPT1-1) [Arabidopsis thaliana]:peptide transport-like protein	4	4	612	0	0	55
4196	Pp3c12_4100V3.1	Pp3c12_4100	F14H20.11; peptide transporter (PTR2-B) / oligopeptide transporter 1-1, putative (OPT1-1) [Arabidopsis thaliana]:peptide transport-like protein	4	4	617	0	0	60
4508	Pp3c2_22070V3.1	Pp3c2_22070	nucleic acid binding	4	4	809	0	0	479
4509	Pp3c2_22070V3.2	Pp3c2_22070	nucleic acid binding	4	4	809	0	0	479
4527	Pp3c18_18430V3.2	Pp3c18_18430	ammonium transporter	4	6	505	0	1	66
4528	Pp3c18_18430V3.1	Pp3c18_18430	ammonium transporter	4	6	505	0	1	66
4599	Pp3c2_17710V3.2	Pp3c2_17710	wd40 repeat-containing protein	4	4	1167	0	1	273
4600	Pp3c2_17710V3.3	Pp3c2_17710	wd40 repeat-containing protein	4	4	1195	0	1	301
4601	Pp3c2_17710V3.1	Pp3c2_17710	wd40 repeat-containing protein	4	4	1167	0	1	273
4734	Pp3c5_19250V3.3	Pp3c5_19250	phosphatidate cytidylyltransferase	4	6	489	0	0	109
4735	Pp3c5_19250V3.1	Pp3c5_19250	phosphatidate cytidylyltransferase	4	6	489	0	0	109
4736	Pp3c5_19250V3.2	Pp3c5_19250	phosphatidate cytidylyltransferase	4	6	489	0	0	109
4737	Pp3c5_19250V3.4	Pp3c5_19250	phosphatidate cytidylyltransferase	4	6	489	0	0	109
4767	Pp3c12_24000V3.2	Pp3c12_24000	pectin methylesterase	4	4	392	0	1	155
4768	Pp3c12_24000V3.1	Pp3c12_24000	pectin methylesterase	4	4	392	0	1	155
4850	Pp3c18_2880V3.1	Pp3c18_2880	N/A	4	6	1573	0	0	175
4851	Pp3c18_2880V3.2	Pp3c18_2880	N/A	4	6	1583	0	0	175
5053	PAC:32909274.CDS.1	Pp3c24_13120	chalcone synthase	4	5	397	0	0	180
5054	PAC:32909273.CDS.1	Pp3c24_13120	chalcone synthase	4	5	397	0	0	180
5242	Pp3c13_20070V3.1	Pp3c13_20070	ca2+ antiporter cation exchanger	4	4	419	0	1	0
5243	Pp3c13_20070V3.2	Pp3c13_20070	ca2+ antiporter cation exchanger	4	4	419	0	1	0
5526	PAC:32966910.CDS.1	Pp3c1_9270	atp-dependent rna	4	5	1219	0	0	500
5527	PAC:32966909.CDS.1	Pp3c1_9270	atp-dependent rna	4	5	1219	0	0	500
5624	Pp3c8_25010V3.2	Pp3c8_25010	integral membrane protein	4	4	521	0	0	0
5625	Pp3c8_25010V3.1	Pp3c8_25010	integral membrane protein	4	4	521	0	0	0
5765	Pp3c24_1830V3.5	Pp3c24_1830	ethanolamine kinase a	4	4	418	0	1	0
5766	Pp3c24_1830V3.2	Pp3c24_1830	ethanolamine kinase a	4	4	418	0	1	0
5767	Pp3c24_1830V3.1	Pp3c24_1830	ethanolamine kinase a	4	4	380	0	1	0
5768	Pp3c24_1830V3.4	Pp3c24_1830	ethanolamine kinase a	4	4	418	0	1	0
5769	Pp3c24_1830V3.3	Pp3c24_1830	ethanolamine kinase a	4	4	418	0	1	0
5917	Pp3c14_3770V3.4	Pp3c14_3770	ornithine aminotransferase	4	4	493	0	0	138
5919	Pp3c14_3770V3.3	Pp3c14_3770	ornithine aminotransferase	4	4	493	0	0	138
5921	Pp3c14_3770V3.2	Pp3c14_3770	ornithine aminotransferase	4	4	493	0	0	138
5922	Pp3c14_3770V3.10	Pp3c14_3770	ornithine aminotransferase	4	4	445	0	0	138
5924	Pp3c14_3770V3.1	Pp3c14_3770	ornithine aminotransferase	4	4	493	0	0	138
5925	Pp3c14_3770V3.9	Pp3c14_3770	ornithine aminotransferase	4	4	445	0	0	138
6217	Pp3c6_20180V3.1	Pp3c6_20180	MCD7.1; pumilio-family RNA-binding protein, putative [Arabidopsis thaliana]	4	5	973	0	0	42
6218	Pp3c6_20180V3.2	Pp3c6_20180	MCD7.1; pumilio-family RNA-binding protein, putative [Arabidopsis thaliana]	4	5	973	0	0	42
6324	Pp3c25_1058V3.2	Pp3c25_1058	N/A	4	7	1247	0	0	4
6325	Pp3c25_1058V3.1	Pp3c25_1058	N/A	4	7	1295	0	0	4
6739	Pp3c20_11000V3.3	Pp3c20_11000	F25A4.25; nodulin family protein [Arabidopsis thaliana]	4	7	601	0	0	373
6740	Pp3c20_11000V3.2	Pp3c20_11000	F25A4.25; nodulin family protein [Arabidopsis thaliana]	4	7	601	0	0	373
6741	Pp3c20_11000V3.1	Pp3c20_11000	F25A4.25; nodulin family protein [Arabidopsis thaliana]	4	7	601	0	0	373
7089	Pp3c5_2897V3.1	Pp3c5_2897	N/A	4	9	3801	0	1	3130
7139	PAC:32957183.CDS.1	Pp3c11_15260	ethylene-insensitive 3d	4	4	677	0	0	476
7140	PAC:32957182.CDS.1	Pp3c11_15260	ethylene-insensitive 3d	4	4	677	0	0	476
7319	Pp3c27_7320V3.1	Pp3c27_7320	alanyl-trna synthetase	4	7	974	0	0	93
7320	Pp3c27_7320V3.2	Pp3c27_7320	alanyl-trna synthetase	4	7	974	0	0	93
7472	Pp3c10_2650V3.3	Pp3c10_2650	ca2+ antiporter cation exchanger	4	4	455	0	1	0
7473	Pp3c10_2650V3.10	Pp3c10_2650	ca2+ antiporter cation exchanger	4	4	464	0	1	5
7474	Pp3c10_2650V3.7	Pp3c10_2650	ca2+ antiporter cation exchanger	4	4	464	0	1	5
7475	Pp3c10_2650V3.9	Pp3c10_2650	ca2+ antiporter cation exchanger	4	4	464	0	1	5
7476	Pp3c10_2650V3.1	Pp3c10_2650	ca2+ antiporter cation exchanger	4	4	464	0	1	5
7477	Pp3c10_2650V3.8	Pp3c10_2650	ca2+ antiporter cation exchanger	4	4	464	0	1	5
7478	Pp3c10_2650V3.2	Pp3c10_2650	ca2+ antiporter cation exchanger	4	4	375	0	1	0
7479	Pp3c10_2650V3.5	Pp3c10_2650	ca2+ antiporter cation exchanger	4	4	455	0	1	0
7480	Pp3c10_2650V3.6	Pp3c10_2650	ca2+ antiporter cation exchanger	4	4	455	0	1	0
7481	Pp3c10_2650V3.11	Pp3c10_2650	ca2+ antiporter cation exchanger	4	4	470	0	1	5
7482	Pp3c10_2650V3.4	Pp3c10_2650	ca2+ antiporter cation exchanger	4	4	455	0	1	0
7829	Pp3c18_5400V3.2	Pp3c18_5400	N/A	4	5	377	0	0	160
7830	Pp3c18_5400V3.1	Pp3c18_5400	N/A	4	5	377	0	0	160
7860	Pp3c4_1480V3.1	Pp3c4_1480	atp binding	4	5	976	0	1	489
7861	Pp3c4_1480V3.2	Pp3c4_1480	atp binding	4	5	976	0	1	489
8031	Pp3c4_27650V3.4	Pp3c4_27650	atp-binding sub-family a member 3	4	12	1889	0	1	385
8032	Pp3c4_27650V3.3	Pp3c4_27650	atp-binding sub-family a member 3	4	12	1637	0	1	133
8033	Pp3c4_27650V3.1	Pp3c4_27650	atp-binding sub-family a member 3	4	12	1889	0	1	385
8034	Pp3c4_27650V3.2	Pp3c4_27650	atp-binding sub-family a member 3	4	9	1202	0	1	133
8107	Pp3c1_35100V3.1	Pp3c1_35100	pectate lyase	4	7	516	0	0	0
8108	Pp3c1_35100V3.2	Pp3c1_35100	pectate lyase	4	7	516	0	0	0
8272	Pp3c7_16600V3.2	Pp3c7_16600	N/A	4	5	483	0	0	156
8519	Pp3c10_21693V3.1	Pp3c10_21693	N/A	4	6	1237	0	0	735
8731	Pp3c13_5300V3.1	Pp3c13_5300	peptidyl-prolyl cis-trans isomerase	4	4	245	1	0	10
8732	Pp3c13_5300V3.2	Pp3c13_5300	peptidyl-prolyl cis-trans isomerase	4	4	245	1	0	10
8971	Pp3c16_10420V3.2	Pp3c16_10420	high affinity nitrate transporter	4	4	519	0	0	177
8972	Pp3c16_10420V3.1	Pp3c16_10420	high affinity nitrate transporter	4	4	519	0	0	177
8985	Pp3c27_3630V3.1	Pp3c27_3630	lactoylglutathione glyoxalase	4	4	408	0	0	167
8986	Pp3c27_3630V3.2	Pp3c27_3630	lactoylglutathione glyoxalase	4	4	315	0	0	74
8987	Pp3c27_3630V3.3	Pp3c27_3630	lactoylglutathione glyoxalase	4	4	409	0	0	168
8988	Pp3c27_3630V3.4	Pp3c27_3630	lactoylglutathione glyoxalase	4	4	408	0	0	167
9114	Pp3c6_9060V3.1	Pp3c6_9060	N/A	4	4	324	0	1	111
9115	Pp3c6_9060V3.2	Pp3c6_9060	N/A	4	4	324	0	1	111
9126	Pp3c20_15470V3.4	Pp3c20_15470	abc-1 domain protein	4	8	1099	0	0	653
9127	Pp3c20_15470V3.2	Pp3c20_15470	abc-1 domain protein	4	8	1099	0	0	653
9128	Pp3c20_15470V3.5	Pp3c20_15470	abc-1 domain protein	4	8	1099	0	0	653
9129	Pp3c20_15470V3.3	Pp3c20_15470	abc-1 domain protein	4	8	1099	0	0	653
9130	Pp3c20_15470V3.1	Pp3c20_15470	abc-1 domain protein	4	8	1099	0	0	653
9307	Pp3c19_21550V3.2	Pp3c19_21550	nitrate transporter	4	4	517	0	0	176
9308	Pp3c19_21550V3.1	Pp3c19_21550	nitrate transporter	4	4	517	0	0	176
9506	Pp3c4_23140V3.2	Pp3c4_23140	brassinosteroid insensitive 1-associated receptor kinase 1	4	4	635	0	1	318
9507	Pp3c4_23140V3.1	Pp3c4_23140	brassinosteroid insensitive 1-associated receptor kinase 1	4	4	635	0	1	318
9634	Pp3c21_22560V3.3	Pp3c21_22560	prolyl carboxypeptidase like protein	4	6	404	0	1	110
9635	Pp3c21_22560V3.4	Pp3c21_22560	prolyl carboxypeptidase like protein	4	6	477	0	1	110
9636	Pp3c21_22560V3.6	Pp3c21_22560	prolyl carboxypeptidase like protein	4	6	420	0	1	110
9637	Pp3c21_22560V3.1	Pp3c21_22560	prolyl carboxypeptidase like protein	4	6	483	0	1	110
9638	Pp3c21_22560V3.5	Pp3c21_22560	prolyl carboxypeptidase like protein	4	6	426	0	1	110
9639	Pp3c21_22560V3.7	Pp3c21_22560	prolyl carboxypeptidase like protein	4	6	483	0	1	110
9640	Pp3c21_22560V3.2	Pp3c21_22560	prolyl carboxypeptidase like protein	4	5	363	0	1	110
9727	Pp3c14_4280V3.3	Pp3c14_4280	gamma-secretase subunit aph-1b	4	4	255	0	0	0
9729	Pp3c14_4280V3.5	Pp3c14_4280	gamma-secretase subunit aph-1b	4	4	206	0	0	0
9730	Pp3c14_4280V3.1	Pp3c14_4280	gamma-secretase subunit aph-1b	4	4	255	0	0	0
9731	Pp3c14_4280V3.2	Pp3c14_4280	gamma-secretase subunit aph-1b	4	4	244	0	0	0
9844	Pp3c3_10180V3.7	Pp3c3_10180	ubiquitin-activating enzyme	4	8	1058	0	0	6
9845	PAC:32944458.CDS.1	Pp3c3_10180	ubiquitin-activating enzyme	4	8	1058	0	0	6
9846	Pp3c3_10180V3.4	Pp3c3_10180	ubiquitin-activating enzyme	4	8	1058	0	0	6
9847	Pp3c3_10180V3.5	Pp3c3_10180	ubiquitin-activating enzyme	4	8	1058	0	0	6
9848	Pp3c3_10180V3.6	Pp3c3_10180	ubiquitin-activating enzyme	4	8	1058	0	0	6
9849	PAC:32944459.CDS.1	Pp3c3_10180	ubiquitin-activating enzyme	4	8	1058	0	0	6
9850	PAC:32944457.CDS.1	Pp3c3_10180	ubiquitin-activating enzyme	4	8	1058	0	0	6
9851	PAC:32944464.CDS.1	Pp3c3_10180	ubiquitin-activating enzyme	4	8	1058	0	0	6
9879	Pp3c15_8150V3.3	Pp3c15_8150	chaperone protein	4	4	375	0	0	0
9880	Pp3c15_8150V3.4	Pp3c15_8150	chaperone protein	4	4	394	0	0	0
9881	Pp3c15_8150V3.5	Pp3c15_8150	chaperone protein	4	4	375	0	0	0
9882	Pp3c15_8150V3.1	Pp3c15_8150	chaperone protein	4	4	359	0	0	0
9883	Pp3c15_8150V3.2	Pp3c15_8150	chaperone protein	4	4	359	0	0	0
10147	Pp3c1_20230V3.1	Pp3c1_20230	nucleic acid binding	4	4	777	1	0	448
10148	Pp3c1_20230V3.4	Pp3c1_20230	nucleic acid binding	4	4	716	1	0	387
10159	Pp3c1_33600V3.1	Pp3c1_33600	N/A	4	6	484	0	0	0
10160	Pp3c1_33600V3.2	Pp3c1_33600	N/A	4	6	481	0	0	0
10608	Pp3c21_17660V3.1	Pp3c21_17660	phosphatidylcholine-sterol o-acyltransferase	4	4	551	0	1	90
11063	Pp3c4_2630V3.5	Pp3c4_2630	arogenate dehydrogenase	4	6	440	0	0	171
11396	Pp3c16_17510V3.2	Pp3c16_17510	receptor-like kinase	4	6	839	0	1	494
11397	Pp3c16_17510V3.1	Pp3c16_17510	receptor-like kinase	4	6	839	0	1	494
11437	Pp3c3_26480V3.5	Pp3c3_26480	N/A	4	4	748	0	0	159
11438	Pp3c3_26480V3.4	Pp3c3_26480	N/A	4	4	748	0	0	159
11439	Pp3c3_26480V3.2	Pp3c3_26480	N/A	4	4	748	0	0	159
11440	Pp3c3_26480V3.7	Pp3c3_26480	N/A	4	4	748	0	0	159
11441	Pp3c3_26480V3.9	Pp3c3_26480	N/A	4	4	700	0	0	111
11442	Pp3c3_26480V3.1	Pp3c3_26480	N/A	4	4	748	0	0	159
11443	Pp3c3_26480V3.3	Pp3c3_26480	N/A	4	4	748	0	0	159
11444	Pp3c3_26480V3.10	Pp3c3_26480	N/A	4	4	748	0	0	159
11445	Pp3c3_26480V3.6	Pp3c3_26480	N/A	4	4	748	0	0	159
11446	Pp3c3_26480V3.8	Pp3c3_26480	N/A	4	4	700	0	0	111
11522	Pp3c16_7870V3.1	Pp3c16_7870	s-locus lectin protein kinase family protein	4	4	850	0	0	330
11523	Pp3c16_7870V3.3	Pp3c16_7870	s-locus lectin protein kinase family protein	4	4	889	0	0	369
11524	Pp3c16_7870V3.4	Pp3c16_7870	s-locus lectin protein kinase family protein	4	4	889	0	0	369
11525	Pp3c16_7870V3.2	Pp3c16_7870	s-locus lectin protein kinase family protein	4	4	850	0	0	330
11526	Pp3c16_7870V3.5	Pp3c16_7870	s-locus lectin protein kinase family protein	4	4	889	0	0	369
11527	Pp3c16_7870V3.6	Pp3c16_7870	s-locus lectin protein kinase family protein	4	4	889	0	0	369
11794	Pp3c20_23460V3.3	Pp3c20_23460	beach domain-containing protein:F16M22.7; WD-40 repeat family protein / beige-related [Arabidopsis thaliana]	4	8	2962	0	2	2482
11795	Pp3c20_23460V3.1	Pp3c20_23460	beach domain-containing protein:F16M22.7; WD-40 repeat family protein / beige-related [Arabidopsis thaliana]	4	9	3409	0	2	2929
11796	Pp3c20_23460V3.2	Pp3c20_23460	beach domain-containing protein:F16M22.7; WD-40 repeat family protein / beige-related [Arabidopsis thaliana]	4	9	3409	0	2	2929
12017	Pp3c23_12620V3.1	Pp3c23_12620	glycerol 3-phosphate permease	4	4	568	0	0	5
12018	Pp3c23_12620V3.3	Pp3c23_12620	glycerol 3-phosphate permease	4	4	568	0	0	5
12019	Pp3c23_12620V3.2	Pp3c23_12620	glycerol 3-phosphate permease	4	4	579	0	0	5
12020	Pp3c23_12620V3.9	Pp3c23_12620	glycerol 3-phosphate permease	4	4	579	0	0	5
12021	Pp3c23_12620V3.7	Pp3c23_12620	glycerol 3-phosphate permease	4	4	568	0	0	5
12022	Pp3c23_12620V3.6	Pp3c23_12620	glycerol 3-phosphate permease	4	4	579	0	0	5
12023	Pp3c23_12620V3.8	Pp3c23_12620	glycerol 3-phosphate permease	4	4	568	0	0	5
12024	Pp3c23_12620V3.5	Pp3c23_12620	glycerol 3-phosphate permease	4	4	579	0	0	5
12025	Pp3c23_12620V3.4	Pp3c23_12620	glycerol 3-phosphate permease	4	4	579	0	0	5
12186	PAC:32946989.CDS.1	Pp3c20_16970	N/A	4	4	865	0	0	503
12187	PAC:32946988.CDS.1	Pp3c20_16970	N/A	4	4	865	0	0	503
12323	PAC:32957953.CDS.1	Pp3c11_2920	T3G21.16; expressed protein [Arabidopsis thaliana]	4	4	639	0	0	356
12324	PAC:32957954.CDS.1	Pp3c11_2920	T3G21.16; expressed protein [Arabidopsis thaliana]	4	4	639	0	0	356
12403	Pp3c18_18460V3.2	Pp3c18_18460	ammonium transporter	4	7	504	0	1	66
12404	Pp3c18_18460V3.1	Pp3c18_18460	ammonium transporter	4	7	504	0	1	66
12487	Pp3c25_14360V3.4	Pp3c25_14360	n-rich protein	4	7	1223	0	0	65
12489	Pp3c25_14360V3.1	Pp3c25_14360	n-rich protein	4	6	1238	0	0	172
12490	Pp3c25_14360V3.3	Pp3c25_14360	n-rich protein	4	7	1341	0	0	65
12491	Pp3c25_14360V3.2	Pp3c25_14360	n-rich protein	4	7	1341	0	0	65
12562	Pp3c4_23740V3.8	Pp3c4_23740	N/A	4	8	1807	0	0	279
12563	Pp3c4_23740V3.7	Pp3c4_23740	N/A	4	8	1804	0	0	280
12564	Pp3c4_23740V3.2	Pp3c4_23740	N/A	4	8	1803	0	0	279
12565	Pp3c4_23740V3.4	Pp3c4_23740	N/A	4	8	1808	0	0	280
12566	Pp3c4_23740V3.3	Pp3c4_23740	N/A	4	8	1802	0	0	278
12567	Pp3c4_23740V3.6	Pp3c4_23740	N/A	4	8	1807	0	0	279
12568	Pp3c4_23740V3.1	Pp3c4_23740	N/A	4	8	1803	0	0	279
12569	Pp3c4_23740V3.5	Pp3c4_23740	N/A	4	8	1807	0	0	279
13634	Pp3c12_23520V3.2	Pp3c12_23520	esterase lipase thioesterase active site	4	9	1121	0	0	911
13635	Pp3c12_23520V3.1	Pp3c12_23520	esterase lipase thioesterase active site	4	9	1121	0	0	911
13980	Pp3c1_9320V3.11	Pp3c1_9320	nodulation receptor kinase	4	5	804	0	0	398
13981	Pp3c1_9320V3.2	Pp3c1_9320	nodulation receptor kinase	4	5	828	0	0	422
13982	Pp3c1_9320V3.18	Pp3c1_9320	nodulation receptor kinase	4	5	804	0	0	398
13983	Pp3c1_9320V3.7	Pp3c1_9320	nodulation receptor kinase	4	5	828	0	0	422
13984	Pp3c1_9320V3.15	Pp3c1_9320	nodulation receptor kinase	4	5	804	0	0	398
13985	Pp3c1_9320V3.5	Pp3c1_9320	nodulation receptor kinase	4	5	828	0	0	422
13986	Pp3c1_9320V3.6	Pp3c1_9320	nodulation receptor kinase	4	5	828	0	0	422
13987	Pp3c1_9320V3.3	Pp3c1_9320	nodulation receptor kinase	4	5	828	0	0	422
13988	Pp3c1_9320V3.14	Pp3c1_9320	nodulation receptor kinase	4	5	804	0	0	398
13989	Pp3c1_9320V3.17	Pp3c1_9320	nodulation receptor kinase	4	5	828	0	0	422
13990	Pp3c1_9320V3.10	Pp3c1_9320	nodulation receptor kinase	4	5	804	0	0	398
13991	Pp3c1_9320V3.19	Pp3c1_9320	nodulation receptor kinase	4	5	828	0	0	422
13992	Pp3c1_9320V3.13	Pp3c1_9320	nodulation receptor kinase	4	5	804	0	0	398
13993	Pp3c1_9320V3.12	Pp3c1_9320	nodulation receptor kinase	4	5	804	0	0	398
13994	Pp3c1_9320V3.9	Pp3c1_9320	nodulation receptor kinase	4	5	804	0	0	398
13995	Pp3c1_9320V3.16	Pp3c1_9320	nodulation receptor kinase	4	5	804	0	0	398
13996	Pp3c1_9320V3.8	Pp3c1_9320	nodulation receptor kinase	4	5	804	0	0	398
13997	Pp3c1_9320V3.1	Pp3c1_9320	nodulation receptor kinase	4	5	828	0	0	422
13998	Pp3c1_9320V3.4	Pp3c1_9320	nodulation receptor kinase	4	5	828	0	0	422
14011	Pp3c2_11130V3.1	Pp3c2_11130	threonyl-trna synthetase	4	4	703	0	0	440
14012	Pp3c2_11130V3.2	Pp3c2_11130	threonyl-trna synthetase	4	4	625	0	0	362
14013	Pp3c2_11130V3.3	Pp3c2_11130	threonyl-trna synthetase	4	4	703	0	0	440
15182	Pp3c24_6511V3.1	Pp3c24_6511	N/A	4	4	779	0	0	383
15183	Pp3c24_6511V3.4	Pp3c24_6511	N/A	4	4	741	0	0	383
15184	Pp3c24_6511V3.5	Pp3c24_6511	N/A	4	4	772	0	0	376
15185	Pp3c24_6511V3.3	Pp3c24_6511	N/A	4	4	779	0	0	383
15186	Pp3c24_6511V3.2	Pp3c24_6511	N/A	4	4	779	0	0	383
15467	Pp3c26_3790V3.2	Pp3c26_3790	brassinosteroid insensitive 1-associated receptor kinase 1	4	4	635	0	1	318
15468	Pp3c26_3790V3.1	Pp3c26_3790	brassinosteroid insensitive 1-associated receptor kinase 1	4	4	635	0	1	318
15469	Pp3c3_31900V3.2	Pp3c3_31900	pip2_2 gene for putative plasma membrane aquaporin protein PIP2_2:plasma membrane aquaporin	4	4	279	0	0	25
15470	Pp3c3_31900V3.5	Pp3c3_31900	pip2_2 gene for putative plasma membrane aquaporin protein PIP2_2:plasma membrane aquaporin	4	4	279	0	0	25
15471	Pp3c3_31900V3.1	Pp3c3_31900	pip2_2 gene for putative plasma membrane aquaporin protein PIP2_2:plasma membrane aquaporin	4	4	279	0	0	25
15472	Pp3c3_31900V3.4	Pp3c3_31900	pip2_2 gene for putative plasma membrane aquaporin protein PIP2_2:plasma membrane aquaporin	4	4	238	0	0	0
15473	Pp3c3_31900V3.3	Pp3c3_31900	pip2_2 gene for putative plasma membrane aquaporin protein PIP2_2:plasma membrane aquaporin	4	4	279	0	0	25
15641	PAC:32947299.CDS.1	Pp3c20_8630	membrane protein	4	4	362	0	1	46
15642	PAC:32947300.CDS.1	Pp3c20_8630	membrane protein	4	4	362	0	1	46
15649	Pp3c5_3180V3.1	Pp3c5_3180	lactoylglutathione glyoxalase	4	5	355	0	0	114
15650	Pp3c5_3180V3.2	Pp3c5_3180	lactoylglutathione glyoxalase	4	5	355	0	0	114
15683	Pp3c23_5290V3.1	Pp3c23_5290	deah (asp-glu-ala-his) box polypeptide 38	4	4	1245	0	0	511
15684	Pp3c23_5290V3.2	Pp3c23_5290	deah (asp-glu-ala-his) box polypeptide 38	4	4	1245	0	0	511
15685	Pp3c23_5290V3.3	Pp3c23_5290	deah (asp-glu-ala-his) box polypeptide 38	4	4	1123	0	0	511
15958	Pp3c11_18760V3.4	Pp3c11_18760	ankyrin repeat domain protein	4	6	1036	0	0	723
15959	Pp3c11_18760V3.2	Pp3c11_18760	ankyrin repeat domain protein	4	6	982	0	0	669
15960	Pp3c11_18760V3.1	Pp3c11_18760	ankyrin repeat domain protein	4	6	982	0	0	669
15961	Pp3c11_18760V3.3	Pp3c11_18760	ankyrin repeat domain protein	4	6	982	0	0	669
15962	Pp3c11_18760V3.5	Pp3c11_18760	ankyrin repeat domain protein	4	6	982	0	0	669
15963	Pp3c11_18760V3.6	Pp3c11_18760	ankyrin repeat domain protein	4	6	1036	0	0	723
16079	Pp3c24_11150V3.1	Pp3c24_11150	ntmc2type1.1 gene for putative protein NTMC2Type1.1	4	5	538	0	0	8
16154	Pp3c22_17590V3.6	Pp3c22_17590	:contains EST C72594(E1889) similar to Arabidopsis thaliana chromosome 1, F25I16.5 unknown protein [Oryza sativa (japonica cultivar-group)]	4	4	880	0	0	553
16156	Pp3c22_17590V3.5	Pp3c22_17590	:contains EST C72594(E1889) similar to Arabidopsis thaliana chromosome 1, F25I16.5 unknown protein [Oryza sativa (japonica cultivar-group)]	4	6	1155	0	0	647
16188	PAC:32936489.CDS.1	Pp3c2_27130	N/A	4	5	1227	0	0	508
16189	PAC:32936488.CDS.1	Pp3c2_27130	N/A	4	5	1227	0	0	508
16221	Pp3c1_4470V3.1	Pp3c1_4470	F10K1.1; expressed protein	4	5	667	0	1	0
16222	Pp3c1_4470V3.2	Pp3c1_4470	F10K1.1; expressed protein	4	5	667	0	1	0
16589	Pp3c24_15670V3.2	Pp3c24_15670	F13B4.26; glyceraldehyde 3-phosphate dehydrogenase, cytosolic, putative / NAD-dependent glyceraldehyde-3-phosphate dehydrogenase, putative [EC:1.2.1.12] [KO:K00134] [Arabidopsis thaliana]	4	4	359	0	0	0
16590	Pp3c24_15670V3.1	Pp3c24_15670	F13B4.26; glyceraldehyde 3-phosphate dehydrogenase, cytosolic, putative / NAD-dependent glyceraldehyde-3-phosphate dehydrogenase, putative [EC:1.2.1.12] [KO:K00134] [Arabidopsis thaliana]	4	4	359	0	0	0
16707	Pp3c14_13300V3.5	Pp3c14_13300	glucose-6-phosphate 1-dehydrogenase	4	5	599	0	0	123
16708	Pp3c14_13300V3.4	Pp3c14_13300	glucose-6-phosphate 1-dehydrogenase	4	5	608	0	0	132
16709	Pp3c14_13300V3.2	Pp3c14_13300	glucose-6-phosphate 1-dehydrogenase	4	5	599	0	0	123
16710	Pp3c14_13300V3.3	Pp3c14_13300	glucose-6-phosphate 1-dehydrogenase	4	5	599	0	0	123
16711	Pp3c14_13300V3.1	Pp3c14_13300	glucose-6-phosphate 1-dehydrogenase	4	5	599	0	0	123
16814	PAC:32963404.CDS.1	Pp3c8_6310	T16B12.3; expressed protein [Arabidopsis thaliana]	4	4	289	0	0	23
16815	PAC:32963403.CDS.1	Pp3c8_6310	T16B12.3; expressed protein [Arabidopsis thaliana]	4	4	289	0	0	23
16816	PAC:32963405.CDS.1	Pp3c8_6310	T16B12.3; expressed protein [Arabidopsis thaliana]	4	4	289	0	0	23
16818	Pp3c10_2340V3.1	Pp3c10_2340	receptor protein	4	5	917	0	1	568
16819	Pp3c10_2340V3.2	Pp3c10_2340	receptor protein	4	5	917	0	1	568
17079	Pp3c1_32540V3.3	Pp3c1_32540	atp binding	4	5	768	0	0	529
17080	Pp3c1_32540V3.1	Pp3c1_32540	atp binding	4	5	898	0	0	659
17081	Pp3c1_32540V3.2	Pp3c1_32540	atp binding	4	5	898	0	0	659
17191	Pp3c9_910V3.2	Pp3c9_910	eukaryotic peptide chain release factor subunit 1-1	4	8	442	0	0	0
17192	Pp3c9_910V3.3	Pp3c9_910	eukaryotic peptide chain release factor subunit 1-1	4	7	390	0	0	162
17193	Pp3c9_910V3.1	Pp3c9_910	eukaryotic peptide chain release factor subunit 1-1	4	8	442	0	0	0
17197	Pp3c3_37820V3.6	Pp3c3_37820	mgc81115 protein	4	6	746	0	0	474
17198	Pp3c3_37820V3.2	Pp3c3_37820	mgc81115 protein	4	6	742	0	0	470
17199	Pp3c3_37820V3.5	Pp3c3_37820	mgc81115 protein	4	6	746	0	0	474
17200	Pp3c3_37820V3.4	Pp3c3_37820	mgc81115 protein	4	6	746	0	0	474
17201	Pp3c3_37820V3.1	Pp3c3_37820	mgc81115 protein	4	6	742	0	0	470
17202	Pp3c3_37820V3.8	Pp3c3_37820	mgc81115 protein	4	7	804	0	0	532
17203	Pp3c3_37820V3.9	Pp3c3_37820	mgc81115 protein	4	6	746	0	0	474
17204	Pp3c3_37820V3.7	Pp3c3_37820	mgc81115 protein	4	7	800	0	0	528
17205	Pp3c3_37820V3.3	Pp3c3_37820	mgc81115 protein	4	6	742	0	0	470
17344	Pp3c12_5490V3.2	Pp3c12_5490	auxin influx carrier component	4	6	467	0	0	239
17345	Pp3c12_5490V3.1	Pp3c12_5490	auxin influx carrier component	4	6	467	0	0	239
17389	Pp3c1_33470V3.19	Pp3c1_33470	K2A11.7; expressed protein	4	4	447	0	0	230
17390	Pp3c1_33470V3.22	Pp3c1_33470	K2A11.7; expressed protein	4	4	447	0	0	230
17393	Pp3c1_33470V3.13	Pp3c1_33470	K2A11.7; expressed protein	4	4	516	0	0	230
17395	Pp3c1_33470V3.11	Pp3c1_33470	K2A11.7; expressed protein	4	4	512	0	0	226
17397	Pp3c1_33470V3.14	Pp3c1_33470	K2A11.7; expressed protein	4	4	516	0	0	230
17401	Pp3c1_33470V3.7	Pp3c1_33470	K2A11.7; expressed protein	4	4	516	0	0	230
17403	Pp3c1_33470V3.23	Pp3c1_33470	K2A11.7; expressed protein	4	4	516	0	0	230
17405	Pp3c1_33470V3.20	Pp3c1_33470	K2A11.7; expressed protein	4	4	447	0	0	230
17406	Pp3c1_33470V3.12	Pp3c1_33470	K2A11.7; expressed protein	4	4	512	0	0	226
17411	Pp3c1_33470V3.21	Pp3c1_33470	K2A11.7; expressed protein	4	4	447	0	0	230
17503	Pp3c15_6610V3.3	Pp3c15_6610	N/A	4	4	233	0	1	25
17505	Pp3c15_6610V3.4	Pp3c15_6610	N/A	4	4	224	0	1	16
17506	Pp3c15_6610V3.2	Pp3c15_6610	N/A	4	4	213	0	1	5
17641	Pp3c13_16620V3.2	Pp3c13_16620	fumarylacetoacetate hydrolase	4	4	426	0	0	214
17642	Pp3c13_16620V3.4	Pp3c13_16620	fumarylacetoacetate hydrolase	4	4	311	0	0	99
17643	Pp3c13_16620V3.1	Pp3c13_16620	fumarylacetoacetate hydrolase	4	4	426	0	0	214
17701	PAC:32935113.CDS.1	Pp3c2_27820	N/A	4	5	363	0	0	7
17702	Pp3c2_27820V3.1	Pp3c2_27820	N/A	4	4	324	0	0	7
17703	PAC:32935114.CDS.1	Pp3c2_27820	N/A	4	5	363	0	0	7
17734	Pp3c1_18530V3.1	Pp3c1_18530	N/A	4	5	1016	0	0	697
17735	Pp3c1_18530V3.2	Pp3c1_18530	N/A	4	5	1016	0	0	697
17789	Pp3c3_18780V3.3	Pp3c3_18780	T28P6.3; expressed protein [Arabidopsis thaliana]	4	4	567	0	0	7
17790	Pp3c3_18780V3.2	Pp3c3_18780	T28P6.3; expressed protein [Arabidopsis thaliana]	4	4	774	0	0	7
17791	Pp3c3_18780V3.1	Pp3c3_18780	T28P6.3; expressed protein [Arabidopsis thaliana]	4	4	774	0	0	7
18113	Pp3c6_26100V3.2	Pp3c6_26100	wd repeat and fyve domain containing 3 isoform 1	4	9	3804	0	1	3131
18114	Pp3c6_26100V3.1	Pp3c6_26100	wd repeat and fyve domain containing 3 isoform 1	4	9	3804	0	1	3131
18370	Pp3c10_9800V3.1	Pp3c10_9800	autophagy protein 9	4	4	861	0	1	635
18371	Pp3c10_9800V3.3	Pp3c10_9800	autophagy protein 9	4	4	861	0	1	635
18372	Pp3c10_9800V3.2	Pp3c10_9800	autophagy protein 9	4	4	861	0	1	635
18381	Pp3c12_5420V3.1	Pp3c12_5420	N/A	4	4	305	0	0	62
18596	Pp3c1_26780V3.2	Pp3c1_26780	ca2+ antiporter cation exchanger	4	4	439	1	1	0
18597	Pp3c1_26780V3.1	Pp3c1_26780	ca2+ antiporter cation exchanger	4	4	439	1	1	0
18643	Pp3c13_21450V3.2	Pp3c13_21450	alcohol dehydrogenase 1	4	4	385	0	0	43
18644	Pp3c13_21450V3.3	Pp3c13_21450	alcohol dehydrogenase 1	4	4	385	0	0	43
18645	Pp3c13_21450V3.1	Pp3c13_21450	alcohol dehydrogenase 1	4	4	385	0	0	43
18719	Pp3c22_13120V3.2	Pp3c22_13120	phosphatidylcholine-sterol o-acyltransferase	4	4	577	0	1	101
18720	Pp3c22_13120V3.1	Pp3c22_13120	phosphatidylcholine-sterol o-acyltransferase	4	4	577	0	1	101
19315	Pp3c2_9350V3.5	Pp3c2_9350	N/A	4	6	525	0	0	0
19316	Pp3c2_9350V3.6	Pp3c2_9350	N/A	4	5	424	0	0	0
19317	Pp3c2_9350V3.2	Pp3c2_9350	N/A	4	6	525	0	0	0
19319	Pp3c2_9350V3.7	Pp3c2_9350	N/A	4	6	524	0	0	0
19320	Pp3c2_9350V3.1	Pp3c2_9350	N/A	4	6	525	0	0	0
19321	Pp3c2_9350V3.3	Pp3c2_9350	N/A	4	6	512	0	0	0
19522	Pp3c13_11180V3.2	Pp3c13_11180	abc1 family protein	4	5	571	0	0	0
19523	Pp3c13_11180V3.1	Pp3c13_11180	abc1 family protein	4	5	571	0	0	0
19524	Pp3c13_11180V3.4	Pp3c13_11180	abc1 family protein	4	5	571	0	0	0
19525	Pp3c13_11180V3.3	Pp3c13_11180	abc1 family protein	4	5	571	0	0	0
19613	Pp3c16_15140V3.1	Pp3c16_15140	F23M19.3; expressed protein [Arabidopsis thaliana]	4	6	696	0	0	35
19614	Pp3c16_15140V3.3	Pp3c16_15140	F23M19.3; expressed protein [Arabidopsis thaliana]	4	6	696	0	0	35
19615	Pp3c16_15140V3.2	Pp3c16_15140	F23M19.3; expressed protein [Arabidopsis thaliana]	4	6	696	0	0	35
19747	Pp3c1_26960V3.1	Pp3c1_26960	T3F20.25; leucine-rich repeat family protein / protein kinase family protein	4	5	902	0	0	560
19748	Pp3c1_26960V3.2	Pp3c1_26960	T3F20.25; leucine-rich repeat family protein / protein kinase family protein	4	5	928	0	0	586
20929	Pp3c13_22230V3.1	Pp3c13_22230	aspartate expressed	4	5	472	0	0	269
20930	Pp3c13_22230V3.3	Pp3c13_22230	aspartate expressed	4	5	472	0	0	269
20931	Pp3c13_22230V3.2	Pp3c13_22230	aspartate expressed	4	5	472	0	0	269
21111	Pp3c19_10950V3.2	Pp3c19_10950	nrt2_4 gene for high affinity nitrate transporter protein NRT2_4	4	4	548	0	0	211
21112	Pp3c19_10950V3.1	Pp3c19_10950	nrt2_4 gene for high affinity nitrate transporter protein NRT2_4	4	4	548	0	0	211
21815	Pp3c4_510V3.3	Pp3c4_510	pip2_3 gene for putative aquaporin family protein PIP2_3:mip pip subfamily	4	4	280	0	0	26
21816	Pp3c4_510V3.1	Pp3c4_510	pip2_3 gene for putative aquaporin family protein PIP2_3:mip pip subfamily	4	4	280	0	0	26
21817	Pp3c4_510V3.2	Pp3c4_510	pip2_3 gene for putative aquaporin family protein PIP2_3:mip pip subfamily	4	4	280	0	0	26
21936	Pp3c23_15370V3.1	Pp3c23_15370	chaperone protein	4	4	455	0	0	2
21937	Pp3c23_15370V3.2	Pp3c23_15370	chaperone protein	4	4	462	0	0	9
21938	Pp3c23_15370V3.4	Pp3c23_15370	chaperone protein	4	4	462	0	0	9
21939	Pp3c23_15370V3.3	Pp3c23_15370	chaperone protein	4	4	462	0	0	9
22457	Pp3c7_8766V3.6	Pp3c7_8766	N/A	4	4	468	0	0	206
22458	Pp3c7_8766V3.4	Pp3c7_8766	N/A	4	4	423	0	0	161
22459	Pp3c7_8766V3.2	Pp3c7_8766	N/A	4	4	468	0	0	206
22460	Pp3c7_8766V3.1	Pp3c7_8766	N/A	4	4	468	0	0	206
22461	Pp3c7_8766V3.5	Pp3c7_8766	N/A	4	4	468	0	0	206
22462	Pp3c7_8766V3.3	Pp3c7_8766	N/A	4	4	423	0	0	161
22525	Pp3c25_2610V3.2	Pp3c25_2610	:phy1 gene for phytochrome protein PHY1	4	6	1123	0	0	597
22526	Pp3c25_2610V3.1	Pp3c25_2610	:phy1 gene for phytochrome protein PHY1	4	6	1123	0	0	597
23015	Pp3c1_7450V3.1	Pp3c1_7450	protein kinase	4	5	553	0	0	185
23016	Pp3c1_7450V3.2	Pp3c1_7450	protein kinase	4	5	553	0	0	185
23557	Pp3c14_7450V3.12	Pp3c14_7450	acyl- thioesterase ii	4	4	458	0	0	0
23579	Pp3c1_25750V3.2	Pp3c1_25750	hypothetical protein [Cryptosporidium hominis]	4	5	666	0	0	45
23580	Pp3c1_25750V3.1	Pp3c1_25750	hypothetical protein [Cryptosporidium hominis]	4	5	666	0	0	45
23581	Pp3c1_25750V3.8	Pp3c1_25750	hypothetical protein [Cryptosporidium hominis]	4	5	597	0	0	0
23582	Pp3c1_25750V3.5	Pp3c1_25750	hypothetical protein [Cryptosporidium hominis]	4	5	666	0	0	45
23583	Pp3c1_25750V3.4	Pp3c1_25750	hypothetical protein [Cryptosporidium hominis]	4	5	666	0	0	45
23584	Pp3c1_25750V3.3	Pp3c1_25750	hypothetical protein [Cryptosporidium hominis]	4	5	666	0	0	45
23585	Pp3c1_25750V3.6	Pp3c1_25750	hypothetical protein [Cryptosporidium hominis]	4	5	666	0	0	45
23586	Pp3c1_25750V3.7	Pp3c1_25750	hypothetical protein [Cryptosporidium hominis]	4	5	700	0	0	45
23596	Pp3c26_12240V3.3	Pp3c26_12240	chlorophyll a b binding:light-harvesting complex ii protein lhcb5	4	4	297	0	0	80
23597	Pp3c26_12240V3.1	Pp3c26_12240	chlorophyll a b binding:light-harvesting complex ii protein lhcb5	4	4	297	0	0	80
23692	Pp3c10_21680V3.1	Pp3c10_21680	nls-tir-nbs-lrr resistance protein	4	6	1430	0	0	735
23793	Pp3c22_9060V3.1	Pp3c22_9060	nrt2_5 gene for high affinity nitrate transporter protein NRT2_5	4	4	517	0	0	175
23794	Pp3c22_9060V3.2	Pp3c22_9060	nrt2_5 gene for high affinity nitrate transporter protein NRT2_5	4	4	517	0	0	175
23795	Pp3c22_9060V3.3	Pp3c22_9060	nrt2_5 gene for high affinity nitrate transporter protein NRT2_5	4	4	526	0	0	184
23925	Pp3c15_17310V3.1	Pp3c15_17310	receptor protein	4	4	976	0	1	618
23975	Pp3c4_28860V3.2	Pp3c4_28860	minor histocompatibility antigen h13	4	5	367	0	0	134
23976	Pp3c4_28860V3.3	Pp3c4_28860	minor histocompatibility antigen h13	4	5	501	0	0	268
23977	Pp3c4_28860V3.1	Pp3c4_28860	minor histocompatibility antigen h13	4	5	501	0	0	268
24153	PAC:32931235.CDS.1	Pp3c13_19370	MPN9.20; zinc finger (C3HC4-type RING finger) family protein	4	4	438	0	1	0
24154	PAC:32931234.CDS.1	Pp3c13_19370	MPN9.20; zinc finger (C3HC4-type RING finger) family protein	4	4	438	0	1	0
24365	PAC:32900550.CDS.1	Pp3c10_5670	at5g27210 t21b4_120	4	4	304	0	0	50
24366	PAC:32900549.CDS.1	Pp3c10_5670	at5g27210 t21b4_120	4	4	304	0	0	50
24411	Pp3c16_2270V3.3	Pp3c16_2270	type ii inositol 5-	4	9	1313	0	0	804
24412	Pp3c16_2270V3.4	Pp3c16_2270	type ii inositol 5-	4	8	1115	0	0	804
24413	Pp3c16_2270V3.5	Pp3c16_2270	type ii inositol 5-	4	9	1313	0	0	804
24414	Pp3c16_2270V3.1	Pp3c16_2270	type ii inositol 5-	4	6	951	0	0	442
24415	Pp3c16_2270V3.2	Pp3c16_2270	type ii inositol 5-	4	9	1313	0	0	804
24682	Pp3c21_20650V3.1	Pp3c21_20650	chalcone synthase	4	5	405	0	0	189
24683	Pp3c21_20650V3.2	Pp3c21_20650	chalcone synthase	4	5	405	0	0	189
24723	Pp3c11_10560V3.3	Pp3c11_10560	pectate lyase	4	5	569	0	0	307
24724	Pp3c11_10560V3.1	Pp3c11_10560	pectate lyase	4	5	569	0	0	307
25087	Pp3c22_22230V3.1	Pp3c22_22230	sodium phosphate symporter	4	5	639	0	1	0
25117	Pp3c18_4470V3.1	Pp3c18_4470	N/A	4	4	435	0	1	0
25118	Pp3c18_4470V3.2	Pp3c18_4470	N/A	4	6	619	0	1	0
25251	Pp3c16_10340V3.1	Pp3c16_10340	putative AAA-type ATPase	4	6	689	0	0	0
25252	Pp3c16_10340V3.3	Pp3c16_10340	putative AAA-type ATPase	4	6	689	0	0	0
25481	Pp3c2_20160V3.1	Pp3c2_20160	sulfate transporter	4	6	469	0	0	223
25482	Pp3c2_20160V3.3	Pp3c2_20160	sulfate transporter	4	6	469	0	0	223
25483	Pp3c2_20160V3.4	Pp3c2_20160	sulfate transporter	4	5	398	0	0	152
25484	Pp3c2_20160V3.2	Pp3c2_20160	sulfate transporter	4	6	469	0	0	223
25485	Pp3c2_20160V3.6	Pp3c2_20160	sulfate transporter	4	5	423	0	0	177
25679	Pp3c17_13010V3.2	Pp3c17_13010	2-oxoglutarate malate translocator	4	6	606	0	0	368
25680	Pp3c17_13010V3.1	Pp3c17_13010	2-oxoglutarate malate translocator	4	6	606	0	0	368
25811	Pp3c7_13340V3.2	Pp3c7_13340	nrt2_3 gene for high affinity nitrate transporter protein NRT2_3	4	4	549	0	1	208
25812	Pp3c7_13340V3.1	Pp3c7_13340	nrt2_3 gene for high affinity nitrate transporter protein NRT2_3	4	4	549	0	1	208
25813	Pp3c7_13340V3.3	Pp3c7_13340	nrt2_3 gene for high affinity nitrate transporter protein NRT2_3	4	4	549	0	1	208
25814	Pp3c7_13340V3.4	Pp3c7_13340	nrt2_3 gene for high affinity nitrate transporter protein NRT2_3	4	4	549	0	1	208
25890	Pp3c24_4410V3.4	Pp3c24_4410	serine threonine-specific protein	4	4	446	0	0	113
25891	Pp3c24_4410V3.1	Pp3c24_4410	serine threonine-specific protein	4	4	446	0	0	113
25892	Pp3c24_4410V3.3	Pp3c24_4410	serine threonine-specific protein	4	4	446	0	0	113
25893	Pp3c24_4410V3.2	Pp3c24_4410	serine threonine-specific protein	4	4	446	0	0	113
25952	Pp3c3_35190V3.1	Pp3c3_35190	pectate lyase	4	4	404	0	0	81
25953	Pp3c3_35190V3.2	Pp3c3_35190	pectate lyase	4	4	404	0	0	81
25954	Pp3c3_35190V3.3	Pp3c3_35190	pectate lyase	4	4	404	0	0	81
26052	Pp3c22_1880V3.7	Pp3c22_1880	biopterin transport-related protein bt1	4	5	384	0	0	45
26053	Pp3c22_1880V3.4	Pp3c22_1880	biopterin transport-related protein bt1	4	5	519	0	0	45
26054	Pp3c22_1880V3.2	Pp3c22_1880	biopterin transport-related protein bt1	4	5	492	0	0	18
26055	Pp3c22_1880V3.8	Pp3c22_1880	biopterin transport-related protein bt1	4	5	407	0	0	68
26056	Pp3c22_1880V3.1	Pp3c22_1880	biopterin transport-related protein bt1	4	5	519	0	0	45
26057	Pp3c22_1880V3.5	Pp3c22_1880	biopterin transport-related protein bt1	4	5	542	0	0	68
26058	Pp3c22_1880V3.6	Pp3c22_1880	biopterin transport-related protein bt1	4	5	496	0	0	22
26059	Pp3c22_1880V3.3	Pp3c22_1880	biopterin transport-related protein bt1	4	5	519	0	0	45
26318	Pp3c22_7290V3.2	Pp3c22_7290	N/A	4	4	423	0	0	182
26319	Pp3c22_7290V3.1	Pp3c22_7290	N/A	4	4	415	0	0	174
26590	Pp3c3_21530V3.2	Pp3c3_21530	F23E12.140; transporter-related	4	5	735	0	0	486
26591	Pp3c3_21530V3.1	Pp3c3_21530	F23E12.140; transporter-related	4	5	735	0	0	486
26652	Pp3c9_10640V3.4	Pp3c9_10640	N/A	4	5	777	0	0	416
26653	Pp3c9_10640V3.3	Pp3c9_10640	N/A	4	5	777	0	0	416
26654	Pp3c9_10640V3.2	Pp3c9_10640	N/A	4	5	777	0	0	416
26655	Pp3c9_10640V3.1	Pp3c9_10640	N/A	4	5	777	0	0	416
26704	Pp3c22_5670V3.1	Pp3c22_5670	cpr5	4	5	791	0	0	254
26705	Pp3c22_5670V3.3	Pp3c22_5670	cpr5	4	6	1033	0	0	496
26706	Pp3c22_5670V3.2	Pp3c22_5670	cpr5	4	6	1033	0	0	496
26857	Pp3c9_15860V3.1	Pp3c9_15860	protein binding	4	14	4777	0	0	0
26858	Pp3c9_15860V3.3	Pp3c9_15860	protein binding	4	14	4733	0	0	0
26859	Pp3c9_15860V3.2	Pp3c9_15860	protein binding	4	14	4777	0	0	0
27166	PAC:32926289.CDS.1	Pp3c7_4420	tir-nbs-lrr resistance protein	4	4	397	0	0	97
27167	PAC:32926288.CDS.1	Pp3c7_4420	tir-nbs-lrr resistance protein	4	4	397	0	0	97
27276	Pp3c10_21510V3.1	Pp3c10_21510	fun34 transmembrane protein	4	4	269	0	0	36
27277	Pp3c10_21510V3.2	Pp3c10_21510	fun34 transmembrane protein	4	4	219	0	0	0
27361	Pp3c5_19220V3.2	Pp3c5_19220	aldehyde oxidase 1	4	9	1363	0	2	1030
27362	Pp3c5_19220V3.1	Pp3c5_19220	aldehyde oxidase 1	4	9	1363	0	2	1030
27414	Pp3c18_17440V3.2	Pp3c18_17440	amino acid transporter	4	5	471	0	0	105
27415	Pp3c18_17440V3.1	Pp3c18_17440	amino acid transporter	4	5	471	0	0	105
27883	Pp3c2_5250V3.1	Pp3c2_5250	glutamate malate translocator	4	5	600	0	0	362
27884	Pp3c2_5250V3.2	Pp3c2_5250	glutamate malate translocator	4	5	600	0	0	362
27916	Pp3c19_10820V3.1	Pp3c19_10820	nrt2_4 gene for high affinity nitrate transporter protein NRT2_4	4	4	548	0	0	211
27917	Pp3c19_10820V3.2	Pp3c19_10820	nrt2_4 gene for high affinity nitrate transporter protein NRT2_4	4	4	548	0	0	211
28506	Pp3c18_4810V3.1	Pp3c18_4810	actin related protein 2 3 subunit 41kda	4	4	380	0	0	77
28507	Pp3c18_4810V3.6	Pp3c18_4810	actin related protein 2 3 subunit 41kda	4	4	380	0	0	77
28508	Pp3c18_4810V3.2	Pp3c18_4810	actin related protein 2 3 subunit 41kda	4	4	380	0	0	77
28509	Pp3c18_4810V3.3	Pp3c18_4810	actin related protein 2 3 subunit 41kda	4	4	380	0	0	77
28510	Pp3c18_4810V3.5	Pp3c18_4810	actin related protein 2 3 subunit 41kda	4	4	380	0	0	77
28511	Pp3c18_4810V3.8	Pp3c18_4810	actin related protein 2 3 subunit 41kda	4	4	337	0	0	56
28512	Pp3c18_4810V3.7	Pp3c18_4810	actin related protein 2 3 subunit 41kda	4	4	380	0	0	77
28513	Pp3c18_4810V3.4	Pp3c18_4810	actin related protein 2 3 subunit 41kda	4	4	380	0	0	77
29881	Pp3c9_9470V3.1	Pp3c9_9470	hypothetical protein, conserved [Cyanidioschyzon merolae]	4	4	319	0	0	88
29883	Pp3c9_9470V3.2	Pp3c9_9470	hypothetical protein, conserved [Cyanidioschyzon merolae]	4	4	319	0	0	88
30792	Pp3c4_22960V3.1	Pp3c4_22960	N/A	4	6	1659	0	0	267
30793	Pp3c4_22960V3.2	Pp3c4_22960	N/A	4	6	1659	0	0	267
31104	Pp3c3_4690V3.2	Pp3c3_4690	triacylglycerol	4	4	539	0	0	332
31105	Pp3c3_4690V3.1	Pp3c3_4690	triacylglycerol	4	4	539	0	0	332
31229	Pp3c8_6120V3.2	Pp3c8_6120	N/A	4	4	436	0	0	95
31230	Pp3c8_6120V3.1	Pp3c8_6120	N/A	4	4	436	0	0	95
31231	Pp3c8_6120V3.4	Pp3c8_6120	N/A	4	4	458	0	0	117
31232	Pp3c8_6120V3.7	Pp3c8_6120	N/A	4	4	458	0	0	117
31233	Pp3c8_6120V3.3	Pp3c8_6120	N/A	4	4	458	0	0	117
31234	Pp3c8_6120V3.5	Pp3c8_6120	N/A	4	4	458	0	0	117
31235	Pp3c8_6120V3.6	Pp3c8_6120	N/A	4	4	458	0	0	117
31285	Pp3c9_5460V3.1	Pp3c9_5460	e1 component	4	6	440	0	0	93
31286	Pp3c9_5460V3.2	Pp3c9_5460	e1 component	4	6	440	0	0	93
31348	PAC:32954048.CDS.1	Pp3c5_15290	N/A	4	4	267	1	0	50
31410	Pp3c2_23590V3.6	Pp3c2_23590	oxygen-evolving enhancer protein chloroplast:wrky transcription	4	7	1202	0	1	623
31412	Pp3c2_23590V3.5	Pp3c2_23590	oxygen-evolving enhancer protein chloroplast:wrky transcription	4	5	918	0	1	623
31429	Pp3c12_14020V3.1	Pp3c12_14020	receptor-like kinase	4	5	829	0	0	429
31543	Pp3c9_5550V3.2	Pp3c9_5550	N/A	4	5	339	0	0	0
31544	Pp3c9_5550V3.1	Pp3c9_5550	N/A	4	5	497	0	0	150
31591	Pp3c10_5770V3.1	Pp3c10_5770	N/A	4	4	285	1	0	50
32876	Pp3c10_6900V3.3	Pp3c10_6900	kelch repeat-containing serine threonine phosphoesterase family expressed	4	5	1078	0	0	759
32877	Pp3c10_6900V3.1	Pp3c10_6900	kelch repeat-containing serine threonine phosphoesterase family expressed	4	5	1055	0	0	736
32878	Pp3c10_6900V3.2	Pp3c10_6900	kelch repeat-containing serine threonine phosphoesterase family expressed	4	5	1055	0	0	736
33056	Pp3c4_30330V3.1	Pp3c4_30330	rrna biogenesis protein rrp5:pre-rrna processing protein rrp5	4	5	2012	0	0	1322
33057	Pp3c4_30330V3.2	Pp3c4_30330	rrna biogenesis protein rrp5:pre-rrna processing protein rrp5	4	5	2012	0	0	1322
33227	Pp3c7_24690V3.1	Pp3c7_24690	integral membrane protein duf6	4	6	362	0	0	0
33228	Pp3c7_24690V3.2	Pp3c7_24690	integral membrane protein duf6	4	6	362	0	0	0
33384	Pp3c20_20430V3.1	Pp3c20_20430	leucine rich repeat-like protein	4	6	1076	0	0	210
33385	Pp3c20_20430V3.2	Pp3c20_20430	leucine rich repeat-like protein	4	6	1076	0	0	210
33855	Pp3c5_18040V3.2	Pp3c5_18040	protein kinase	4	6	766	0	1	388
33856	Pp3c5_18040V3.7	Pp3c5_18040	protein kinase	4	6	771	0	1	388
33857	Pp3c5_18040V3.5	Pp3c5_18040	protein kinase	4	6	771	0	1	388
33858	Pp3c5_18040V3.3	Pp3c5_18040	protein kinase	4	6	766	0	1	388
33859	Pp3c5_18040V3.4	Pp3c5_18040	protein kinase	4	6	766	0	1	388
33860	Pp3c5_18040V3.9	Pp3c5_18040	protein kinase	4	6	766	0	1	388
33861	Pp3c5_18040V3.8	Pp3c5_18040	protein kinase	4	6	771	0	1	388
33862	Pp3c5_18040V3.1	Pp3c5_18040	protein kinase	4	6	766	0	1	388
33863	Pp3c5_18040V3.6	Pp3c5_18040	protein kinase	4	6	771	0	1	388
33983	Pp3c3_19080V3.1	Pp3c3_19080	serine-threonine protein kinase, plant-type, putative	4	4	365	0	0	0
33984	Pp3c3_19080V3.2	Pp3c3_19080	serine-threonine protein kinase, plant-type, putative	4	4	365	0	0	0
33995	Pp3c9_4230V3.2	Pp3c9_4230	myosin	4	5	1438	0	1	255
33996	Pp3c9_4230V3.1	Pp3c9_4230	myosin	4	5	1438	0	1	255
33997	Pp3c9_4230V3.3	Pp3c9_4230	myosin	4	5	1438	0	1	255
34003	Pp3c22_23050V3.2	Pp3c22_23050	auxin influx carrier component	4	6	475	0	0	178
34004	Pp3c22_23050V3.1	Pp3c22_23050	auxin influx carrier component	4	6	475	0	0	178
34327	Pp3c6_3910V3.3	Pp3c6_3910	N/A	4	6	744	0	0	300
34328	Pp3c6_3910V3.1	Pp3c6_3910	N/A	4	6	744	0	0	300
34329	Pp3c6_3910V3.2	Pp3c6_3910	N/A	4	6	744	0	0	300
34411	Pp3c1_29660V3.1	Pp3c1_29660	MAA21.90; WD-40 repeat family protein [Arabidopsis thaliana]:MAA21.90; WD-40 repeat family protein	4	4	1166	0	1	274
34412	Pp3c1_29660V3.2	Pp3c1_29660	MAA21.90; WD-40 repeat family protein [Arabidopsis thaliana]:MAA21.90; WD-40 repeat family protein	4	4	1166	0	1	274
34532	Pp3c7_18310V3.1	Pp3c7_18310	N/A	4	6	469	0	1	81
34548	Pp3c2_18520V3.2	Pp3c2_18520	N/A	4	6	917	0	1	584
34549	Pp3c2_18520V3.1	Pp3c2_18520	N/A	4	6	918	0	1	585
34628	Pp3c6_25040V3.3	Pp3c6_25040	predicted protein	4	7	1564	0	0	1287
34629	Pp3c6_25040V3.5	Pp3c6_25040	predicted protein	4	7	1564	0	0	1287
34630	Pp3c6_25040V3.9	Pp3c6_25040	predicted protein	4	7	1564	0	0	1287
34632	Pp3c6_25040V3.6	Pp3c6_25040	predicted protein	4	7	1476	0	0	1199
34633	Pp3c6_25040V3.1	Pp3c6_25040	predicted protein	4	7	1564	0	0	1287
34634	Pp3c6_25040V3.2	Pp3c6_25040	predicted protein	4	7	1564	0	0	1287
34635	Pp3c6_25040V3.8	Pp3c6_25040	predicted protein	4	7	1322	0	0	1045
34636	Pp3c6_25040V3.4	Pp3c6_25040	predicted protein	4	7	1564	0	0	1287
34834	Pp3c12_24110V3.3	Pp3c12_24110	at5g52420 k24m7_17	4	4	292	0	0	22
34835	Pp3c12_24110V3.1	Pp3c12_24110	at5g52420 k24m7_17	4	4	376	0	0	22
34836	Pp3c12_24110V3.2	Pp3c12_24110	at5g52420 k24m7_17	4	4	292	0	0	22
35112	Pp3c12_18960V3.3	Pp3c12_18960	T17A5.2; protein kinase family protein	4	5	549	0	0	0
35113	Pp3c12_18960V3.2	Pp3c12_18960	T17A5.2; protein kinase family protein	4	5	690	0	0	92
35114	Pp3c12_18960V3.1	Pp3c12_18960	T17A5.2; protein kinase family protein	4	5	690	0	0	92
35115	Pp3c12_18960V3.4	Pp3c12_18960	T17A5.2; protein kinase family protein	4	5	690	0	0	92
35223	Pp3c12_9140V3.1	Pp3c12_9140	brassinosteroid insensitive 1-associated receptor kinase 1	4	5	709	0	0	377
35224	Pp3c12_9140V3.2	Pp3c12_9140	brassinosteroid insensitive 1-associated receptor kinase 1	4	5	671	0	0	339
35480	Pp3c7_8760V3.1	Pp3c7_8760	rna binding motif protein 35a	4	4	468	0	0	206
35595	Pp3c23_10200V3.1	Pp3c23_10200	auxin efflux carrier component	4	5	713	0	1	434
35596	Pp3c23_10200V3.2	Pp3c23_10200	auxin efflux carrier component	4	5	713	0	1	434
36034	Pp3c16_15980V3.2	Pp3c16_15980	phosphate transporter	4	6	540	0	0	20
36035	Pp3c16_15980V3.1	Pp3c16_15980	phosphate transporter	4	6	540	0	0	20
36567	Pp3c20_2460V3.1	Pp3c20_2460	phosphoribosyl pyrophosphate synthetase	4	4	424	0	0	3
36568	Pp3c20_2460V3.2	Pp3c20_2460	phosphoribosyl pyrophosphate synthetase	4	4	424	0	0	3
36723	Pp3c11_1440V3.1	Pp3c11_1440	atp binding	4	5	748	0	0	457
36724	Pp3c11_1440V3.2	Pp3c11_1440	atp binding	4	5	748	0	0	457
37240	Pp3c16_1460V3.3	Pp3c16_1460	arginine decarboxylase	4	7	771	0	1	119
37241	Pp3c16_1460V3.1	Pp3c16_1460	arginine decarboxylase	4	5	415	0	1	119
37242	Pp3c16_1460V3.4	Pp3c16_1460	arginine decarboxylase	4	7	771	0	1	119
37243	Pp3c16_1460V3.2	Pp3c16_1460	arginine decarboxylase	4	5	552	0	1	119
37432	Pp3c11_24660V3.1	Pp3c11_24660	rna binding motif protein 35a	4	4	468	0	0	206
37433	Pp3c11_24660V3.13	Pp3c11_24660	rna binding motif protein 35a	4	4	430	0	0	168
37435	Pp3c11_24660V3.3	Pp3c11_24660	rna binding motif protein 35a	4	4	468	0	0	206
37436	Pp3c11_24660V3.18	Pp3c11_24660	rna binding motif protein 35a	4	4	475	0	0	213
37437	Pp3c11_24660V3.19	Pp3c11_24660	rna binding motif protein 35a	4	4	401	0	0	139
37438	Pp3c11_24660V3.20	Pp3c11_24660	rna binding motif protein 35a	4	4	475	0	0	213
37439	Pp3c11_24660V3.6	Pp3c11_24660	rna binding motif protein 35a	4	4	475	0	0	213
37440	Pp3c11_24660V3.14	Pp3c11_24660	rna binding motif protein 35a	4	4	430	0	0	168
37441	Pp3c11_24660V3.16	Pp3c11_24660	rna binding motif protein 35a	4	4	401	0	0	139
37442	Pp3c11_24660V3.17	Pp3c11_24660	rna binding motif protein 35a	4	4	394	0	0	132
37443	Pp3c11_24660V3.11	Pp3c11_24660	rna binding motif protein 35a	4	4	423	0	0	161
37444	Pp3c11_24660V3.10	Pp3c11_24660	rna binding motif protein 35a	4	4	423	0	0	161
37445	Pp3c11_24660V3.7	Pp3c11_24660	rna binding motif protein 35a	4	4	475	0	0	213
37447	Pp3c11_24660V3.15	Pp3c11_24660	rna binding motif protein 35a	4	4	430	0	0	168
37448	Pp3c11_24660V3.4	Pp3c11_24660	rna binding motif protein 35a	4	4	468	0	0	206
37450	Pp3c11_24660V3.2	Pp3c11_24660	rna binding motif protein 35a	4	4	468	0	0	206
37451	Pp3c11_24660V3.12	Pp3c11_24660	rna binding motif protein 35a	4	4	423	0	0	161
37652	Pp3c6_13450V3.1	Pp3c6_13450	nucleobase ascorbate transporter	4	4	454	0	0	165
37738	Pp3c16_20290V3.5	Pp3c16_20290	rna binding	4	10	1403	0	0	443
37739	Pp3c16_20290V3.2	Pp3c16_20290	rna binding	4	10	1403	0	0	443
37740	Pp3c16_20290V3.6	Pp3c16_20290	rna binding	4	10	1403	0	0	443
37741	Pp3c16_20290V3.12	Pp3c16_20290	rna binding	4	10	1403	0	0	443
37742	Pp3c16_20290V3.11	Pp3c16_20290	rna binding	4	10	1370	0	0	443
37743	Pp3c16_20290V3.8	Pp3c16_20290	rna binding	4	10	1370	0	0	443
37744	Pp3c16_20290V3.9	Pp3c16_20290	rna binding	4	10	1370	0	0	443
37745	Pp3c16_20290V3.3	Pp3c16_20290	rna binding	4	10	1403	0	0	443
37746	Pp3c16_20290V3.7	Pp3c16_20290	rna binding	4	10	1370	0	0	443
37747	Pp3c16_20290V3.10	Pp3c16_20290	rna binding	4	10	1370	0	0	443
37748	Pp3c16_20290V3.4	Pp3c16_20290	rna binding	4	10	1403	0	0	443
37749	Pp3c16_20290V3.1	Pp3c16_20290	rna binding	4	10	1403	0	0	443
37760	Pp3c2_23960V3.3	Pp3c2_23960	receptor protein	4	7	833	0	0	382
37761	Pp3c2_23960V3.1	Pp3c2_23960	receptor protein	4	6	809	0	0	358
37762	Pp3c2_23960V3.2	Pp3c2_23960	receptor protein	4	7	637	0	0	186
37812	Pp3c4_28230V3.1	Pp3c4_28230	protein kinase	4	6	1276	0	1	866
37813	Pp3c4_28230V3.3	Pp3c4_28230	protein kinase	4	6	1276	0	1	866
37814	Pp3c4_28230V3.4	Pp3c4_28230	protein kinase	4	6	1276	0	1	866
37815	Pp3c4_28230V3.5	Pp3c4_28230	protein kinase	4	6	1263	0	1	853
37816	Pp3c4_28230V3.2	Pp3c4_28230	protein kinase	4	6	1276	0	1	866
37819	Pp3c22_14630V3.1	Pp3c22_14630	N/A	4	5	760	0	0	532
37853	Pp3c7_25580V3.1	Pp3c7_25580	phosphatase dcr2	4	5	397	0	0	0
37854	Pp3c7_25580V3.2	Pp3c7_25580	phosphatase dcr2	4	5	397	0	0	0
38053	Pp3c2_17720V3.3	Pp3c2_17720	contains ESTs D15165(C0191),C97954(C0191) similar to Arabidopsis thaliana chromosome5,At5g58560 unknown protein [Oryza sativa (japonica cultivar-group)]	4	4	303	0	0	0
38054	Pp3c2_17720V3.4	Pp3c2_17720	contains ESTs D15165(C0191),C97954(C0191) similar to Arabidopsis thaliana chromosome5,At5g58560 unknown protein [Oryza sativa (japonica cultivar-group)]	4	4	247	0	0	0
38055	Pp3c2_17720V3.1	Pp3c2_17720	contains ESTs D15165(C0191),C97954(C0191) similar to Arabidopsis thaliana chromosome5,At5g58560 unknown protein [Oryza sativa (japonica cultivar-group)]	4	5	426	0	0	0
38056	Pp3c2_17720V3.2	Pp3c2_17720	contains ESTs D15165(C0191),C97954(C0191) similar to Arabidopsis thaliana chromosome5,At5g58560 unknown protein [Oryza sativa (japonica cultivar-group)]	4	5	426	0	0	0
38293	Pp3c3_36660V3.3	Pp3c3_36660	N/A	4	8	908	0	0	468
38294	PAC:32940256.CDS.1	Pp3c3_36660	N/A	4	8	899	0	0	459
38295	PAC:32940255.CDS.1	Pp3c3_36660	N/A	4	8	899	0	0	459
38313	Pp3c13_15020V3.3	Pp3c13_15020	lmbr1 integral membrane family	4	6	495	0	0	122
38549	Pp3c4_17570V3.1	Pp3c4_17570	hnrnp-like protein	4	4	423	0	0	19
38550	Pp3c4_17570V3.4	Pp3c4_17570	hnrnp-like protein	4	4	423	0	0	19
38551	Pp3c4_17570V3.3	Pp3c4_17570	hnrnp-like protein	4	4	423	0	0	19
38552	Pp3c4_17570V3.2	Pp3c4_17570	hnrnp-like protein	4	4	423	0	0	19
38553	Pp3c4_17570V3.5	Pp3c4_17570	hnrnp-like protein	4	4	423	0	0	19
38554	Pp3c4_17570V3.8	Pp3c4_17570	hnrnp-like protein	4	4	423	0	0	19
38555	Pp3c4_17570V3.6	Pp3c4_17570	hnrnp-like protein	4	4	423	0	0	19
38556	Pp3c4_17570V3.7	Pp3c4_17570	hnrnp-like protein	4	4	423	0	0	19
38571	Pp3c26_8580V3.8	Pp3c26_8580	glycosyl hydrolase family 3 n terminal domain containing expressed	4	5	637	0	2	427
38572	Pp3c26_8580V3.1	Pp3c26_8580	glycosyl hydrolase family 3 n terminal domain containing expressed	4	5	637	0	2	427
38573	Pp3c26_8580V3.4	Pp3c26_8580	glycosyl hydrolase family 3 n terminal domain containing expressed	4	5	637	0	2	427
38574	Pp3c26_8580V3.7	Pp3c26_8580	glycosyl hydrolase family 3 n terminal domain containing expressed	4	5	637	0	2	427
38575	Pp3c26_8580V3.6	Pp3c26_8580	glycosyl hydrolase family 3 n terminal domain containing expressed	4	5	637	0	2	427
38576	Pp3c26_8580V3.9	Pp3c26_8580	glycosyl hydrolase family 3 n terminal domain containing expressed	4	5	637	0	2	427
38577	Pp3c26_8580V3.2	Pp3c26_8580	glycosyl hydrolase family 3 n terminal domain containing expressed	4	5	637	0	2	427
38578	Pp3c26_8580V3.5	Pp3c26_8580	glycosyl hydrolase family 3 n terminal domain containing expressed	4	5	637	0	2	427
38579	Pp3c26_8580V3.3	Pp3c26_8580	glycosyl hydrolase family 3 n terminal domain containing expressed	4	5	637	0	2	427
38867	Pp3c9_5860V3.2	Pp3c9_5860	calcium dependent protein kinase	4	5	549	0	0	51
38868	Pp3c9_5860V3.4	Pp3c9_5860	calcium dependent protein kinase	4	5	549	0	0	51
38869	Pp3c9_5860V3.1	Pp3c9_5860	calcium dependent protein kinase	4	5	549	0	0	51
38870	Pp3c9_5860V3.3	Pp3c9_5860	calcium dependent protein kinase	4	5	549	0	0	51
39136	Pp3c18_8560V3.2	Pp3c18_8560	trna pseudouridine synthase	4	4	764	0	0	225
39137	Pp3c18_8560V3.1	Pp3c18_8560	trna pseudouridine synthase	4	4	764	0	0	225
39301	PAC:32934364.CDS.1	Pp3c2_2960	N/A	4	5	629	0	0	427
39302	PAC:32934363.CDS.1	Pp3c2_2960	N/A	4	5	629	0	0	427
39423	Pp3c18_20160V3.9	Pp3c18_20160	gibberellin receptor	4	4	228	0	0	4
39425	Pp3c18_20160V3.13	Pp3c18_20160	gibberellin receptor	4	4	228	0	0	4
39428	Pp3c18_20160V3.12	Pp3c18_20160	gibberellin receptor	4	4	228	0	0	4
39430	Pp3c18_20160V3.11	Pp3c18_20160	gibberellin receptor	4	4	228	0	0	4
39432	Pp3c18_20160V3.10	Pp3c18_20160	gibberellin receptor	4	4	228	0	0	4
39488	Pp3c16_18760V3.2	Pp3c16_18760	phy3 gene for phytochrome protein PHY3	4	7	1122	0	0	596
39489	Pp3c16_18760V3.1	Pp3c16_18760	phy3 gene for phytochrome protein PHY3	4	7	1122	0	0	596
39490	Pp3c16_18760V3.4	Pp3c16_18760	phy3 gene for phytochrome protein PHY3	4	7	1122	0	0	596
39491	Pp3c16_18760V3.3	Pp3c16_18760	phy3 gene for phytochrome protein PHY3	4	7	1122	0	0	596
39503	Pp3c11_24730V3.2	Pp3c11_24730	N/A	4	4	832	0	1	575
39504	Pp3c11_24730V3.3	Pp3c11_24730	N/A	4	4	832	0	1	575
39505	Pp3c11_24730V3.1	Pp3c11_24730	N/A	4	4	832	0	1	575
39539	Pp3c26_10958V3.1	Pp3c26_10958	N/A	4	4	492	0	0	257
40020	Pp3c9_10760V3.3	Pp3c9_10760	MDK4.1; protein kinase family	4	8	873	0	0	512
40021	Pp3c9_10760V3.4	Pp3c9_10760	MDK4.1; protein kinase family	4	8	873	0	0	512
40023	Pp3c9_10760V3.2	Pp3c9_10760	MDK4.1; protein kinase family	4	8	873	0	0	512
40156	Pp3c26_10950V3.1	Pp3c26_10950	succinic semialdehyde dehydrogenase	4	4	492	0	0	257
40184	Pp3c5_23400V3.3	Pp3c5_23400	pectin methylesterase	4	4	436	0	1	185
40185	Pp3c5_23400V3.2	Pp3c5_23400	pectin methylesterase	4	4	412	0	1	161
40186	Pp3c5_23400V3.1	Pp3c5_23400	pectin methylesterase	4	4	406	0	1	155
40211	Pp3c17_11810V3.1	Pp3c17_11810	N/A	4	9	1279	0	1	789
40212	Pp3c17_11810V3.2	Pp3c17_11810	N/A	4	6	1149	0	0	698
40567	Pp3c24_4320V3.3	Pp3c24_4320	CG14796; CG14796 gene product from transcript CG14796-RA [Drosophila melanogaster]	4	5	757	0	1	80
40568	Pp3c24_4320V3.4	Pp3c24_4320	CG14796; CG14796 gene product from transcript CG14796-RA [Drosophila melanogaster]	4	4	564	0	0	80
40569	Pp3c24_4320V3.1	Pp3c24_4320	CG14796; CG14796 gene product from transcript CG14796-RA [Drosophila melanogaster]	4	5	757	0	1	80
40570	Pp3c24_4320V3.2	Pp3c24_4320	CG14796; CG14796 gene product from transcript CG14796-RA [Drosophila melanogaster]	4	5	758	0	1	80
41405	Pp3c2_33280V3.2	Pp3c2_33280	60s ribosomal protein	4	4	225	0	1	0
41620	Pp3c20_20770V3.1	Pp3c20_20770	nls-tir-nbs-lrr resistance protein	4	6	1276	0	1	142
41621	Pp3c20_20770V3.2	Pp3c20_20770	nls-tir-nbs-lrr resistance protein	4	4	424	0	0	0
41816	Pp3c1_31540V3.2	Pp3c1_31540	T24G5.120; glucose-1-phosphate adenylyltransferase, large subunit 1, chloroplast (ADP-glucose pyrophosphorylase) (ADG2) (APL1) [EC:2.7.7.27] [KO:K00975]	4	4	543	0	0	149
41817	Pp3c1_31540V3.1	Pp3c1_31540	T24G5.120; glucose-1-phosphate adenylyltransferase, large subunit 1, chloroplast (ADP-glucose pyrophosphorylase) (ADG2) (APL1) [EC:2.7.7.27] [KO:K00975]	4	4	543	0	0	149
41956	Pp3c2_9200V3.6	Pp3c2_9200	N/A	4	6	502	0	0	0
41957	Pp3c2_9200V3.3	Pp3c2_9200	N/A	4	6	503	0	0	0
41958	Pp3c2_9200V3.2	Pp3c2_9200	N/A	4	6	490	0	0	0
41959	Pp3c2_9200V3.7	Pp3c2_9200	N/A	4	5	393	0	0	0
41960	Pp3c2_9200V3.4	Pp3c2_9200	N/A	4	6	503	0	0	0
41961	Pp3c2_9200V3.1	Pp3c2_9200	N/A	4	6	490	0	0	0
41962	Pp3c2_9200V3.5	Pp3c2_9200	N/A	4	6	503	0	0	0
42003	PAC:32932029.CDS.1	Pp3c13_10710	xyloglucan galactosyltransferase	4	4	552	0	1	117
42004	PAC:32932030.CDS.1	Pp3c13_10710	xyloglucan galactosyltransferase	4	4	552	0	1	117
42163	Pp3c9_10730V3.2	Pp3c9_10730	N/A	4	5	872	0	0	511
42164	Pp3c9_10730V3.1	Pp3c9_10730	N/A	4	5	872	0	0	511
42347	Pp3c3_20840V3.1	Pp3c3_20840	atp binding	4	6	1312	0	0	652
42348	Pp3c3_20840V3.3	Pp3c3_20840	atp binding	4	6	1137	0	0	477
42349	Pp3c3_20840V3.4	Pp3c3_20840	atp binding	4	6	1313	0	0	653
42350	Pp3c3_20840V3.2	Pp3c3_20840	atp binding	4	6	1312	0	0	652
42416	Pp3c26_7940V3.3	Pp3c26_7940	cyclase dehydrase	4	4	258	0	0	0
42417	Pp3c26_7940V3.1	Pp3c26_7940	cyclase dehydrase	4	4	244	0	0	0
42418	Pp3c26_7940V3.2	Pp3c26_7940	cyclase dehydrase	4	4	244	0	0	0
42634	Pp3c6_16200V3.2	Pp3c6_16200	protein kinase	4	6	773	0	1	395
42635	Pp3c6_16200V3.1	Pp3c6_16200	protein kinase	4	6	773	0	1	395
42741	Pp3c20_18670V3.1	Pp3c20_18670	nitrite transporter	4	7	566	0	0	0
42742	Pp3c20_18670V3.2	Pp3c20_18670	nitrite transporter	4	7	566	0	0	0
42829	Pp3c4_17390V3.3	Pp3c4_17390	T22J18.17; tRNA-nucleotidyltransferase, putative / tRNA adenylyltransferase, putative [EC:2.7.7.25] [KO:K00974] [Arabidopsis thaliana]	4	4	623	0	0	107
42830	Pp3c4_17390V3.4	Pp3c4_17390	T22J18.17; tRNA-nucleotidyltransferase, putative / tRNA adenylyltransferase, putative [EC:2.7.7.25] [KO:K00974] [Arabidopsis thaliana]	4	4	545	0	0	107
42831	Pp3c4_17390V3.1	Pp3c4_17390	T22J18.17; tRNA-nucleotidyltransferase, putative / tRNA adenylyltransferase, putative [EC:2.7.7.25] [KO:K00974] [Arabidopsis thaliana]	4	4	623	0	0	107
42877	Pp3c1_11040V3.2	Pp3c1_11040	protein kinase domain containing expressed	4	7	909	0	1	591
42878	Pp3c1_11040V3.1	Pp3c1_11040	protein kinase domain containing expressed	4	7	909	0	1	591
42891	Pp3c7_2900V3.4	Pp3c7_2900	dna binding	4	7	1420	0	0	1093
42892	Pp3c7_2900V3.3	Pp3c7_2900	dna binding	4	8	1593	0	0	1266
42893	PAC:32924252.CDS.1	Pp3c7_2900	dna binding	4	7	1491	0	0	1164
42894	Pp3c7_2900V3.2	Pp3c7_2900	dna binding	4	8	1664	0	0	1337
42895	Pp3c7_2900V3.1	Pp3c7_2900	dna binding	4	8	1664	0	0	1337
43244	PAC:32910311.CDS.1	Pp3c24_13090	chalcone synthase	4	5	322	0	0	105
43245	PAC:32910312.CDS.1	Pp3c24_13090	chalcone synthase	4	5	322	0	0	105
43268	Pp3c13_8430V3.3	Pp3c13_8430	glycosyl transferase	4	5	422	0	0	0
43269	Pp3c13_8430V3.1	Pp3c13_8430	glycosyl transferase	4	5	422	0	0	0
43270	Pp3c13_8430V3.2	Pp3c13_8430	glycosyl transferase	4	5	422	0	0	0
43325	Pp3c12_13600V3.2	Pp3c12_13600	MYC6.9; hypothetical protein [Arabidopsis thaliana]	4	7	533	0	0	0
43326	Pp3c12_13600V3.1	Pp3c12_13600	MYC6.9; hypothetical protein [Arabidopsis thaliana]	4	7	533	0	0	0
43327	Pp3c12_13600V3.3	Pp3c12_13600	MYC6.9; hypothetical protein [Arabidopsis thaliana]	4	7	533	0	0	0
43328	Pp3c12_13600V3.4	Pp3c12_13600	MYC6.9; hypothetical protein [Arabidopsis thaliana]	4	7	533	0	0	0
43559	PAC:32907166.CDS.1	Pp3c17_21540	N/A	4	6	1307	0	0	993
43560	PAC:32907165.CDS.1	Pp3c17_21540	N/A	4	7	1366	0	1	1052
43561	PAC:32907164.CDS.1	Pp3c17_21540	N/A	4	7	1366	0	1	1052
43757	Pp3c22_21460V3.1	Pp3c22_21460	chaperone protein	4	4	566	0	0	122
43758	Pp3c22_21460V3.2	Pp3c22_21460	chaperone protein	4	4	566	0	0	122
44292	PAC:32970933.CDS.1	Pp3c1_40060	dead box atp-dependent rna	4	5	745	0	0	499
44293	PAC:32970932.CDS.1	Pp3c1_40060	dead box atp-dependent rna	4	5	745	0	0	499
44912	Pp3c16_830V3.1	Pp3c16_830	nucleobase ascorbate transporter	4	7	534	0	0	188
44913	Pp3c16_830V3.2	Pp3c16_830	nucleobase ascorbate transporter	4	7	534	0	0	188
44955	Pp3c11_19850V3.3	Pp3c11_19850	cation proton exchanger	4	6	844	0	1	140
44956	Pp3c11_19850V3.1	Pp3c11_19850	cation proton exchanger	4	6	844	0	1	140
44957	Pp3c11_19850V3.2	Pp3c11_19850	cation proton exchanger	4	6	844	0	1	140
44999	PAC:32933198.CDS.1	Pp3c2_2840	dead box atp-dependent rna	4	5	743	0	0	497
45000	PAC:32933199.CDS.1	Pp3c2_2840	dead box atp-dependent rna	4	5	743	0	0	497
45526	Pp3c21_10030V3.2	Pp3c21_10030	ammonium transporter	4	6	505	0	1	66
45527	Pp3c21_10030V3.1	Pp3c21_10030	ammonium transporter	4	6	505	0	1	66
46093	Pp3c24_8130V3.1	Pp3c24_8130	N/A	4	4	218	0	0	0
46110	Pp3c17_21070V3.12	Pp3c17_21070	hypothetical protein [Dictyostelium discoideum]:F14D16.32; DNA cross-link repair protein-related [Arabidopsis thaliana]	4	5	341	0	0	0
46111	Pp3c17_21070V3.19	Pp3c17_21070	hypothetical protein [Dictyostelium discoideum]:F14D16.32; DNA cross-link repair protein-related [Arabidopsis thaliana]	4	5	588	0	1	94
46112	Pp3c17_21070V3.4	Pp3c17_21070	hypothetical protein [Dictyostelium discoideum]:F14D16.32; DNA cross-link repair protein-related [Arabidopsis thaliana]	4	5	441	0	0	95
46113	Pp3c17_21070V3.15	Pp3c17_21070	hypothetical protein [Dictyostelium discoideum]:F14D16.32; DNA cross-link repair protein-related [Arabidopsis thaliana]	4	5	488	0	1	0
46114	Pp3c17_21070V3.8	Pp3c17_21070	hypothetical protein [Dictyostelium discoideum]:F14D16.32; DNA cross-link repair protein-related [Arabidopsis thaliana]	4	5	589	0	0	95
46115	Pp3c17_21070V3.14	Pp3c17_21070	hypothetical protein [Dictyostelium discoideum]:F14D16.32; DNA cross-link repair protein-related [Arabidopsis thaliana]	4	5	488	0	1	0
46116	Pp3c17_21070V3.9	Pp3c17_21070	hypothetical protein [Dictyostelium discoideum]:F14D16.32; DNA cross-link repair protein-related [Arabidopsis thaliana]	4	5	589	0	0	95
46117	Pp3c17_21070V3.7	Pp3c17_21070	hypothetical protein [Dictyostelium discoideum]:F14D16.32; DNA cross-link repair protein-related [Arabidopsis thaliana]	4	5	589	0	0	95
46118	Pp3c17_21070V3.2	Pp3c17_21070	hypothetical protein [Dictyostelium discoideum]:F14D16.32; DNA cross-link repair protein-related [Arabidopsis thaliana]	4	5	440	0	1	94
46119	Pp3c17_21070V3.13	Pp3c17_21070	hypothetical protein [Dictyostelium discoideum]:F14D16.32; DNA cross-link repair protein-related [Arabidopsis thaliana]	4	5	341	0	0	0
46120	Pp3c17_21070V3.3	Pp3c17_21070	hypothetical protein [Dictyostelium discoideum]:F14D16.32; DNA cross-link repair protein-related [Arabidopsis thaliana]	4	5	441	0	0	95
46121	Pp3c17_21070V3.5	Pp3c17_21070	hypothetical protein [Dictyostelium discoideum]:F14D16.32; DNA cross-link repair protein-related [Arabidopsis thaliana]	4	5	588	0	1	94
46122	Pp3c17_21070V3.18	Pp3c17_21070	hypothetical protein [Dictyostelium discoideum]:F14D16.32; DNA cross-link repair protein-related [Arabidopsis thaliana]	4	5	488	0	1	0
46123	Pp3c17_21070V3.10	Pp3c17_21070	hypothetical protein [Dictyostelium discoideum]:F14D16.32; DNA cross-link repair protein-related [Arabidopsis thaliana]	4	5	340	0	1	0
46124	Pp3c17_21070V3.1	Pp3c17_21070	hypothetical protein [Dictyostelium discoideum]:F14D16.32; DNA cross-link repair protein-related [Arabidopsis thaliana]	4	5	440	0	1	94
46125	Pp3c17_21070V3.11	Pp3c17_21070	hypothetical protein [Dictyostelium discoideum]:F14D16.32; DNA cross-link repair protein-related [Arabidopsis thaliana]	4	5	340	0	1	0
46126	Pp3c17_21070V3.16	Pp3c17_21070	hypothetical protein [Dictyostelium discoideum]:F14D16.32; DNA cross-link repair protein-related [Arabidopsis thaliana]	4	5	489	0	0	0
46127	Pp3c17_21070V3.6	Pp3c17_21070	hypothetical protein [Dictyostelium discoideum]:F14D16.32; DNA cross-link repair protein-related [Arabidopsis thaliana]	4	5	588	0	1	94
46128	Pp3c17_21070V3.17	Pp3c17_21070	hypothetical protein [Dictyostelium discoideum]:F14D16.32; DNA cross-link repair protein-related [Arabidopsis thaliana]	4	5	489	0	0	0
46195	Pp3c11_22410V3.2	Pp3c11_22410	glutathione-regulated potassium-efflux system protein	4	7	1374	0	1	1017
46196	Pp3c11_22410V3.4	Pp3c11_22410	glutathione-regulated potassium-efflux system protein	4	7	1381	0	1	1024
46197	Pp3c11_22410V3.1	Pp3c11_22410	glutathione-regulated potassium-efflux system protein	4	7	1381	0	1	1024
46198	Pp3c11_22410V3.3	Pp3c11_22410	glutathione-regulated potassium-efflux system protein	4	7	1381	0	1	1024
46339	Pp3c18_11000V3.4	Pp3c18_11000	F13O11.19; integral membrane transporter family protein	4	4	461	0	0	98
46340	Pp3c18_11000V3.6	Pp3c18_11000	F13O11.19; integral membrane transporter family protein	4	4	461	0	0	98
46341	Pp3c18_11000V3.5	Pp3c18_11000	F13O11.19; integral membrane transporter family protein	4	4	461	0	0	98
46342	Pp3c18_11000V3.7	Pp3c18_11000	F13O11.19; integral membrane transporter family protein	4	4	461	0	0	98
46343	Pp3c18_11000V3.3	Pp3c18_11000	F13O11.19; integral membrane transporter family protein	4	4	461	0	0	98
46344	Pp3c18_11000V3.1	Pp3c18_11000	F13O11.19; integral membrane transporter family protein	4	4	461	0	0	98
46345	Pp3c18_11000V3.2	Pp3c18_11000	F13O11.19; integral membrane transporter family protein	4	4	461	0	0	98
46388	Pp3c20_10750V3.2	Pp3c20_10750	af411796_1at3g62580 t12c14_280	4	4	214	0	1	0
46389	Pp3c20_10750V3.1	Pp3c20_10750	af411796_1at3g62580 t12c14_280	4	4	214	0	1	0
46441	Pp3c15_19060V3.1	Pp3c15_19060	pectate lyase	4	5	487	0	0	170
46442	Pp3c15_19060V3.5	Pp3c15_19060	pectate lyase	4	5	424	0	0	107
46443	Pp3c15_19060V3.2	Pp3c15_19060	pectate lyase	4	4	321	0	0	4
46444	Pp3c15_19060V3.3	Pp3c15_19060	pectate lyase	4	5	424	0	0	107
46445	Pp3c15_19060V3.9	Pp3c15_19060	pectate lyase	4	5	487	0	0	170
46446	Pp3c15_19060V3.8	Pp3c15_19060	pectate lyase	4	5	487	0	0	170
46447	Pp3c15_19060V3.6	Pp3c15_19060	pectate lyase	4	5	424	0	0	107
46448	Pp3c15_19060V3.4	Pp3c15_19060	pectate lyase	4	5	424	0	0	107
46449	Pp3c15_19060V3.7	Pp3c15_19060	pectate lyase	4	5	424	0	0	107
47164	Pp3c16_25600V3.2	Pp3c16_25600	sodium phosphate symporter	4	6	654	0	2	0
47165	Pp3c16_25600V3.1	Pp3c16_25600	sodium phosphate symporter	4	6	654	0	2	0
47301	Pp3c20_15730V3.6	Pp3c20_15730	K14A17.3; peroxidase, putative [EC:1.11.1.7] [KO:K00430] [Arabidopsis thaliana]	4	4	319	0	0	0
47302	Pp3c20_15730V3.2	Pp3c20_15730	K14A17.3; peroxidase, putative [EC:1.11.1.7] [KO:K00430] [Arabidopsis thaliana]	4	4	319	0	0	0
47378	Pp3c17_8610V3.1	Pp3c17_8610	N/A	4	4	450	0	0	167
47528	Pp3c10_4410V3.1	Pp3c10_4410	T2G17.8; expressed protein [Arabidopsis thaliana]	4	4	243	0	0	0
47532	Pp3c10_4410V3.2	Pp3c10_4410	T2G17.8; expressed protein [Arabidopsis thaliana]	4	4	243	0	0	0
47570	Pp3c16_16440V3.5	Pp3c16_16440	brassinosteroid insensitive 1-associated receptor kinase 1	4	7	660	0	0	114
47571	Pp3c16_16440V3.6	Pp3c16_16440	brassinosteroid insensitive 1-associated receptor kinase 1	4	7	660	0	0	114
47572	Pp3c16_16440V3.2	Pp3c16_16440	brassinosteroid insensitive 1-associated receptor kinase 1	4	7	660	0	0	114
47573	Pp3c16_16440V3.7	Pp3c16_16440	brassinosteroid insensitive 1-associated receptor kinase 1	4	7	537	0	0	114
47574	Pp3c16_16440V3.3	Pp3c16_16440	brassinosteroid insensitive 1-associated receptor kinase 1	4	7	660	0	0	114
47575	Pp3c16_16440V3.4	Pp3c16_16440	brassinosteroid insensitive 1-associated receptor kinase 1	4	7	660	0	0	114
47576	Pp3c16_16440V3.1	Pp3c16_16440	brassinosteroid insensitive 1-associated receptor kinase 1	4	7	655	0	0	114
47577	Pp3c16_16440V3.8	Pp3c16_16440	brassinosteroid insensitive 1-associated receptor kinase 1	4	7	660	0	0	114
48221	Pp3c14_22160V3.1	Pp3c14_22160	arsenical pump-driving	4	4	365	0	0	0
48222	Pp3c14_22160V3.2	Pp3c14_22160	arsenical pump-driving	4	4	365	0	0	0
48274	Pp3c5_3970V3.2	Pp3c5_3970	MCD7.1; pumilio-family RNA-binding protein, putative [Arabidopsis thaliana]	4	5	956	0	0	37
48275	Pp3c5_3970V3.1	Pp3c5_3970	MCD7.1; pumilio-family RNA-binding protein, putative [Arabidopsis thaliana]	4	5	956	0	0	37
48350	Pp3c5_5900V3.5	Pp3c5_5900	karyogamy protein	4	7	1954	1	0	1276
48351	Pp3c5_5900V3.3	Pp3c5_5900	karyogamy protein	4	7	1962	1	0	1284
48352	Pp3c5_5900V3.1	Pp3c5_5900	karyogamy protein	4	7	1962	1	0	1284
48353	Pp3c5_5900V3.2	Pp3c5_5900	karyogamy protein	4	7	1962	1	0	1284
48354	Pp3c5_5900V3.4	Pp3c5_5900	karyogamy protein	4	7	1954	1	0	1276
48555	Pp3c23_9660V3.5	Pp3c23_9660	T16B12.3; expressed protein [Arabidopsis thaliana]:g1l1 gene for putative G1-like protein G1L1	4	4	390	0	0	117
48556	PAC:32950604.CDS.1	Pp3c23_9660	T16B12.3; expressed protein [Arabidopsis thaliana]:g1l1 gene for putative G1-like protein G1L1	4	4	292	0	0	19
48557	PAC:32950601.CDS.1	Pp3c23_9660	T16B12.3; expressed protein [Arabidopsis thaliana]:g1l1 gene for putative G1-like protein G1L1	4	4	292	0	0	19
48558	PAC:32950602.CDS.1	Pp3c23_9660	T16B12.3; expressed protein [Arabidopsis thaliana]:g1l1 gene for putative G1-like protein G1L1	4	4	292	0	0	19
48559	PAC:32950603.CDS.1	Pp3c23_9660	T16B12.3; expressed protein [Arabidopsis thaliana]:g1l1 gene for putative G1-like protein G1L1	4	4	292	0	0	19
48624	Pp3c11_8790V3.1	Pp3c11_8790	N/A	4	8	2316	0	1	110
48639	Pp3c7_15290V3.2	Pp3c7_15290	zinc-finger-ran binding domain-containing protein	4	4	211	0	0	0
48700	Pp3c6_26980V3.2	Pp3c6_26980	karyogamy protein	4	7	1309	0	0	749
48701	Pp3c6_26980V3.1	Pp3c6_26980	karyogamy protein	4	7	1309	0	0	749
48702	Pp3c6_26980V3.3	Pp3c6_26980	karyogamy protein	4	7	1309	0	0	749
48871	Pp3c16_14760V3.1	Pp3c16_14760	N/A	4	4	367	0	0	75
48907	PAC:32909711.CDS.1	Pp3c24_8490	N/A	4	4	289	0	0	22
48908	PAC:32909710.CDS.1	Pp3c24_8490	N/A	4	4	289	0	0	22
48909	PAC:32909708.CDS.1	Pp3c24_8490	N/A	4	4	289	0	0	22
48910	PAC:32909709.CDS.1	Pp3c24_8490	N/A	4	4	289	0	0	22
49396	Pp3c10_21640V3.2	Pp3c10_21640	nodulin-like protein	4	5	599	0	0	363
49397	Pp3c10_21640V3.3	Pp3c10_21640	nodulin-like protein	4	4	490	0	0	254
49398	Pp3c10_21640V3.1	Pp3c10_21640	nodulin-like protein	4	5	599	0	0	363
49666	Pp3c17_17550V3.2	Pp3c17_17550	dek1 (defective kernel 1) calcium-dependent cysteine-type endopeptidase cysteine-type endopeptidase	4	12	2172	0	2	168
49667	Pp3c17_17550V3.5	Pp3c17_17550	dek1 (defective kernel 1) calcium-dependent cysteine-type endopeptidase cysteine-type endopeptidase	4	12	2172	0	2	168
49668	Pp3c17_17550V3.6	Pp3c17_17550	dek1 (defective kernel 1) calcium-dependent cysteine-type endopeptidase cysteine-type endopeptidase	4	12	2172	0	2	168
49669	Pp3c17_17550V3.1	Pp3c17_17550	dek1 (defective kernel 1) calcium-dependent cysteine-type endopeptidase cysteine-type endopeptidase	4	12	2172	0	2	168
49670	Pp3c17_17550V3.4	Pp3c17_17550	dek1 (defective kernel 1) calcium-dependent cysteine-type endopeptidase cysteine-type endopeptidase	4	12	2172	0	2	168
49671	Pp3c17_17550V3.3	Pp3c17_17550	dek1 (defective kernel 1) calcium-dependent cysteine-type endopeptidase cysteine-type endopeptidase	4	12	2172	0	2	168
50046	Pp3c12_10960V3.2	Pp3c12_10960	nuclear acid binding	4	4	457	0	0	81
50047	Pp3c12_10960V3.1	Pp3c12_10960	nuclear acid binding	4	4	457	0	0	81
50272	Pp3c1_16500V3.2	Pp3c1_16500	conserved hypothetical protein	4	5	548	0	1	86
50273	Pp3c1_16500V3.1	Pp3c1_16500	conserved hypothetical protein	4	5	548	0	1	86
50275	Pp3c1_16500V3.3	Pp3c1_16500	conserved hypothetical protein	4	5	548	0	1	86
50371	Pp3c9_20170V3.2	Pp3c9_20170	amino acid permease	4	5	550	1	0	305
50372	Pp3c9_20170V3.1	Pp3c9_20170	amino acid permease	4	5	550	1	0	305
50373	PAC:32904266.CDS.1	Pp3c22_7870	F25I16.6; rhomboid family protein	4	4	312	0	0	71
50374	PAC:32904267.CDS.1	Pp3c22_7870	F25I16.6; rhomboid family protein	4	4	312	0	0	71
50620	Pp3c26_12270V3.2	Pp3c26_12270	nucleic acid binding	4	5	407	0	0	99
50621	Pp3c26_12270V3.1	Pp3c26_12270	nucleic acid binding	4	5	407	0	0	99
50627	PAC:32964867.CDS.1	Pp3c8_1820	N/A	4	4	305	0	0	30
50628	Pp3c8_1820V3.5	Pp3c8_1820	N/A	4	5	295	0	0	0
50629	PAC:32964866.CDS.1	Pp3c8_1820	N/A	4	4	305	0	0	30
50630	Pp3c8_1820V3.4	Pp3c8_1820	N/A	4	5	351	0	0	0
50631	Pp3c8_1820V3.3	Pp3c8_1820	N/A	4	4	249	0	0	30
50632	Pp3c8_1820V3.2	Pp3c8_1820	N/A	4	4	249	0	0	30
50759	Pp3c4_25090V3.1	Pp3c4_25090	phosphoenolpyruvate carboxykinase	4	5	666	0	0	325
50760	Pp3c4_25090V3.2	Pp3c4_25090	phosphoenolpyruvate carboxykinase	4	5	666	0	0	325
51000	Pp3c24_6510V3.1	Pp3c24_6510	glutamate carboxypeptidase	4	4	779	0	0	383
51177	PAC:32935810.CDS.1	Pp3c2_32320	chalcone synthase	4	5	397	0	0	180
51178	PAC:32935811.CDS.1	Pp3c2_32320	chalcone synthase	4	5	397	0	0	180
51476	Pp3c13_15460V3.5	Pp3c13_15460	N/A	4	6	745	0	0	496
51477	Pp3c13_15460V3.4	Pp3c13_15460	N/A	4	6	745	0	0	496
51478	Pp3c13_15460V3.2	Pp3c13_15460	N/A	4	6	745	0	0	496
51479	Pp3c13_15460V3.1	Pp3c13_15460	N/A	4	6	745	0	0	496
51480	Pp3c13_15460V3.6	Pp3c13_15460	N/A	4	6	745	0	0	496
51481	Pp3c13_15460V3.3	Pp3c13_15460	N/A	4	6	745	0	0	496
51573	Pp3c19_13790V3.1	Pp3c19_13790	chalcone synthase	4	4	357	0	1	140
52690	Pp3c20_19020V3.1	Pp3c20_19020	threonyl-trna synthetase	4	5	685	0	0	297
52691	Pp3c20_19020V3.2	Pp3c20_19020	threonyl-trna synthetase	4	5	685	0	0	297
52764	Pp3c20_21990V3.3	Pp3c20_21990	N/A	4	4	219	0	0	0
52765	Pp3c20_21990V3.1	Pp3c20_21990	N/A	4	4	219	0	0	0
52766	Pp3c20_21990V3.2	Pp3c20_21990	N/A	4	4	219	0	0	0
53065	Pp3c3_26430V3.2	Pp3c3_26430	N/A	4	4	841	0	0	163
53656	Pp3c11_8540V3.1	Pp3c11_8540	kynurenine 3-monooxygenase	4	5	565	0	1	355
53657	Pp3c11_8540V3.3	Pp3c11_8540	kynurenine 3-monooxygenase	4	5	564	0	1	354
53658	Pp3c11_8540V3.2	Pp3c11_8540	kynurenine 3-monooxygenase	4	5	564	0	1	354
53659	Pp3c11_8540V3.4	Pp3c11_8540	kynurenine 3-monooxygenase	4	5	564	0	1	354
53704	Pp3c17_2130V3.2	Pp3c17_2130	:F25A4.18; pentatricopeptide (PPR) repeat-containing protein [Arabidopsis thaliana]	4	6	1222	0	1	563
53705	Pp3c17_2130V3.1	Pp3c17_2130	:F25A4.18; pentatricopeptide (PPR) repeat-containing protein [Arabidopsis thaliana]	4	6	1222	0	1	563
53935	Pp3c3_36680V3.1	Pp3c3_36680	somatic embryogenesis receptor kinase	4	4	629	0	1	295
53936	Pp3c3_36680V3.2	Pp3c3_36680	somatic embryogenesis receptor kinase	4	4	629	0	1	295
54021	Pp3c8_25270V3.2	Pp3c8_25270	T9J23.16; serine/threonine protein kinase (RFK3)	4	5	623	0	0	411
54022	Pp3c8_25270V3.1	Pp3c8_25270	T9J23.16; serine/threonine protein kinase (RFK3)	4	5	653	0	0	441
54349	Pp3c5_19590V3.1	Pp3c5_19590	aldehyde dehydrogenase	4	4	553	0	0	326
54350	Pp3c5_19590V3.3	Pp3c5_19590	aldehyde dehydrogenase	4	4	553	0	0	326
54351	Pp3c5_19590V3.2	Pp3c5_19590	aldehyde dehydrogenase	4	4	553	0	0	326
54352	Pp3c5_19590V3.4	Pp3c5_19590	aldehyde dehydrogenase	4	4	553	0	0	326
54393	PAC:32925012.CDS.1	Pp3c7_4010	mitogen-activated protein kinase kinase	4	4	759	0	0	425
54394	PAC:32925011.CDS.1	Pp3c7_4010	mitogen-activated protein kinase kinase	4	4	759	0	0	425
54436	Pp3c24_11156V3.1	Pp3c24_11156	N/A	4	5	538	0	0	8
54440	Pp3c22_21970V3.1	Pp3c22_21970	nrt2_2 gene for high affinity nitrate transporter protein NRT2_2	4	4	547	0	0	210
54441	Pp3c22_21970V3.2	Pp3c22_21970	nrt2_2 gene for high affinity nitrate transporter protein NRT2_2	4	4	547	0	0	210
54523	Pp3c12_21500V3.2	Pp3c12_21500	N/A	4	9	2612	0	0	0
54525	Pp3c12_21500V3.5	Pp3c12_21500	N/A	4	9	2546	0	0	0
54527	Pp3c12_21500V3.1	Pp3c12_21500	N/A	4	9	2666	0	0	0
54528	Pp3c12_21500V3.4	Pp3c12_21500	N/A	4	9	2547	0	0	0
54575	Pp3c8_22130V3.1	Pp3c8_22130	N/A	4	15	5619	0	0	1615
54576	Pp3c8_22130V3.2	Pp3c8_22130	N/A	4	15	5619	0	0	1615
54651	Pp3c19_16800V3.2	Pp3c19_16800	sulfate transporter	4	6	491	0	0	236
54652	Pp3c19_16800V3.3	Pp3c19_16800	sulfate transporter	4	6	491	0	0	236
54653	Pp3c19_16800V3.1	Pp3c19_16800	sulfate transporter	4	6	491	0	0	236
54798	Pp3c21_20860V3.2	Pp3c21_20860	nucleobase ascorbate transporter	4	4	536	0	0	210
54799	Pp3c21_20860V3.1	Pp3c21_20860	nucleobase ascorbate transporter	4	4	536	0	0	210
54800	Pp3c21_20860V3.3	Pp3c21_20860	nucleobase ascorbate transporter	4	4	397	0	0	71
54895	Pp3c16_18360V3.3	Pp3c16_18360	protein phosphatase	4	8	1194	0	0	49
54896	Pp3c16_18360V3.5	Pp3c16_18360	protein phosphatase	4	8	1194	0	0	49
54897	Pp3c16_18360V3.1	Pp3c16_18360	protein phosphatase	4	8	1194	0	0	49
54898	Pp3c16_18360V3.4	Pp3c16_18360	protein phosphatase	4	8	1194	0	0	49
54899	Pp3c16_18360V3.2	Pp3c16_18360	protein phosphatase	4	8	1194	0	0	49
54933	Pp3c26_2830V3.1	Pp3c26_2830	Hypothetical PE-PGRS family protein PE_PGRS54 precursor [Mycobacterium tuberculosis]	4	8	1821	0	0	277
54934	Pp3c26_2830V3.5	Pp3c26_2830	Hypothetical PE-PGRS family protein PE_PGRS54 precursor [Mycobacterium tuberculosis]	4	8	1821	0	0	277
54935	Pp3c26_2830V3.4	Pp3c26_2830	Hypothetical PE-PGRS family protein PE_PGRS54 precursor [Mycobacterium tuberculosis]	4	8	1817	0	0	277
54936	Pp3c26_2830V3.2	Pp3c26_2830	Hypothetical PE-PGRS family protein PE_PGRS54 precursor [Mycobacterium tuberculosis]	4	8	1821	0	0	277
54937	Pp3c26_2830V3.3	Pp3c26_2830	Hypothetical PE-PGRS family protein PE_PGRS54 precursor [Mycobacterium tuberculosis]	4	8	1821	0	0	277
55045	Pp3c3_18590V3.2	Pp3c3_18590	flavine-containing monoxygenase	4	5	434	0	0	58
55046	Pp3c3_18590V3.1	Pp3c3_18590	flavine-containing monoxygenase	4	5	434	0	0	58
55068	Pp3c25_7050V3.13	Pp3c25_7050	protein phosphatase	4	8	1189	0	0	47
55069	Pp3c25_7050V3.7	Pp3c25_7050	protein phosphatase	4	6	1107	0	0	47
55074	Pp3c25_7050V3.8	Pp3c25_7050	protein phosphatase	4	8	1189	0	0	47
55075	Pp3c25_7050V3.9	Pp3c25_7050	protein phosphatase	4	6	1107	0	0	47
55076	Pp3c25_7050V3.4	Pp3c25_7050	protein phosphatase	4	8	1189	0	0	47
55097	Pp3c17_6060V3.1	Pp3c17_6060	protein kinase	4	5	560	0	0	97
55098	Pp3c17_6060V3.2	Pp3c17_6060	protein kinase	4	5	560	0	0	97
55199	Pp3c12_22530V3.2	Pp3c12_22530	aquaporin	4	4	280	0	0	74
55200	Pp3c12_22530V3.1	Pp3c12_22530	aquaporin	4	4	280	0	0	74
55344	Pp3c4_28370V3.2	Pp3c4_28370	light-harvesting complex ii protein lhcb5	4	4	299	0	0	82
55345	Pp3c4_28370V3.1	Pp3c4_28370	light-harvesting complex ii protein lhcb5	4	4	299	0	0	82
55402	Pp3c3_22160V3.2	Pp3c3_22160	protein phosphatase	4	4	294	1	0	12
55403	Pp3c3_22160V3.3	Pp3c3_22160	protein phosphatase	4	4	294	1	0	12
55495	Pp3c3_4970V3.1	Pp3c3_4970	signal peptide peptidase-like protein	4	5	501	0	0	268
55496	Pp3c3_4970V3.2	Pp3c3_4970	signal peptide peptidase-like protein	4	5	501	0	0	268
55535	Pp3c1_31160V3.1	Pp3c1_31160	subfamily member 13	4	10	2949	0	0	2188
55536	Pp3c1_31160V3.3	Pp3c1_31160	subfamily member 13	4	10	2949	0	0	2188
55537	Pp3c1_31160V3.2	Pp3c1_31160	subfamily member 13	4	10	2949	0	0	2188
56400	Pp3c11_6640V3.2	Pp3c11_6640	N/A	4	8	1222	0	1	867
56401	Pp3c11_6640V3.1	Pp3c11_6640	N/A	4	8	1226	0	1	871
56402	Pp3c11_6640V3.4	Pp3c11_6640	N/A	4	8	1226	0	1	871
56403	Pp3c11_6640V3.5	Pp3c11_6640	N/A	4	8	1226	0	1	871
56404	Pp3c11_6640V3.3	Pp3c11_6640	N/A	4	8	1222	0	1	867
56670	Pp3c6_5860V3.3	Pp3c6_5860	F28M20.140; ubiquitin carboxyl-terminal hydrolase family protein / zinc finger (MYND type) family protein	4	5	1204	0	0	277
56671	Pp3c6_5860V3.1	Pp3c6_5860	F28M20.140; ubiquitin carboxyl-terminal hydrolase family protein / zinc finger (MYND type) family protein	4	5	957	0	0	277
56672	Pp3c6_5860V3.2	Pp3c6_5860	F28M20.140; ubiquitin carboxyl-terminal hydrolase family protein / zinc finger (MYND type) family protein	4	5	1204	0	0	277
56688	Pp3c26_1280V3.1	Pp3c26_1280	pleckstrin homology domain family m (with run domain) member 1	4	6	971	0	0	512
56689	Pp3c26_1280V3.5	Pp3c26_1280	pleckstrin homology domain family m (with run domain) member 1	4	6	971	0	0	512
56690	Pp3c26_1280V3.6	Pp3c26_1280	pleckstrin homology domain family m (with run domain) member 1	4	6	971	0	0	512
56691	Pp3c26_1280V3.2	Pp3c26_1280	pleckstrin homology domain family m (with run domain) member 1	4	6	971	0	0	512
56692	Pp3c26_1280V3.3	Pp3c26_1280	pleckstrin homology domain family m (with run domain) member 1	4	6	971	0	0	512
56693	Pp3c26_1280V3.4	Pp3c26_1280	pleckstrin homology domain family m (with run domain) member 1	4	6	971	0	0	512
56794	Pp3c1_21290V3.2	Pp3c1_21290	N/A	4	4	434	1	0	0
56795	Pp3c1_21290V3.6	Pp3c1_21290	N/A	4	4	434	1	0	0
56796	Pp3c1_21290V3.5	Pp3c1_21290	N/A	4	4	434	1	0	0
56797	Pp3c1_21290V3.4	Pp3c1_21290	N/A	4	4	434	1	0	0
56799	Pp3c1_21290V3.3	Pp3c1_21290	N/A	4	4	434	1	0	0
56800	Pp3c1_21290V3.7	Pp3c1_21290	N/A	4	4	434	1	0	0
56964	Pp3c6_21370V3.3	Pp3c6_21370	N/A	4	4	775	0	0	499
56965	Pp3c6_21370V3.1	Pp3c6_21370	N/A	4	4	756	0	0	480
56966	Pp3c6_21370V3.2	Pp3c6_21370	N/A	4	4	775	0	0	499
56967	Pp3c6_21370V3.4	Pp3c6_21370	N/A	4	4	775	0	0	499
57025	Pp3c8_3330V3.1	Pp3c8_3330	somatic embryogenesis receptor kinase	4	4	629	0	1	295
57026	Pp3c8_3330V3.2	Pp3c8_3330	somatic embryogenesis receptor kinase	4	4	629	0	1	295
57145	PAC:32913390.CDS.1	Pp3c9_12620	N/A	4	4	451	0	0	47
57151	Pp3c1_36300V3.2	Pp3c1_36300	F27K7.6; nucleolin, putative [Arabidopsis thaliana]	4	4	394	0	0	173
57152	Pp3c1_36300V3.1	Pp3c1_36300	F27K7.6; nucleolin, putative [Arabidopsis thaliana]	4	4	394	0	0	173
57336	Pp3c2_4490V3.4	Pp3c2_4490	reg-2- had superfamily (subfamily ia) hydrolase:haloacid dehalogenase-like hydrolase domain containing 3	4	4	269	0	0	0
57337	Pp3c2_4490V3.8	Pp3c2_4490	reg-2- had superfamily (subfamily ia) hydrolase:haloacid dehalogenase-like hydrolase domain containing 3	4	4	269	0	0	0
57338	Pp3c2_4490V3.1	Pp3c2_4490	reg-2- had superfamily (subfamily ia) hydrolase:haloacid dehalogenase-like hydrolase domain containing 3	4	4	269	0	0	0
57339	Pp3c2_4490V3.6	Pp3c2_4490	reg-2- had superfamily (subfamily ia) hydrolase:haloacid dehalogenase-like hydrolase domain containing 3	4	4	269	0	0	0
57340	Pp3c2_4490V3.7	Pp3c2_4490	reg-2- had superfamily (subfamily ia) hydrolase:haloacid dehalogenase-like hydrolase domain containing 3	4	4	269	0	0	0
57341	Pp3c2_4490V3.2	Pp3c2_4490	reg-2- had superfamily (subfamily ia) hydrolase:haloacid dehalogenase-like hydrolase domain containing 3	4	4	269	0	0	0
57342	Pp3c2_4490V3.5	Pp3c2_4490	reg-2- had superfamily (subfamily ia) hydrolase:haloacid dehalogenase-like hydrolase domain containing 3	4	4	269	0	0	0
57343	Pp3c2_4490V3.3	Pp3c2_4490	reg-2- had superfamily (subfamily ia) hydrolase:haloacid dehalogenase-like hydrolase domain containing 3	4	4	269	0	0	0
57496	Pp3c4_19720V3.4	Pp3c4_19720	brassinosteroid insensitive 1-associated receptor kinase 1	4	6	671	0	0	339
57497	Pp3c4_19720V3.5	Pp3c4_19720	brassinosteroid insensitive 1-associated receptor kinase 1	4	6	671	0	0	339
57498	Pp3c4_19720V3.3	Pp3c4_19720	brassinosteroid insensitive 1-associated receptor kinase 1	4	6	671	0	0	339
57499	Pp3c4_19720V3.2	Pp3c4_19720	brassinosteroid insensitive 1-associated receptor kinase 1	4	6	671	0	0	339
57500	Pp3c4_19720V3.6	Pp3c4_19720	brassinosteroid insensitive 1-associated receptor kinase 1	4	6	671	0	0	339
57501	Pp3c4_19720V3.1	Pp3c4_19720	brassinosteroid insensitive 1-associated receptor kinase 1	4	6	671	0	0	339
57502	Pp3c4_19720V3.7	Pp3c4_19720	brassinosteroid insensitive 1-associated receptor kinase 1	4	6	671	0	0	339
57631	Pp3c2_18590V3.2	Pp3c2_18590	N/A	4	5	335	0	0	17
57632	Pp3c2_18590V3.1	Pp3c2_18590	N/A	4	4	824	0	0	17
57926	Pp3c6_28770V3.3	Pp3c6_28770	T10C21.7; WD-40 repeat protein family [Arabidopsis thaliana]	4	4	254	0	0	0
58228	Pp3c4_4240V3.1	Pp3c4_4240	N/A	4	5	343	0	0	10
58230	Pp3c4_4240V3.2	Pp3c4_4240	N/A	4	4	495	0	0	10
58405	Pp3c11_13860V3.3	Pp3c11_13860	:transcriptional factor	4	5	1755	0	1	597
58407	Pp3c11_13860V3.1	Pp3c11_13860	:transcriptional factor	4	7	1706	0	1	597
58431	Pp3c4_26780V3.2	Pp3c4_26780	argonaute protein group	4	5	822	0	0	353
58432	Pp3c4_26780V3.1	Pp3c4_26780	argonaute protein group	4	5	923	0	0	454
58433	Pp3c4_26780V3.3	Pp3c4_26780	argonaute protein group	4	5	880	0	0	411
58434	Pp3c4_26780V3.4	Pp3c4_26780	argonaute protein group	4	5	880	0	0	411
58496	Pp3c25_200V3.1	Pp3c25_200	aspartic proteinase nepenthesin-1	4	4	518	0	0	136
59050	Pp3c2_2780V3.4	Pp3c2_2780	N/A	4	5	1165	0	0	733
59051	Pp3c2_2780V3.1	Pp3c2_2780	N/A	4	5	1165	0	0	733
59052	Pp3c2_2780V3.2	Pp3c2_2780	N/A	4	5	1165	0	0	733
59053	Pp3c2_2780V3.3	Pp3c2_2780	N/A	4	5	1165	0	0	733
59125	Pp3c20_9290V3.2	Pp3c20_9290	N/A	4	5	569	0	0	367
59127	Pp3c20_9290V3.5	Pp3c20_9290	N/A	4	5	585	0	0	367
59128	Pp3c20_9290V3.3	Pp3c20_9290	N/A	4	5	569	0	0	367
59131	Pp3c20_9290V3.4	Pp3c20_9290	N/A	4	5	568	0	0	367
59168	PAC:32977719.CDS.1	Pp3c6_21750	aromatic and neutral amino acid transporter	4	4	445	0	0	232
59169	PAC:32977718.CDS.1	Pp3c6_21750	aromatic and neutral amino acid transporter	4	4	447	0	0	234
59174	Pp3c4_17440V3.3	Pp3c4_17440	hnrnp-like protein	4	4	423	0	0	19
59175	Pp3c4_17440V3.1	Pp3c4_17440	hnrnp-like protein	4	4	423	0	0	19
59176	Pp3c4_17440V3.2	Pp3c4_17440	hnrnp-like protein	4	4	423	0	0	19
59185	Pp3c4_13300V3.5	Pp3c4_13300	nuclear acid binding	4	4	391	0	0	80
59186	Pp3c4_13300V3.8	Pp3c4_13300	nuclear acid binding	4	4	453	0	0	80
59187	Pp3c4_13300V3.2	Pp3c4_13300	nuclear acid binding	4	4	453	0	0	80
59188	Pp3c4_13300V3.6	Pp3c4_13300	nuclear acid binding	4	4	453	0	0	80
59189	Pp3c4_13300V3.3	Pp3c4_13300	nuclear acid binding	4	4	391	0	0	80
59190	Pp3c4_13300V3.1	Pp3c4_13300	nuclear acid binding	4	4	453	0	0	80
59191	Pp3c4_13300V3.7	Pp3c4_13300	nuclear acid binding	4	4	393	0	0	80
59192	Pp3c4_13300V3.4	Pp3c4_13300	nuclear acid binding	4	4	391	0	0	80
59516	PAC:32968259.CDS.1	Pp3c1_17909	N/A	4	11	1144	0	0	895
59571	Pp3c6_23170V3.1	Pp3c6_23170	brassinosteroid insensitive 1-associated receptor kinase 1	4	7	633	0	0	146
59572	Pp3c6_23170V3.2	Pp3c6_23170	brassinosteroid insensitive 1-associated receptor kinase 1	4	7	633	0	0	146
59937	Pp3c19_18410V3.2	Pp3c19_18410	leucine-rich repeat receptor protein kinase exs	4	4	1435	0	0	1115
59938	Pp3c19_18410V3.3	Pp3c19_18410	leucine-rich repeat receptor protein kinase exs	4	4	1435	0	0	1115
59939	Pp3c19_18410V3.1	Pp3c19_18410	leucine-rich repeat receptor protein kinase exs	4	4	1435	0	0	1115
60158	Pp3c13_2610V3.1	Pp3c13_2610	N/A	4	7	1953	0	0	1236
60322	Pp3c1_9910V3.1	Pp3c1_9910	chalcone synthase	4	4	353	0	0	94
60323	Pp3c1_9910V3.2	Pp3c1_9910	chalcone synthase	4	4	353	0	0	94
60337	Pp3c2_12550V3.2	Pp3c2_12550	atp-binding sub-family f member 2	4	4	597	0	0	290
60338	Pp3c2_12550V3.3	Pp3c2_12550	atp-binding sub-family f member 2	4	4	597	0	0	290
60339	Pp3c2_12550V3.1	Pp3c2_12550	atp-binding sub-family f member 2	4	4	597	0	0	290
60423	Pp3c20_20860V3.1	Pp3c20_20860	auxin-induced protein	4	4	404	0	0	61
60424	Pp3c20_20860V3.3	Pp3c20_20860	auxin-induced protein	4	4	404	0	0	61
60425	Pp3c20_20860V3.2	Pp3c20_20860	auxin-induced protein	4	4	404	0	0	61
60493	Pp3c27_8310V3.1	Pp3c27_8310	rna binding	4	12	1404	0	1	445
60494	Pp3c27_8310V3.2	Pp3c27_8310	rna binding	4	12	1404	0	1	445
60509	Pp3c15_890V3.2	Pp3c15_890	aromatic and neutral amino acid transporter	4	4	420	0	0	154
60510	PAC:32927620.CDS.1	Pp3c15_890	aromatic and neutral amino acid transporter	4	4	333	0	0	67
60511	Pp3c15_890V3.1	Pp3c15_890	aromatic and neutral amino acid transporter	4	4	420	0	0	154
60512	Pp3c15_890V3.3	Pp3c15_890	aromatic and neutral amino acid transporter	4	4	420	0	0	154
60513	Pp3c15_890V3.4	Pp3c15_890	aromatic and neutral amino acid transporter	4	4	420	0	0	154
60534	Pp3c4_29750V3.5	Pp3c4_29750	nucleic acid binding	4	6	521	0	0	103
60535	Pp3c4_29750V3.4	Pp3c4_29750	nucleic acid binding	4	6	521	0	0	103
60536	Pp3c4_29750V3.3	Pp3c4_29750	nucleic acid binding	4	6	521	0	0	103
60537	Pp3c4_29750V3.7	Pp3c4_29750	nucleic acid binding	4	6	521	0	0	103
60538	Pp3c4_29750V3.1	Pp3c4_29750	nucleic acid binding	4	6	521	0	0	103
60539	Pp3c4_29750V3.2	Pp3c4_29750	nucleic acid binding	4	6	521	0	0	103
60540	Pp3c4_29750V3.6	Pp3c4_29750	nucleic acid binding	4	6	442	0	0	24
60735	Pp3c1_20290V3.3	Pp3c1_20290	F5D14.12; zinc finger (CCCH-type) family protein	4	4	483	0	0	40
60736	Pp3c1_20290V3.2	Pp3c1_20290	F5D14.12; zinc finger (CCCH-type) family protein	4	4	522	0	0	40
60737	Pp3c1_20290V3.1	Pp3c1_20290	F5D14.12; zinc finger (CCCH-type) family protein	4	4	522	0	0	40
60964	Pp3c27_1750V3.3	Pp3c27_1750	brassinosteroid insensitive 1-associated receptor kinase 1	4	7	646	0	0	336
60966	Pp3c27_1750V3.2	Pp3c27_1750	brassinosteroid insensitive 1-associated receptor kinase 1	4	7	646	0	0	336
61053	Pp3c1_39650V3.1	Pp3c1_39650	glutamate malate translocator	4	5	648	0	0	410
61054	Pp3c1_39650V3.2	Pp3c1_39650	glutamate malate translocator	4	5	598	0	0	360
61108	Pp3c9_18330V3.4	Pp3c9_18330	FCAALL.261; mitochondrial transcription termination factor-related / mTERF-related [Arabidopsis thaliana]	4	5	521	0	0	128
61109	Pp3c9_18330V3.3	Pp3c9_18330	FCAALL.261; mitochondrial transcription termination factor-related / mTERF-related [Arabidopsis thaliana]	4	5	473	0	0	80
61110	Pp3c9_18330V3.2	Pp3c9_18330	FCAALL.261; mitochondrial transcription termination factor-related / mTERF-related [Arabidopsis thaliana]	4	5	473	0	0	80
61111	Pp3c9_18330V3.1	Pp3c9_18330	FCAALL.261; mitochondrial transcription termination factor-related / mTERF-related [Arabidopsis thaliana]	4	5	521	0	0	128
61112	Pp3c9_18330V3.7	Pp3c9_18330	FCAALL.261; mitochondrial transcription termination factor-related / mTERF-related [Arabidopsis thaliana]	4	5	521	0	0	128
61113	Pp3c9_18330V3.5	Pp3c9_18330	FCAALL.261; mitochondrial transcription termination factor-related / mTERF-related [Arabidopsis thaliana]	4	5	521	0	0	128
61114	Pp3c9_18330V3.6	Pp3c9_18330	FCAALL.261; mitochondrial transcription termination factor-related / mTERF-related [Arabidopsis thaliana]	4	5	521	0	0	128
61301	Pp3c9_3590V3.2	Pp3c9_3590	auxin influx carrier component	4	7	496	0	0	105
61345	Pp3c11_19580V3.2	Pp3c11_19580	drug metabolite transporter superfamily	4	4	344	0	0	125
61346	Pp3c11_19580V3.3	Pp3c11_19580	drug metabolite transporter superfamily	4	4	344	0	0	125
61347	Pp3c11_19580V3.1	Pp3c11_19580	drug metabolite transporter superfamily	4	4	344	0	0	125
62175	Pp3c13_18090V3.1	Pp3c13_18090	N/A	4	5	425	0	0	0
62176	Pp3c13_18090V3.2	Pp3c13_18090	N/A	4	5	431	0	0	0
62178	Pp3c1_17930V3.1	Pp3c1_17930	tir-nbs-lrr resistance protein	4	11	1040	0	0	653
62228	Pp3c7_18311V3.3	Pp3c7_18311	N/A	4	6	469	0	1	81
62229	Pp3c7_18311V3.1	Pp3c7_18311	N/A	4	6	469	0	1	81
62230	Pp3c7_18311V3.2	Pp3c7_18311	N/A	4	6	469	0	1	81
62255	Pp3c12_16600V3.1	Pp3c12_16600	tpr domain containing protein	4	6	504	0	1	11
62256	Pp3c12_16600V3.2	Pp3c12_16600	tpr domain containing protein	4	6	504	0	1	11
62257	Pp3c12_16600V3.3	Pp3c12_16600	tpr domain containing protein	4	6	504	0	1	11
62725	Pp3c8_19710V3.2	Pp3c8_19710	N/A	4	5	740	0	0	470
62726	Pp3c8_19710V3.3	Pp3c8_19710	N/A	4	5	740	0	0	470
62727	Pp3c8_19710V3.4	Pp3c8_19710	N/A	4	5	740	0	0	470
62728	Pp3c8_19710V3.1	Pp3c8_19710	N/A	4	5	740	0	0	470
62983	Pp3c5_2890V3.1	Pp3c5_2890	wd repeat and fyve domain containing 3 isoform 1	4	9	3801	0	1	3130
63336	Pp3c1_22185V3.5	Pp3c1_22185	N/A	4	4	345	0	0	127
63337	Pp3c1_22185V3.4	Pp3c1_22185	N/A	4	4	345	0	0	127
63338	Pp3c1_22185V3.2	Pp3c1_22185	N/A	4	4	345	0	0	127
63339	Pp3c1_22185V3.3	Pp3c1_22185	N/A	4	4	345	0	0	127
63340	Pp3c1_22185V3.1	Pp3c1_22185	N/A	4	4	345	0	0	127
63341	PAC:32968754.CDS.1	Pp3c1_22185	N/A	4	4	271	0	0	53
63342	PAC:32968753.CDS.1	Pp3c1_22185	N/A	4	4	271	0	0	53
63359	Pp3c18_8750V3.1	Pp3c18_8750	F2N1.34; expressed protein [Arabidopsis thaliana]	4	9	1033	0	0	622
63360	Pp3c18_8750V3.2	Pp3c18_8750	F2N1.34; expressed protein [Arabidopsis thaliana]	4	9	1033	0	0	622
63478	PAC:32947031.CDS.1	Pp3c20_16450	T25C13.100; expressed protein [Arabidopsis thaliana]	4	4	728	0	0	453
63479	PAC:32947032.CDS.1	Pp3c20_16450	T25C13.100; expressed protein [Arabidopsis thaliana]	4	4	728	0	0	453
63683	Pp3c1_33790V3.3	Pp3c1_33790	atp-binding sub-family f member 2	4	4	597	0	0	290
63684	Pp3c1_33790V3.2	Pp3c1_33790	atp-binding sub-family f member 2	4	4	597	0	0	290
63685	Pp3c1_33790V3.1	Pp3c1_33790	atp-binding sub-family f member 2	4	4	597	0	0	290
63686	Pp3c11_13880V3.2	Pp3c11_13880	:transcriptional factor	4	7	2080	0	1	597
63687	Pp3c11_13880V3.1	Pp3c11_13880	:transcriptional factor	4	7	2080	0	1	597
63724	Pp3c11_24420V3.2	Pp3c11_24420	N/A	4	7	589	0	0	60
63725	Pp3c11_24420V3.1	Pp3c11_24420	N/A	4	7	589	0	0	60
63876	PAC:32933073.CDS.1	Pp3c2_38470	N/A	4	4	533	0	0	0
64029	Pp3c1_41480V3.2	Pp3c1_41480	N/A	4	5	932	0	0	674
64030	Pp3c1_41480V3.3	Pp3c1_41480	N/A	4	5	926	0	0	668
64031	Pp3c1_41480V3.1	Pp3c1_41480	N/A	4	5	932	0	0	674
64119	Pp3c17_14330V3.2	Pp3c17_14330	s-receptor kinase	4	6	942	0	0	372
64120	Pp3c17_14330V3.4	Pp3c17_14330	s-receptor kinase	4	6	942	0	0	372
64121	Pp3c17_14330V3.1	Pp3c17_14330	s-receptor kinase	4	5	757	0	0	187
64122	Pp3c17_14330V3.3	Pp3c17_14330	s-receptor kinase	4	6	942	0	0	372
64194	Pp3c14_8980V3.1	Pp3c14_8980	novel protein vertebrate solute carrier family sodium bicarbonate member 5	4	5	625	0	1	0
64195	Pp3c14_8980V3.2	Pp3c14_8980	novel protein vertebrate solute carrier family sodium bicarbonate member 5	4	5	625	0	1	0
64196	Pp3c14_8980V3.3	Pp3c14_8980	novel protein vertebrate solute carrier family sodium bicarbonate member 5	4	5	625	0	1	0
64197	Pp3c14_8980V3.5	Pp3c14_8980	novel protein vertebrate solute carrier family sodium bicarbonate member 5	4	5	632	0	1	0
64198	Pp3c14_8980V3.4	Pp3c14_8980	novel protein vertebrate solute carrier family sodium bicarbonate member 5	4	5	632	0	1	0
64326	Pp3c1_43050V3.3	Pp3c1_43050	rhomboid family protein	4	6	391	1	0	146
64327	Pp3c1_43050V3.1	Pp3c1_43050	rhomboid family protein	4	6	391	1	0	146
64328	Pp3c1_43050V3.2	Pp3c1_43050	rhomboid family protein	4	6	391	1	0	146
64590	Pp3c2_20240V3.2	Pp3c2_20240	nucleic acid binding	4	4	683	1	0	354
64592	Pp3c2_20240V3.6	Pp3c2_20240	nucleic acid binding	4	4	683	1	0	354
64593	Pp3c2_20240V3.1	Pp3c2_20240	nucleic acid binding	4	4	763	1	0	434
64594	Pp3c2_20240V3.3	Pp3c2_20240	nucleic acid binding	4	4	683	1	0	354
64595	Pp3c2_20240V3.5	Pp3c2_20240	nucleic acid binding	4	4	714	1	0	434
64739	Pp3c14_15220V3.4	Pp3c14_15220	protein kinase	4	4	607	0	0	98
64740	Pp3c14_15220V3.3	Pp3c14_15220	protein kinase	4	4	607	0	0	98
64741	Pp3c14_15220V3.2	Pp3c14_15220	protein kinase	4	4	607	0	0	98
64742	Pp3c14_15220V3.1	Pp3c14_15220	protein kinase	4	4	607	0	0	98
64743	Pp3c14_15220V3.5	Pp3c14_15220	protein kinase	4	4	607	0	0	98
64755	Pp3c25_7740V3.1	Pp3c25_7740	N/A	4	5	671	0	0	306
64756	Pp3c25_7740V3.2	Pp3c25_7740	N/A	4	5	671	0	0	306
64801	Pp3c22_19900V3.1	Pp3c22_19900	uncharacterized protein kiaa0406	4	5	1365	0	1	650
64802	Pp3c22_19900V3.2	Pp3c22_19900	uncharacterized protein kiaa0406	4	5	1365	0	1	650
64822	Pp3c4_12130V3.2	Pp3c4_12130	tpr domain containing protein	4	6	506	0	1	155
64823	Pp3c4_12130V3.3	Pp3c4_12130	tpr domain containing protein	4	6	506	0	1	155
64824	Pp3c4_12130V3.1	Pp3c4_12130	tpr domain containing protein	4	6	506	0	1	155
65047	PAC:32961769.CDS.1	Pp3c14_26902	N/A	4	4	535	0	0	0
65048	Pp3c4_12350V3.4	Pp3c4_12350	auxin-induced protein	4	5	375	0	0	104
65049	Pp3c4_12350V3.3	Pp3c4_12350	auxin-induced protein	4	5	295	0	0	24
65050	Pp3c4_12350V3.1	Pp3c4_12350	auxin-induced protein	4	5	375	0	0	104
65051	Pp3c4_12350V3.2	Pp3c4_12350	auxin-induced protein	4	5	463	0	0	192
65288	Pp3c14_19010V3.3	Pp3c14_19010	amino acid transporter, putative [Entamoeba histolytica HM-1:IMSS]	4	6	473	0	0	259
65290	Pp3c14_19010V3.1	Pp3c14_19010	amino acid transporter, putative [Entamoeba histolytica HM-1:IMSS]	4	6	473	0	0	259
65292	Pp3c14_19010V3.4	Pp3c14_19010	amino acid transporter, putative [Entamoeba histolytica HM-1:IMSS]	4	6	416	0	0	202
65770	Pp3c8_7570V3.1	Pp3c8_7570	pip2_1 gene for putative aquaporin family protein PIP2_1	4	4	279	0	0	25
65771	Pp3c8_7570V3.2	Pp3c8_7570	pip2_1 gene for putative aquaporin family protein PIP2_1	4	4	279	0	0	25
65819	Pp3c3_6440V3.1	Pp3c3_6440	regulator of chromosome condensation rcc1	4	5	466	0	0	0
65820	Pp3c3_6440V3.2	Pp3c3_6440	regulator of chromosome condensation rcc1	4	5	466	0	0	0
65821	Pp3c3_6440V3.3	Pp3c3_6440	regulator of chromosome condensation rcc1	4	5	466	0	0	0
66601	PAC:32935591.CDS.1	Pp3c2_32400	chalcone synthase	4	5	397	0	0	180
66602	PAC:32935590.CDS.1	Pp3c2_32400	chalcone synthase	4	5	397	0	0	180
66721	Pp3c12_10910V3.2	Pp3c12_10910	N/A	4	4	457	0	0	81
66723	Pp3c12_10910V3.1	Pp3c12_10910	N/A	4	4	457	0	0	81
66837	Pp3c22_12040V3.1	Pp3c22_12040	leucine-rich repeat receptor protein kinase exs	4	4	1361	0	0	1041
66838	Pp3c22_12040V3.3	Pp3c22_12040	leucine-rich repeat receptor protein kinase exs	4	4	1370	0	0	1041
66893	Pp3c15_17314V3.2	Pp3c15_17314	N/A	4	4	976	0	1	618
66894	Pp3c15_17314V3.1	Pp3c15_17314	N/A	4	4	898	0	1	540
67048	Pp3c4_12460V3.1	Pp3c4_12460	leucine-rich repeat transmembrane protein kinase	4	4	735	0	0	420
67049	Pp3c4_12460V3.4	Pp3c4_12460	leucine-rich repeat transmembrane protein kinase	4	4	735	0	0	420
67050	Pp3c4_12460V3.2	Pp3c4_12460	leucine-rich repeat transmembrane protein kinase	4	4	735	0	0	420
67051	Pp3c4_12460V3.3	Pp3c4_12460	leucine-rich repeat transmembrane protein kinase	4	4	735	0	0	420
67052	Pp3c4_12460V3.5	Pp3c4_12460	leucine-rich repeat transmembrane protein kinase	4	4	636	0	0	420
67687	Pp3c14_5110V3.2	Pp3c14_5110	CDC2+/CDC28-related protein kinase R2	4	4	213	0	0	0
67688	Pp3c14_5110V3.3	Pp3c14_5110	CDC2+/CDC28-related protein kinase R2	4	4	285	0	0	0
67689	Pp3c14_5110V3.4	Pp3c14_5110	CDC2+/CDC28-related protein kinase R2	4	5	326	0	0	0
67690	Pp3c14_5110V3.1	Pp3c14_5110	CDC2+/CDC28-related protein kinase R2	4	5	326	0	0	0
67920	Pp3c12_15740V3.4	Pp3c12_15740	transparent testa 12	4	4	541	0	0	132
67921	Pp3c12_15740V3.2	Pp3c12_15740	transparent testa 12	4	4	541	0	0	132
67922	Pp3c12_15740V3.1	Pp3c12_15740	transparent testa 12	4	4	601	0	0	192
67923	Pp3c12_15740V3.3	Pp3c12_15740	transparent testa 12	4	4	541	0	0	132
67924	Pp3c10_21310V3.2	Pp3c10_21310	mip pip subfamily	4	4	466	0	1	155
67925	Pp3c10_21310V3.3	Pp3c10_21310	mip pip subfamily	4	4	466	0	1	155
67926	Pp3c10_21310V3.1	Pp3c10_21310	mip pip subfamily	4	4	466	0	1	155
68140	Pp3c16_10250V3.1	Pp3c16_10250	mitochondrial intermediate	4	6	789	0	0	463
68141	Pp3c16_10250V3.5	Pp3c16_10250	mitochondrial intermediate	4	5	650	0	0	324
68142	Pp3c16_10250V3.4	Pp3c16_10250	mitochondrial intermediate	4	5	650	0	0	324
68143	Pp3c16_10250V3.3	Pp3c16_10250	mitochondrial intermediate	4	6	789	0	0	463
68144	Pp3c16_10250V3.2	Pp3c16_10250	mitochondrial intermediate	4	6	789	0	0	463
68427	Pp3c14_6330V3.6	Pp3c14_6330	abc transporter	4	9	1368	0	0	148
68428	Pp3c14_6330V3.1	Pp3c14_6330	abc transporter	4	9	1367	0	0	148
68429	Pp3c14_6330V3.8	Pp3c14_6330	abc transporter	4	9	1368	0	0	148
68430	Pp3c14_6330V3.4	Pp3c14_6330	abc transporter	4	9	1368	0	0	148
68431	Pp3c14_6330V3.2	Pp3c14_6330	abc transporter	4	9	1368	0	0	148
68432	Pp3c14_6330V3.9	Pp3c14_6330	abc transporter	4	9	1367	0	0	148
68433	Pp3c14_6330V3.7	Pp3c14_6330	abc transporter	4	9	1368	0	0	148
68434	Pp3c14_6330V3.5	Pp3c14_6330	abc transporter	4	9	1368	0	0	148
68435	Pp3c14_6330V3.3	Pp3c14_6330	abc transporter	4	9	1368	0	0	148
68456	Pp3c3_5810V3.1	Pp3c3_5810	phosphoenolpyruvate carboxykinase	4	5	664	0	0	323
68457	Pp3c3_5810V3.2	Pp3c3_5810	phosphoenolpyruvate carboxykinase	4	5	664	0	0	323
68458	Pp3c8_13080V3.5	Pp3c8_13080	tpa: vacuolar protein sorting-associated protein vps13 (afu_orthologue afua_4g11560)	4	14	3416	0	0	2216
68459	Pp3c8_13080V3.4	Pp3c8_13080	tpa: vacuolar protein sorting-associated protein vps13 (afu_orthologue afua_4g11560)	4	14	3416	0	0	2216
68460	Pp3c8_13080V3.7	Pp3c8_13080	tpa: vacuolar protein sorting-associated protein vps13 (afu_orthologue afua_4g11560)	4	14	3416	0	0	2216
68461	Pp3c8_13080V3.1	Pp3c8_13080	tpa: vacuolar protein sorting-associated protein vps13 (afu_orthologue afua_4g11560)	4	14	3388	0	0	2216
68462	Pp3c8_13080V3.6	Pp3c8_13080	tpa: vacuolar protein sorting-associated protein vps13 (afu_orthologue afua_4g11560)	4	14	3416	0	0	2216
68463	Pp3c8_13080V3.3	Pp3c8_13080	tpa: vacuolar protein sorting-associated protein vps13 (afu_orthologue afua_4g11560)	4	14	3416	0	0	2216
68464	Pp3c8_13080V3.2	Pp3c8_13080	tpa: vacuolar protein sorting-associated protein vps13 (afu_orthologue afua_4g11560)	4	14	3416	0	0	2216
68535	Pp3c22_22231V3.1	Pp3c22_22231	N/A	4	5	639	0	1	0
68536	Pp3c22_22231V3.2	Pp3c22_22231	N/A	4	5	639	0	1	0
69186	Pp3c21_10000V3.2	Pp3c21_10000	ammonium transporter	4	7	505	0	1	66
69187	Pp3c21_10000V3.1	Pp3c21_10000	ammonium transporter	4	7	505	0	1	66
69475	Pp3c6_19730V3.2	Pp3c6_19730	lrr receptor protein	4	7	924	0	0	642
69476	Pp3c6_19730V3.1	Pp3c6_19730	lrr receptor protein	4	7	924	0	0	642
69573	Pp3c10_1100V3.2	Pp3c10_1100	K21P3.5; pectinesterase family	4	5	573	0	1	326
69574	Pp3c10_1100V3.1	Pp3c10_1100	K21P3.5; pectinesterase family	4	5	573	0	1	326
69670	Pp3c10_15500V3.1	Pp3c10_15500	atp binding	4	5	843	0	1	364
69671	Pp3c10_15500V3.3	Pp3c10_15500	atp binding	4	5	843	0	1	364
69672	Pp3c10_15500V3.2	Pp3c10_15500	atp binding	4	5	843	0	1	364
69694	Pp3c8_3230V3.2	Pp3c8_3230	alpha beta hydrolase fold protein	4	4	518	0	0	118
69695	Pp3c8_3230V3.3	Pp3c8_3230	alpha beta hydrolase fold protein	4	4	518	0	0	118
69696	Pp3c8_3230V3.1	Pp3c8_3230	alpha beta hydrolase fold protein	4	4	518	0	0	118
70100	Pp3c12_22590V3.1	Pp3c12_22590	N/A	4	4	280	0	0	74
70101	Pp3c12_22590V3.2	Pp3c12_22590	N/A	4	4	280	0	0	74
70227	Pp3c5_11340V3.2	Pp3c5_11340	abc transporter family protein	4	4	597	0	0	290
70228	Pp3c5_11340V3.1	Pp3c5_11340	abc transporter family protein	4	4	597	0	0	290
70617	Pp3c6_17690V3.3	Pp3c6_17690	mitochondrial prohibitin complex protein 2	4	4	342	0	0	33
70881	Pp3c4_16930V3.1	Pp3c4_16930	N/A	4	5	279	0	0	10
70882	Pp3c4_16930V3.2	Pp3c4_16930	N/A	4	5	279	0	0	10
70961	Pp3c8_19980V3.1	Pp3c8_19980	unknown [Picea sitchensis]	4	4	235	0	0	0
70962	Pp3c8_19980V3.2	Pp3c8_19980	unknown [Picea sitchensis]	4	4	235	0	0	0
71319	Pp3c7_15550V3.2	Pp3c7_15550	rieske (2fe-2s) domain protein	4	4	570	0	0	317
71320	Pp3c7_15550V3.1	Pp3c7_15550	rieske (2fe-2s) domain protein	4	4	570	0	0	317
71324	Pp3c24_2970V3.1	Pp3c24_2970	auxin efflux carrier component	4	5	713	0	1	434
71325	Pp3c24_2970V3.2	Pp3c24_2970	auxin efflux carrier component	4	5	713	0	1	434
71426	Pp3c22_21990V3.1	Pp3c22_21990	high affinity nitrate transporter:nrt2_1 gene for high affinity nitrate transporter protein NRT2_1	4	4	548	0	0	211
71427	Pp3c22_21990V3.3	Pp3c22_21990	high affinity nitrate transporter:nrt2_1 gene for high affinity nitrate transporter protein NRT2_1	4	4	548	0	0	211
71428	Pp3c22_21990V3.2	Pp3c22_21990	high affinity nitrate transporter:nrt2_1 gene for high affinity nitrate transporter protein NRT2_1	4	4	548	0	0	211
71436	Pp3c3_6480V3.18	Pp3c3_6480	vacuolar proton	4	5	633	0	0	206
71437	Pp3c3_6480V3.16	Pp3c3_6480	vacuolar proton	4	5	571	0	0	144
71438	Pp3c3_6480V3.10	Pp3c3_6480	vacuolar proton	4	6	678	0	0	324
71439	Pp3c3_6480V3.13	Pp3c3_6480	vacuolar proton	4	6	751	0	0	324
71440	Pp3c3_6480V3.15	Pp3c3_6480	vacuolar proton	4	5	560	0	0	206
71441	Pp3c3_6480V3.17	Pp3c3_6480	vacuolar proton	4	5	498	0	0	144
71446	Pp3c3_6480V3.9	Pp3c3_6480	vacuolar proton	4	6	689	0	0	262
71448	Pp3c3_6480V3.8	Pp3c3_6480	vacuolar proton	4	6	616	0	0	262
71542	Pp3c16_880V3.1	Pp3c16_880	nucleobase ascorbate transporter	4	6	534	0	1	188
71543	Pp3c16_880V3.2	Pp3c16_880	nucleobase ascorbate transporter	4	6	534	0	1	188
71562	Pp3c7_22160V3.1	Pp3c7_22160	glutathione-regulated potassium-efflux system protein	4	8	1115	0	1	759
71563	Pp3c7_22160V3.3	Pp3c7_22160	glutathione-regulated potassium-efflux system protein	4	8	1252	0	1	896
71564	Pp3c7_22160V3.2	Pp3c7_22160	glutathione-regulated potassium-efflux system protein	4	8	1252	0	1	896
71580	PAC:32940157.CDS.1	Pp3c19_21520	ca2+ antiporter cation exchanger	4	7	699	0	0	326
71581	PAC:32940158.CDS.1	Pp3c19_21520	ca2+ antiporter cation exchanger	4	7	699	0	0	326
71769	Pp3c1_33410V3.7	Pp3c1_33410	lipase	4	4	350	0	1	0
71770	Pp3c1_33410V3.3	Pp3c1_33410	lipase	4	4	396	0	1	0
71771	Pp3c1_33410V3.8	Pp3c1_33410	lipase	4	4	495	0	1	93
71772	Pp3c1_33410V3.1	Pp3c1_33410	lipase	4	4	487	0	1	85
71773	Pp3c1_33410V3.6	Pp3c1_33410	lipase	4	4	396	0	1	0
71774	Pp3c1_33410V3.2	Pp3c1_33410	lipase	4	4	396	0	1	0
71775	Pp3c1_33410V3.10	Pp3c1_33410	lipase	4	4	449	0	1	93
71776	Pp3c1_33410V3.4	Pp3c1_33410	lipase	4	4	487	0	1	85
71777	Pp3c1_33410V3.5	Pp3c1_33410	lipase	4	4	396	0	1	0
71778	Pp3c1_33410V3.9	Pp3c1_33410	lipase	4	4	495	0	1	93
71787	Pp3c25_10050V3.1	Pp3c25_10050	pentatricopeptide repeat-containing	4	4	1195	0	0	207
71788	Pp3c25_10050V3.2	Pp3c25_10050	pentatricopeptide repeat-containing	4	4	863	0	0	207
71789	Pp3c25_10050V3.3	Pp3c25_10050	pentatricopeptide repeat-containing	4	4	1195	0	0	207
71812	PAC:32914623.CDS.1	Pp3c21_7660	N/A	4	5	397	0	0	180
71813	PAC:32914624.CDS.1	Pp3c21_7660	N/A	4	5	397	0	0	180
72067	Pp3c12_4660V3.1	Pp3c12_4660	Muramoyl-pentapeptide carboxypeptidase precursor (Metallo DD-peptidase) (Zn DD-peptidase) (D-alanyl-D-alanine carboxypeptidase)	4	4	654	0	0	164
72068	Pp3c12_4660V3.3	Pp3c12_4660	Muramoyl-pentapeptide carboxypeptidase precursor (Metallo DD-peptidase) (Zn DD-peptidase) (D-alanyl-D-alanine carboxypeptidase)	4	4	654	0	0	164
72069	Pp3c12_4660V3.2	Pp3c12_4660	Muramoyl-pentapeptide carboxypeptidase precursor (Metallo DD-peptidase) (Zn DD-peptidase) (D-alanyl-D-alanine carboxypeptidase)	4	4	653	0	0	164
72164	Pp3c15_5030V3.3	Pp3c15_5030	fructosamine-3-kinase-related protein	4	4	343	0	0	124
72165	Pp3c15_5030V3.1	Pp3c15_5030	fructosamine-3-kinase-related protein	4	4	343	0	0	124
72166	Pp3c15_5030V3.2	Pp3c15_5030	fructosamine-3-kinase-related protein	4	4	343	0	0	124
72351	Pp3c27_2280V3.5	Pp3c27_2280	receptor protein	4	4	663	0	0	449
72352	Pp3c27_2280V3.1	Pp3c27_2280	receptor protein	4	4	663	0	0	449
72353	Pp3c27_2280V3.3	Pp3c27_2280	receptor protein	4	4	663	0	0	449
72354	Pp3c27_2280V3.4	Pp3c27_2280	receptor protein	4	4	663	0	0	449
72355	Pp3c27_2280V3.2	Pp3c27_2280	receptor protein	4	4	663	0	0	449
72358	Pp3c27_2280V3.6	Pp3c27_2280	receptor protein	4	4	663	0	0	449
72886	Pp3c1_70V3.1	Pp3c1_70	:nig (nsp (nuclear shuttle protein)-interacting gtpase) gtp binding gtpase	4	5	585	0	1	188
72887	Pp3c1_70V3.2	Pp3c1_70	:nig (nsp (nuclear shuttle protein)-interacting gtpase) gtp binding gtpase	4	5	585	0	1	188
72904	Pp3c14_8070V3.1	Pp3c14_8070	N/A	4	10	621	0	0	25
72905	Pp3c14_11150V3.2	Pp3c14_11150	abc transporter domain protein	4	7	554	0	0	99
72906	Pp3c14_11150V3.1	Pp3c14_11150	abc transporter domain protein	4	7	554	0	0	99
73146	Pp3c1_23260V3.2	Pp3c1_23260	glucose-6-phosphate 1-dehydrogenase	4	5	595	0	0	120
73147	Pp3c1_23260V3.1	Pp3c1_23260	glucose-6-phosphate 1-dehydrogenase	4	5	595	0	0	120
73152	Pp3c16_16830V3.3	Pp3c16_16830	mn2+ fe2+ nramp family	4	8	1545	0	0	48
73153	Pp3c16_16830V3.1	Pp3c16_16830	mn2+ fe2+ nramp family	4	7	1445	0	0	0
73154	Pp3c16_16830V3.2	Pp3c16_16830	mn2+ fe2+ nramp family	4	8	1545	0	0	48
73697	Pp3c5_4350V3.3	Pp3c5_4350	serine threonine-protein kinase	4	5	573	0	0	197
73698	Pp3c5_4350V3.1	Pp3c5_4350	serine threonine-protein kinase	4	5	573	0	0	197
73699	Pp3c5_4350V3.5	Pp3c5_4350	serine threonine-protein kinase	4	5	574	0	0	198
73700	Pp3c5_4350V3.4	Pp3c5_4350	serine threonine-protein kinase	4	5	574	0	0	198
73701	Pp3c5_4350V3.2	Pp3c5_4350	serine threonine-protein kinase	4	5	573	0	0	197
73717	Pp3c14_9160V3.2	Pp3c14_9160	N/A	4	4	446	0	1	0
73718	Pp3c14_9160V3.1	Pp3c14_9160	N/A	4	4	446	0	1	0
73719	Pp3c2_12940V3.1	Pp3c2_12940	F10D13.30; leucine-rich repeat family protein	4	6	1068	0	0	71
74084	Pp3c13_4780V3.2	Pp3c13_4780	receptor-like protein kinase homolog	4	4	472	0	0	175
74085	Pp3c13_4780V3.1	Pp3c13_4780	receptor-like protein kinase homolog	4	4	472	0	0	175
74186	Pp3c10_16930V3.7	Pp3c10_16930	atp binding	4	6	1398	0	0	483
74188	Pp3c10_16930V3.5	Pp3c10_16930	atp binding	4	6	1252	0	0	337
74189	Pp3c10_16930V3.2	Pp3c10_16930	atp binding	4	6	1352	0	0	483
74192	Pp3c10_16930V3.4	Pp3c10_16930	atp binding	4	6	1398	0	0	483
74232	Pp3c15_15840V3.3	Pp3c15_15840	auxin efflux carrier auxin transport protein	4	4	333	0	0	0
74233	Pp3c15_15840V3.1	Pp3c15_15840	auxin efflux carrier auxin transport protein	4	4	429	0	0	0
74234	Pp3c15_15840V3.2	Pp3c15_15840	auxin efflux carrier auxin transport protein	4	4	429	0	0	0
74306	Pp3c5_14860V3.13	Pp3c5_14860	N/A	4	5	1274	0	0	317
74307	Pp3c5_14860V3.7	Pp3c5_14860	N/A	4	5	1211	0	0	294
74308	Pp3c5_14860V3.12	Pp3c5_14860	N/A	4	5	1104	0	0	147
74309	Pp3c5_14860V3.5	Pp3c5_14860	N/A	4	5	1234	0	0	317
74310	Pp3c5_14860V3.10	Pp3c5_14860	N/A	4	5	1201	0	0	244
74311	Pp3c5_14860V3.8	Pp3c5_14860	N/A	4	5	1211	0	0	294
74312	Pp3c5_14860V3.9	Pp3c5_14860	N/A	4	5	1201	0	0	244
74313	Pp3c5_14860V3.1	Pp3c5_14860	N/A	4	5	1064	0	0	147
74314	Pp3c5_14860V3.11	Pp3c5_14860	N/A	4	5	1161	0	0	244
74315	Pp3c5_14860V3.3	Pp3c5_14860	N/A	4	5	1251	0	0	294
74316	Pp3c5_14860V3.6	Pp3c5_14860	N/A	4	5	1234	0	0	317
74317	Pp3c5_14860V3.2	Pp3c5_14860	N/A	4	5	1274	0	0	317
74318	Pp3c5_14860V3.4	Pp3c5_14860	N/A	4	5	1251	0	0	294
75696	Pp3c26_710V3.1	Pp3c26_710	N/A	4	4	247	0	0	18
75767	Pp3c25_11400V3.2	Pp3c25_11400	metal ion binding	4	4	258	0	0	0
75768	Pp3c25_11400V3.1	Pp3c25_11400	metal ion binding	4	4	269	0	0	1
75798	Pp3c2_30340V3.2	Pp3c2_30340	receptor-like kinase	4	5	583	0	1	233
75799	Pp3c2_30340V3.1	Pp3c2_30340	receptor-like kinase	4	5	791	0	1	441
75893	Pp3c2_15960V3.2	Pp3c2_15960	alpha-l-fucosidase 2	4	4	402	0	1	0
75894	Pp3c2_15960V3.3	Pp3c2_15960	alpha-l-fucosidase 2	4	4	437	0	1	0
75895	Pp3c2_15960V3.1	Pp3c2_15960	alpha-l-fucosidase 2	4	4	402	0	1	0
76217	Pp3c16_16670V3.2	Pp3c16_16670	glutamyl-trna amidotransferase a subunit	4	6	560	0	0	130
76218	Pp3c16_16670V3.1	Pp3c16_16670	glutamyl-trna amidotransferase a subunit	4	6	560	0	0	130
76455	Pp3c15_5330V3.1	Pp3c15_5330	receptor protein kinase perk1	4	4	801	0	0	332
76456	Pp3c15_5330V3.2	Pp3c15_5330	receptor protein kinase perk1	4	4	801	0	0	332
76557	Pp3c25_5290V3.1	Pp3c25_5290	s-locus lectin protein kinase family protein	4	4	899	0	0	379
76558	Pp3c25_5290V3.2	Pp3c25_5290	s-locus lectin protein kinase family protein	4	4	899	0	0	379
76861	Pp3c26_12230V3.2	Pp3c26_12230	chlorophyll a b binding:light-harvesting complex ii protein lhcb5	4	4	297	0	0	80
76862	Pp3c26_12230V3.1	Pp3c26_12230	chlorophyll a b binding:light-harvesting complex ii protein lhcb5	4	4	297	0	0	80
77771	Pp3c2_17090V3.1	Pp3c2_17090	F15K9.5; BSD domain-containing protein [Arabidopsis thaliana]	4	4	440	1	0	0
77772	Pp3c2_17090V3.2	Pp3c2_17090	F15K9.5; BSD domain-containing protein [Arabidopsis thaliana]	4	4	440	1	0	0
77903	Pp3c10_15730V3.1	Pp3c10_15730	MKP11.2; expressed protein	4	4	274	0	0	72
77904	Pp3c10_15730V3.2	Pp3c10_15730	MKP11.2; expressed protein	4	4	274	0	0	72
78164	Pp3c3_25240V3.6	Pp3c3_25240	u2 snrnp auxiliary small	4	5	803	0	0	166
78168	Pp3c3_25240V3.1	Pp3c3_25240	u2 snrnp auxiliary small	4	5	803	0	0	166
78425	Pp3c26_6540V3.1	Pp3c26_6540	metallophosphoesterase	4	4	316	0	0	23
78426	Pp3c26_6540V3.2	Pp3c26_6540	metallophosphoesterase	4	4	316	0	0	23
78876	Pp3c25_4480V3.1	Pp3c25_4480	N/A	4	5	961	0	0	184
78877	Pp3c25_4480V3.3	Pp3c25_4480	N/A	4	5	961	0	0	184
78878	Pp3c25_4480V3.2	Pp3c25_4480	N/A	4	5	961	0	0	184
79091	Pp3c23_7050V3.3	Pp3c23_7050	polycomb enhancer protein	4	4	497	0	0	286
79092	Pp3c23_7050V3.2	Pp3c23_7050	polycomb enhancer protein	4	4	497	0	0	286
79093	Pp3c23_7050V3.1	Pp3c23_7050	polycomb enhancer protein	4	4	497	0	0	286
79094	Pp3c23_7050V3.4	Pp3c23_7050	polycomb enhancer protein	4	4	500	0	0	289
79402	Pp3c13_17110V3.1	Pp3c13_17110	N/A	4	4	432	0	0	216
79403	Pp3c13_17110V3.2	Pp3c13_17110	N/A	4	4	432	0	0	216
79477	Pp3c12_21290V3.2	Pp3c12_21290	:rest corepressor 3	4	8	2514	0	0	0
79478	Pp3c12_21290V3.5	Pp3c12_21290	:rest corepressor 3	4	8	2341	0	0	0
79479	Pp3c12_21290V3.3	Pp3c12_21290	:rest corepressor 3	4	8	2565	0	0	0
79480	Pp3c12_21290V3.4	Pp3c12_21290	:rest corepressor 3	4	8	2460	0	0	0
79481	Pp3c12_21290V3.1	Pp3c12_21290	:rest corepressor 3	4	8	2514	0	0	0
79482	Pp3c12_21290V3.7	Pp3c12_21290	:rest corepressor 3	4	8	2580	0	0	0
79483	Pp3c12_21290V3.6	Pp3c12_21290	:rest corepressor 3	4	8	2315	0	0	0
79565	Pp3c19_5280V3.5	Pp3c19_5280	peptidase m50	4	7	539	0	0	192
79566	Pp3c19_5280V3.3	Pp3c19_5280	peptidase m50	4	7	600	0	0	192
79567	Pp3c19_5280V3.4	Pp3c19_5280	peptidase m50	4	7	600	0	0	192
79568	Pp3c19_5280V3.1	Pp3c19_5280	peptidase m50	4	7	600	0	0	192
79569	Pp3c19_5280V3.2	Pp3c19_5280	peptidase m50	4	7	600	0	0	192
79801	Pp3c1_33540V3.2	Pp3c1_33540	heterogeneous nuclear ribonucleoprotein	4	4	241	0	0	0
79802	Pp3c1_33540V3.1	Pp3c1_33540	heterogeneous nuclear ribonucleoprotein	4	4	247	0	0	0
79908	Pp3c3_36650V3.2	Pp3c3_36650	b chain crystal structure of a pyrimidine degrading enzyme from drosophila melanogaster	4	4	440	0	0	153
79909	Pp3c3_36650V3.1	Pp3c3_36650	b chain crystal structure of a pyrimidine degrading enzyme from drosophila melanogaster	4	4	440	0	0	153
79974	PAC:32947261.CDS.1	Pp3c20_17290	MDK4.1; protein kinase family	4	6	873	0	0	509
79975	PAC:32947262.CDS.1	Pp3c20_17290	MDK4.1; protein kinase family	4	6	873	0	0	509
80245	Pp3c13_4250V3.2	Pp3c13_4250	phosphoenolpyruvate carboxykinase	4	5	668	0	0	327
80246	Pp3c13_4250V3.1	Pp3c13_4250	phosphoenolpyruvate carboxykinase	4	5	668	0	0	327
80278	Pp3c3_36320V3.5	Pp3c3_36320	pentatricopeptide repeat-containing	4	6	393	0	1	0
80279	Pp3c3_36320V3.1	Pp3c3_36320	pentatricopeptide repeat-containing	4	6	431	0	1	0
80280	Pp3c3_36320V3.2	Pp3c3_36320	pentatricopeptide repeat-containing	4	6	366	0	1	0
80281	Pp3c3_36320V3.3	Pp3c3_36320	pentatricopeptide repeat-containing	4	6	435	0	1	0
80282	Pp3c3_36320V3.4	Pp3c3_36320	pentatricopeptide repeat-containing	4	6	393	0	1	0
80575	PAC:32947020.CDS.1	Pp3c20_17990	N/A	4	4	289	0	0	19
80576	PAC:32947019.CDS.1	Pp3c20_17990	N/A	4	4	289	0	0	19
80853	PAC:32981518.CDS.1	Pp3c18_22220	ammonium transporter	4	6	511	0	1	66
80854	PAC:32981519.CDS.1	Pp3c18_22220	ammonium transporter	4	6	511	0	1	66
80855	PAC:32981522.CDS.1	Pp3c18_22220	ammonium transporter	4	6	511	0	1	66
80856	Pp3c18_22220V3.6	Pp3c18_22220	ammonium transporter	4	7	538	0	1	0
80857	PAC:32981520.CDS.1	Pp3c18_22220	ammonium transporter	4	6	511	0	1	66
80858	PAC:32981521.CDS.1	Pp3c18_22220	ammonium transporter	4	6	511	0	1	66
80889	Pp3c24_13630V3.10	Pp3c24_13630	chaperone protein	4	4	335	0	0	0
80890	Pp3c24_13630V3.8	Pp3c24_13630	chaperone protein	4	4	335	0	0	0
80891	Pp3c24_13630V3.7	Pp3c24_13630	chaperone protein	4	4	335	0	0	0
80892	Pp3c24_13630V3.3	Pp3c24_13630	chaperone protein	4	4	335	0	0	0
80893	Pp3c24_13630V3.1	Pp3c24_13630	chaperone protein	4	4	335	0	0	0
80894	Pp3c24_13630V3.9	Pp3c24_13630	chaperone protein	4	4	335	0	0	0
80895	Pp3c24_13630V3.5	Pp3c24_13630	chaperone protein	4	4	335	0	0	0
80896	Pp3c24_13630V3.4	Pp3c24_13630	chaperone protein	4	4	335	0	0	0
80897	Pp3c24_13630V3.2	Pp3c24_13630	chaperone protein	4	4	335	0	0	0
80899	Pp3c24_13630V3.6	Pp3c24_13630	chaperone protein	4	4	335	0	0	0
81458	Pp3c6_26510V3.2	Pp3c6_26510	inorganic phosphate	4	6	526	0	0	20
81459	Pp3c6_26510V3.5	Pp3c6_26510	inorganic phosphate	4	6	526	0	0	20
81460	Pp3c6_26510V3.1	Pp3c6_26510	inorganic phosphate	4	6	526	0	0	20
81461	Pp3c6_26510V3.3	Pp3c6_26510	inorganic phosphate	4	6	526	0	0	20
81462	Pp3c6_26510V3.4	Pp3c6_26510	inorganic phosphate	4	6	526	0	0	20
82077	Pp3c4_28040V3.1	Pp3c4_28040	vacuolar proton	4	5	691	0	0	330
82078	Pp3c4_28040V3.2	Pp3c4_28040	vacuolar proton	4	5	652	0	0	291
82079	Pp3c4_28040V3.3	Pp3c4_28040	vacuolar proton	4	5	685	0	0	324
82266	Pp3c12_4860V3.6	Pp3c12_4860	MDJ14.17; expressed protein	4	5	1160	0	1	16
82267	Pp3c12_4860V3.3	Pp3c12_4860	MDJ14.17; expressed protein	4	5	1160	0	1	16
82268	Pp3c12_4860V3.4	Pp3c12_4860	MDJ14.17; expressed protein	4	5	1160	0	1	16
82269	Pp3c12_4860V3.1	Pp3c12_4860	MDJ14.17; expressed protein	4	5	1160	0	1	16
82270	Pp3c12_4860V3.2	Pp3c12_4860	MDJ14.17; expressed protein	4	5	1160	0	1	16
82271	Pp3c12_4860V3.5	Pp3c12_4860	MDJ14.17; expressed protein	4	5	1160	0	1	16
82577	Pp3c16_2190V3.1	Pp3c16_2190	N/A	4	5	705	0	0	379
83076	Pp3c5_25690V3.4	Pp3c5_25690	F28M20.140; ubiquitin carboxyl-terminal hydrolase family protein / zinc finger (MYND type) family protein	4	5	1120	0	0	198
83077	Pp3c5_25690V3.3	Pp3c5_25690	F28M20.140; ubiquitin carboxyl-terminal hydrolase family protein / zinc finger (MYND type) family protein	4	5	1133	0	0	211
83078	Pp3c5_25690V3.2	Pp3c5_25690	F28M20.140; ubiquitin carboxyl-terminal hydrolase family protein / zinc finger (MYND type) family protein	4	5	1197	0	0	275
83079	Pp3c5_25690V3.1	Pp3c5_25690	F28M20.140; ubiquitin carboxyl-terminal hydrolase family protein / zinc finger (MYND type) family protein	4	5	1197	0	0	275
83667	Pp3c17_4790V3.1	Pp3c17_4790	N/A	4	4	217	0	1	0
84017	PAC:32913737.CDS.1	Pp3c9_25330	N/A	4	4	290	0	0	87
84018	PAC:32913738.CDS.1	Pp3c9_25330	N/A	4	4	290	0	0	87
84270	Pp3c2_19660V3.3	Pp3c2_19660	ca2+ antiporter cation exchanger	4	4	448	1	1	0
84271	Pp3c2_19660V3.2	Pp3c2_19660	ca2+ antiporter cation exchanger	4	4	448	1	1	0
84272	Pp3c2_19660V3.1	Pp3c2_19660	ca2+ antiporter cation exchanger	4	4	448	1	1	0
84415	Pp3c16_20760V3.1	Pp3c16_20760	phosphoglucomutase	4	5	581	0	0	190
84416	Pp3c16_20760V3.2	Pp3c16_20760	phosphoglucomutase	4	5	581	0	0	190
84486	PAC:32936174.CDS.1	Pp3c2_30620	chalcone synthase	4	5	397	0	0	180
84487	PAC:32936175.CDS.1	Pp3c2_30620	chalcone synthase	4	5	397	0	0	180
84649	Pp3c21_2290V3.1	Pp3c21_2290	peptidase m50	4	6	579	0	0	175
84650	Pp3c21_2290V3.2	Pp3c21_2290	peptidase m50	4	6	579	0	0	175
84814	Pp3c12_20160V3.2	Pp3c12_20160	abc transporter cholesterol phospholipid flippase	4	5	981	0	0	335
84815	Pp3c12_20160V3.4	Pp3c12_20160	abc transporter cholesterol phospholipid flippase	4	5	762	0	0	335
84816	Pp3c12_20160V3.1	Pp3c12_20160	abc transporter cholesterol phospholipid flippase	4	5	981	0	0	335
84842	Pp3c8_19000V3.2	Pp3c8_19000	proline transporter	4	7	462	0	0	95
84843	Pp3c8_19000V3.1	Pp3c8_19000	proline transporter	4	7	462	0	0	95
85086	Pp3c4_28410V3.2	Pp3c4_28410	light-harvesting complex ii protein lhcb5	4	4	207	0	0	0
85087	Pp3c4_28410V3.1	Pp3c4_28410	light-harvesting complex ii protein lhcb5	4	4	207	0	0	0
85114	Pp3c16_12630V3.1	Pp3c16_12630	fk506 binding protein	4	4	293	0	1	61
85115	Pp3c16_12630V3.2	Pp3c16_12630	fk506 binding protein	4	4	293	0	1	61
85165	Pp3c9_5720V3.1	Pp3c9_5720	novel protein	4	4	289	0	0	54
85166	Pp3c9_5720V3.2	Pp3c9_5720	novel protein	4	4	289	0	0	54
85396	Pp3c15_20200V3.2	Pp3c15_20200	myrosinase binding protein	4	5	325	0	1	32
85397	Pp3c15_20200V3.1	Pp3c15_20200	myrosinase binding protein	4	5	325	0	1	32
85398	Pp3c15_20200V3.3	Pp3c15_20200	myrosinase binding protein	4	4	262	0	1	36
85437	PAC:32957718.CDS.1	Pp3c11_2990	chalcone synthase	4	5	402	0	0	186
85438	PAC:32957719.CDS.1	Pp3c11_2990	chalcone synthase	4	5	402	0	0	186
85807	Pp3c5_14260V3.6	Pp3c5_14260	nucleobase ascorbate transporter	4	6	534	0	0	188
85808	Pp3c5_14260V3.7	Pp3c5_14260	nucleobase ascorbate transporter	4	6	534	0	0	188
85809	Pp3c5_14260V3.4	Pp3c5_14260	nucleobase ascorbate transporter	4	6	534	0	0	188
85810	Pp3c5_14260V3.10	Pp3c5_14260	nucleobase ascorbate transporter	4	6	534	0	0	188
85812	Pp3c5_14260V3.2	Pp3c5_14260	nucleobase ascorbate transporter	4	6	534	0	0	188
85813	Pp3c5_14260V3.1	Pp3c5_14260	nucleobase ascorbate transporter	4	6	534	0	0	188
85814	Pp3c5_14260V3.5	Pp3c5_14260	nucleobase ascorbate transporter	4	6	534	0	0	188
85815	Pp3c5_14260V3.11	Pp3c5_14260	nucleobase ascorbate transporter	4	6	534	0	0	188
85818	Pp3c5_14260V3.3	Pp3c5_14260	nucleobase ascorbate transporter	4	6	534	0	0	188
85892	Pp3c25_1050V3.1	Pp3c25_1050	nuclear transcription x-box binding 1	4	7	1295	0	0	4
86150	Pp3c2_28260V3.1	Pp3c2_28260	T12B11.9; expressed protein [Arabidopsis thaliana]	4	5	390	0	0	72
86208	Pp3c8_13930V3.1	Pp3c8_13930	phenylalanine hydroxylase	4	5	394	0	0	188
86209	Pp3c8_13930V3.4	Pp3c8_13930	phenylalanine hydroxylase	4	5	394	0	0	188
86210	Pp3c8_13930V3.2	Pp3c8_13930	phenylalanine hydroxylase	4	5	394	0	0	188
86211	Pp3c8_13930V3.3	Pp3c8_13930	phenylalanine hydroxylase	4	5	394	0	0	188
59	Pp3c14_2730V3.2	Pp3c14_2730	dna-directed rna polymerase i largest	3	5	1716	0	0	647
60	Pp3c14_2730V3.1	Pp3c14_2730	dna-directed rna polymerase i largest	3	5	1716	0	0	647
158	Pp3c14_19170V3.1	Pp3c14_19170	N/A	3	3	331	0	0	120
159	Pp3c14_19170V3.2	Pp3c14_19170	N/A	3	3	331	0	0	120
203	Pp3c8_3850V3.2	Pp3c8_3850	N/A	3	4	496	0	0	207
204	Pp3c8_3850V3.1	Pp3c8_3850	N/A	3	4	496	0	0	207
219	Pp3c9_4480V3.1	Pp3c9_4480	expressed protein [Cryptococcus neoformans var. neoformans JEC21]	3	3	268	0	0	1
220	Pp3c9_4480V3.2	Pp3c9_4480	expressed protein [Cryptococcus neoformans var. neoformans JEC21]	3	3	268	0	0	1
221	Pp3c9_4480V3.3	Pp3c9_4480	expressed protein [Cryptococcus neoformans var. neoformans JEC21]	3	3	214	0	0	0
224	Pp3c1_36530V3.2	Pp3c1_36530	Subtilisin-like protease precursor (Cucumisin-like serine protease)	3	6	795	0	1	429
225	Pp3c1_36530V3.1	Pp3c1_36530	Subtilisin-like protease precursor (Cucumisin-like serine protease)	3	6	795	0	1	429
226	Pp3c1_36530V3.3	Pp3c1_36530	Subtilisin-like protease precursor (Cucumisin-like serine protease)	3	6	795	0	1	429
258	Pp3c26_10420V3.1	Pp3c26_10420	hnrnp-like protein	3	3	413	0	0	14
259	Pp3c26_10420V3.2	Pp3c26_10420	hnrnp-like protein	3	3	413	0	0	14
262	Pp3c1_13060V3.1	Pp3c1_13060	F24J5.20; alpha-xylosidase (XYL1) [Arabidopsis thaliana]:F24J5.20; alpha-xylosidase (XYL1)	3	4	934	0	0	116
263	Pp3c1_13060V3.2	Pp3c1_13060	F24J5.20; alpha-xylosidase (XYL1) [Arabidopsis thaliana]:F24J5.20; alpha-xylosidase (XYL1)	3	4	934	0	0	116
386	Pp3c12_9280V3.3	Pp3c12_9280	N/A	3	3	609	0	0	376
387	Pp3c12_9280V3.2	Pp3c12_9280	N/A	3	3	614	0	0	381
388	Pp3c12_9280V3.1	Pp3c12_9280	N/A	3	3	614	0	0	381
473	Pp3c11_18290V3.4	Pp3c11_18290	contains EST(s): AU173140(R1319) [Oryza sativa (japonica cultivar-group)]	3	4	852	0	0	26
474	Pp3c11_18290V3.3	Pp3c11_18290	contains EST(s): AU173140(R1319) [Oryza sativa (japonica cultivar-group)]	3	4	1087	0	0	331
475	Pp3c11_18290V3.5	Pp3c11_18290	contains EST(s): AU173140(R1319) [Oryza sativa (japonica cultivar-group)]	3	4	1157	0	0	331
476	Pp3c11_18290V3.2	Pp3c11_18290	contains EST(s): AU173140(R1319) [Oryza sativa (japonica cultivar-group)]	3	4	1157	0	0	331
477	Pp3c11_18290V3.1	Pp3c11_18290	contains EST(s): AU173140(R1319) [Oryza sativa (japonica cultivar-group)]	3	4	1157	0	0	331
534	Pp3c14_4760V3.1	Pp3c14_4760	ran gtpase binding	3	5	1222	0	1	380
535	Pp3c14_4760V3.3	Pp3c14_4760	ran gtpase binding	3	5	1222	0	1	380
536	Pp3c14_4760V3.2	Pp3c14_4760	ran gtpase binding	3	5	1222	0	1	380
548	Pp3c2_23720V3.2	Pp3c2_23720	poly polymerase	3	5	1154	0	1	846
549	Pp3c2_23720V3.1	Pp3c2_23720	poly polymerase	3	5	1154	0	1	846
550	Pp3c2_23720V3.4	Pp3c2_23720	poly polymerase	3	4	1107	0	1	799
551	Pp3c2_23720V3.3	Pp3c2_23720	poly polymerase	3	5	1154	0	1	846
612	Pp3c21_13380V3.2	Pp3c21_13380	protein kinase (ame2 afc1)	3	3	425	0	0	62
613	Pp3c21_13380V3.1	Pp3c21_13380	protein kinase (ame2 afc1)	3	3	417	0	0	54
627	Pp3c23_8110V3.1	Pp3c23_8110	K14A17.3; peroxidase, putative [EC:1.11.1.7] [KO:K00430] [Arabidopsis thaliana]	3	3	320	0	0	0
628	Pp3c23_8110V3.2	Pp3c23_8110	K14A17.3; peroxidase, putative [EC:1.11.1.7] [KO:K00430] [Arabidopsis thaliana]	3	3	320	0	0	0
717	Pp3c8_21620V3.2	Pp3c8_21620	dna polymerase	3	8	1377	0	0	666
718	Pp3c8_21620V3.1	Pp3c8_21620	dna polymerase	3	8	1377	0	0	666
798	Pp3c8_13570V3.1	Pp3c8_13570	class iv chitinase	3	3	288	0	0	44
799	Pp3c8_13570V3.2	Pp3c8_13570	class iv chitinase	3	3	288	0	0	44
804	Pp3c16_20080V3.1	Pp3c16_20080	2og-fe oxygenase	3	4	457	0	0	98
805	Pp3c16_20080V3.2	Pp3c16_20080	2og-fe oxygenase	3	4	457	0	0	98
819	Pp3c3_35240V3.1	Pp3c3_35240	pectin methylesterase	3	3	370	0	1	131
820	Pp3c3_35240V3.2	Pp3c3_35240	pectin methylesterase	3	3	370	0	1	131
825	Pp3c2_32690V3.3	Pp3c2_32690	MJK13.9; regulator of chromosome condensation (RCC1) family protein [Arabidopsis thaliana]	3	4	489	0	1	253
826	Pp3c2_32690V3.1	Pp3c2_32690	MJK13.9; regulator of chromosome condensation (RCC1) family protein [Arabidopsis thaliana]	3	4	489	0	1	253
828	Pp3c2_32690V3.4	Pp3c2_32690	MJK13.9; regulator of chromosome condensation (RCC1) family protein [Arabidopsis thaliana]	3	4	453	0	1	217
857	Pp3c4_28250V3.1	Pp3c4_28250	N/A	3	6	1032	0	0	548
858	Pp3c4_28250V3.4	Pp3c4_28250	N/A	3	6	1032	0	0	548
859	Pp3c4_28250V3.3	Pp3c4_28250	N/A	3	6	1032	0	0	548
860	Pp3c4_28250V3.6	Pp3c4_28250	N/A	3	6	1032	0	0	548
861	Pp3c4_28250V3.5	Pp3c4_28250	N/A	3	6	1032	0	0	548
862	Pp3c4_28250V3.2	Pp3c4_28250	N/A	3	6	1032	0	0	548
1071	Pp3c1_4210V3.1	Pp3c1_4210	lrr receptor protein	3	5	918	0	0	657
1072	Pp3c1_4210V3.2	Pp3c1_4210	lrr receptor protein	3	5	918	0	0	657
1127	Pp3c10_20140V3.1	Pp3c10_20140	pectate lyase	3	4	408	0	0	85
1128	Pp3c10_20140V3.2	Pp3c10_20140	pectate lyase	3	4	408	0	0	85
1219	Pp3c7_7770V3.1	Pp3c7_7770	stress-induced protein sti1-like protein	3	3	596	0	0	0
1220	Pp3c5_9970V3.1	Pp3c5_9970	Calcineurin B-like protein 3 (SOS3-like calcium-binding protein 6)	3	3	239	0	0	0
1221	Pp3c5_9970V3.2	Pp3c5_9970	Calcineurin B-like protein 3 (SOS3-like calcium-binding protein 6)	3	3	239	0	0	0
1278	PAC:32961454.CDS.1	Pp3c14_9050	integral membrane family expressed	3	3	352	0	0	93
1279	PAC:32961453.CDS.1	Pp3c14_9050	integral membrane family expressed	3	3	352	0	0	93
1291	Pp3c8_14530V3.1	Pp3c8_14530	glutamate carboxypeptidase	3	3	776	0	0	380
1295	Pp3c11_19560V3.1	Pp3c11_19560	MGL6.15; chloroplast outer membrane protein, putative [Arabidopsis thaliana]	3	9	1488	0	1	66
1337	Pp3c6_280V3.2	Pp3c6_280	g patch domain containing 1	3	5	1044	0	1	251
1338	Pp3c6_280V3.3	Pp3c6_280	g patch domain containing 1	3	5	1052	0	1	251
1339	Pp3c6_280V3.1	Pp3c6_280	g patch domain containing 1	3	5	1052	0	1	251
1402	Pp3c19_17670V3.1	Pp3c19_17670	bag6 (bcl-2-associated athanogene 6) calmodulin binding protein binding	3	3	1483	0	0	980
1403	Pp3c19_17670V3.2	Pp3c19_17670	bag6 (bcl-2-associated athanogene 6) calmodulin binding protein binding	3	3	1483	0	0	980
1438	Pp3c13_18000V3.3	Pp3c13_18000	receptor-like kinase	3	3	868	0	0	524
1439	Pp3c13_18000V3.1	Pp3c13_18000	receptor-like kinase	3	3	864	0	0	520
1440	Pp3c13_18000V3.2	Pp3c13_18000	receptor-like kinase	3	3	864	0	0	520
1573	Pp3c18_8320V3.5	Pp3c18_8320	cog0778: nitroreductase	3	4	624	0	0	370
[truncated: 42,709 more rows]
