# Supplementary material for: Identification of nuclear pore proteins at plasmodesmata: potential role in intercellular transport?
Source: bioRxiv preprint, doi:10.1101/2024.09.02.610746, version 5 (2026-04-15)
Supplement: file S2 [file 610746_file03.xlsx]

## Sheet: results_with_index_and_genes
#	Gene	Gene Name	max #FG in 200 window	#FG	Length	#GLFG	#xFxFG	Start of Max Window
0	AT1G01010.1	NAC domain containing protein 1	1	1	429	0	0	0
3	AT1G01020.3	ARV1 family protein	1	1	236	0	0	0
4	AT1G01020.4	ARV1 family protein	1	1	236	0	0	0
7	AT1G01030.1	AP2/B3-like transcriptional factor family protein	3	3	358	0	0	88
8	AT1G01030.2	AP2/B3-like transcriptional factor family protein	1	1	335	0	0	65
1967	AT1G10390.1	Nucleoporin autopeptidase	27	65	1041	0	1	120
1968	AT1G10390.2	Nucleoporin autopeptidase	27	65	1041	0	1	120
17	AT1G01060.5	Homeodomain-like superfamily protein	1	1	643	0	0	0
18	AT1G01060.6	Homeodomain-like superfamily protein	1	1	643	0	0	0
23	AT1G01080.1	RNA-binding (RRM/RBD/RNP motifs) family protein	2	2	293	0	0	36
24	AT1G01080.2	RNA-binding (RRM/RBD/RNP motifs) family protein	2	2	294	0	0	37
25	AT1G01080.3	RNA-binding (RRM/RBD/RNP motifs) family protein	2	2	286	0	0	36
1969	AT1G10390.3	Nucleoporin autopeptidase	27	65	1041	0	1	120
31	AT1G01110.1	IQ-domain 18	1	1	364	0	0	130
32	AT1G01110.2	IQ-domain 18	1	1	527	0	0	293
33	AT1G01120.1	3-ketoacyl-CoA synthase 1	3	4	528	0	0	289
35	AT1G01140.1	CBL-interacting protein kinase 9	1	1	447	0	0	0
36	AT1G01140.2	CBL-interacting protein kinase 9	1	1	449	0	0	0
37	AT1G01140.3	CBL-interacting protein kinase 9	1	1	451	0	0	0
42	AT1G01160.2	GRF1-interacting factor 2	1	1	229	0	0	0
45	AT1G01180.1	S-adenosyl-L-methionine-dependent methyltransferases superfamily protein	1	2	307	0	0	0
46	AT1G01190.1	cytochrome P450%2C family 78%2C subfamily A%2C polypeptide 8	2	3	535	0	0	270
47	AT1G01190.2	cytochrome P450%2C family 78%2C subfamily A%2C polypeptide 8	2	3	540	0	0	275
52	AT1G01220.1	L-fucokinase/GDP-L-fucose pyrophosphorylase	1	1	1055	0	0	157
53	AT1G01220.2	L-fucokinase/GDP-L-fucose pyrophosphorylase	1	1	866	0	0	0
54	AT1G01220.3	L-fucokinase/GDP-L-fucose pyrophosphorylase	1	1	956	0	0	58
55	AT1G01220.4	L-fucokinase/GDP-L-fucose pyrophosphorylase	1	1	948	0	0	50
56	AT1G01220.5	L-fucokinase/GDP-L-fucose pyrophosphorylase	1	1	866	0	0	0
57	AT1G01220.6	L-fucokinase/GDP-L-fucose pyrophosphorylase	1	1	866	0	0	0
58	AT1G01220.7	L-fucokinase/GDP-L-fucose pyrophosphorylase	1	1	1055	0	0	157
59	AT1G01220.8	L-fucokinase/GDP-L-fucose pyrophosphorylase	1	1	956	0	0	58
60	AT1G01225.1	NC domain-containing protein-like protein	1	1	260	0	0	0
62	AT1G01240.1	transmembrane protein	1	1	331	0	0	0
63	AT1G01240.2	transmembrane protein	1	1	331	0	0	0
64	AT1G01240.3	transmembrane protein	1	1	331	0	0	0
65	AT1G01240.4	transmembrane protein	1	1	331	0	0	0
66	AT1G01240.5	transmembrane protein	1	1	331	0	0	0
68	AT1G01260.1	basic helix-loop-helix (bHLH) DNA-binding superfamily protein	2	2	590	0	0	65
69	AT1G01260.2	basic helix-loop-helix (bHLH) DNA-binding superfamily protein	2	2	590	0	0	65
70	AT1G01260.3	basic helix-loop-helix (bHLH) DNA-binding superfamily protein	2	2	590	0	0	65
71	AT1G01280.1	cytochrome P450%2C family 703%2C subfamily A%2C polypeptide 2	1	1	510	0	0	0
72	AT1G01290.1	cofactor of nitrate reductase and xanthine dehydrogenase 3	1	1	270	0	0	0
73	AT1G01290.2	cofactor of nitrate reductase and xanthine dehydrogenase 3	1	1	270	0	0	0
74	AT1G01300.1	Eukaryotic aspartyl protease family protein	1	1	485	0	0	107
76	AT1G01310.1	CAP (Cysteine-rich secretory proteins%2C Antigen 5%2C and Pathogenesis-related 1 protein) superfamily protein	1	1	241	0	0	20
77	AT1G01320.1	Tetratricopeptide repeat (TPR)-like superfamily protein	2	4	1797	0	0	74
78	AT1G01320.2	Tetratricopeptide repeat (TPR)-like superfamily protein	2	4	1787	0	0	74
79	AT1G01320.3	Tetratricopeptide repeat (TPR)-like superfamily protein	2	4	1789	0	0	74
81	AT1G01340.1	cyclic nucleotide gated channel 10	3	3	706	0	1	117
82	AT1G01340.2	cyclic nucleotide gated channel 10	3	3	711	0	1	122
8717	AT1G59660.1	Nucleoporin autopeptidase	26	52	997	0	1	37
8718	AT1G59660.2	Nucleoporin autopeptidase	26	52	990	0	1	37
98	AT1G01410.1	pumilio 22	1	1	361	0	0	119
99	AT1G01420.1	UDP-glucosyl transferase 72B3	4	4	481	0	0	76
100	AT1G01420.2	UDP-glucosyl transferase 72B3	4	4	484	0	0	79
101	AT1G01430.1	TRICHOME BIREFRINGENCE-LIKE 25	1	1	456	0	0	0
102	AT1G01440.1	hypothetical protein (DUF3133)	1	1	664	0	0	455
103	AT1G01450.1	Protein kinase superfamily protein	4	4	470	0	1	32
106	AT1G01460.1	Phosphatidylinositol-4-phosphate 5-kinase%2C core	1	1	427	0	0	133
108	AT1G01480.1	1-amino-cyclopropane-1-carboxylate synthase 2	1	1	496	0	0	109
109	AT1G01480.2	1-amino-cyclopropane-1-carboxylate synthase 2	1	1	390	0	0	3
114	AT1G01500.1	Erythronate-4-phosphate dehydrogenase family protein	1	1	327	0	0	0
116	AT1G01520.1	Homeodomain-like superfamily protein	1	1	287	0	0	0
117	AT1G01520.2	Homeodomain-like superfamily protein	1	1	258	0	0	0
118	AT1G01520.3	Homeodomain-like superfamily protein	1	1	287	0	0	0
119	AT1G01520.4	Homeodomain-like superfamily protein	1	1	258	0	0	0
120	AT1G01520.5	Homeodomain-like superfamily protein	1	1	203	0	0	0
121	AT1G01530.1	AGAMOUS-like 28	2	2	247	0	0	14
122	AT1G01540.1	Protein kinase superfamily protein	3	4	386	0	0	143
123	AT1G01540.2	Protein kinase superfamily protein	3	4	472	0	0	143
124	AT1G01550.1	BPS1-like protein (DUF793)	1	1	349	0	1	0
125	AT1G01550.2	BPS1-like protein (DUF793)	1	1	349	0	1	0
126	AT1G01560.1	MAP kinase 11	3	3	275	0	0	0
127	AT1G01560.2	MAP kinase 11	3	3	369	0	0	0
128	AT1G01560.3	MAP kinase 11	3	3	346	0	0	0
129	AT1G01560.4	MAP kinase 11	3	3	275	0	0	0
130	AT1G01570.1	transferring glycosyl group transferase (DUF604)	1	1	478	0	0	0
131	AT1G01570.2	transferring glycosyl group transferase (DUF604)	1	1	509	0	0	0
132	AT1G01580.1	ferric reduction oxidase 2	2	3	725	0	0	0
133	AT1G01580.2	ferric reduction oxidase 2	2	3	803	0	0	0
134	AT1G01590.1	ferric reduction oxidase 1	1	2	704	0	0	0
135	AT1G01600.1	cytochrome P450%2C family 86%2C subfamily A%2C polypeptide 4	1	1	554	0	0	0
136	AT1G01610.1	glycerol-3-phosphate acyltransferase 4	2	2	503	0	0	58
137	AT1G01620.1	plasma membrane intrinsic protein 1C	2	2	286	0	0	0
138	AT1G01620.2	plasma membrane intrinsic protein 1C	2	2	214	0	0	0
142	AT1G01650.1	SIGNAL PEPTIDE PEPTIDASE-LIKE 4	2	4	540	0	1	0
143	AT1G01650.2	SIGNAL PEPTIDE PEPTIDASE-LIKE 4	2	2	398	0	0	97
144	AT1G01650.3	SIGNAL PEPTIDE PEPTIDASE-LIKE 4	2	2	398	0	0	97
145	AT1G01650.4	SIGNAL PEPTIDE PEPTIDASE-LIKE 4	2	2	398	0	0	97
152	AT1G01690.1	putative recombination initiation defects 3	2	3	451	0	0	0
153	AT1G01690.2	putative recombination initiation defects 3	2	3	450	0	0	0
154	AT1G01690.3	putative recombination initiation defects 3	2	3	450	0	0	0
156	AT1G01700.1	RHO guanyl-nucleotide exchange factor 2	1	1	485	0	0	0
157	AT1G01700.2	RHO guanyl-nucleotide exchange factor 2	2	2	372	0	0	147
158	AT1G01700.3	RHO guanyl-nucleotide exchange factor 2	1	1	461	0	0	0
159	AT1G01700.4	RHO guanyl-nucleotide exchange factor 2	1	1	515	0	0	0
160	AT1G01700.5	RHO guanyl-nucleotide exchange factor 2	2	2	372	0	0	147
161	AT1G01710.1	acyl-CoA thioesterase II	3	3	427	0	0	0
164	AT1G01720.1	NAC (No Apical Meristem) domain transcriptional regulator superfamily protein	2	2	289	0	0	67
166	AT1G01730.1	hypothetical protein	1	1	224	0	0	0
167	AT1G01740.1	kinase with tetratricopeptide repeat domain-containing protein	2	2	483	0	0	36
168	AT1G01740.2	kinase with tetratricopeptide repeat domain-containing protein	2	2	483	0	0	36
169	AT1G01740.3	kinase with tetratricopeptide repeat domain-containing protein	2	2	405	0	0	0
170	AT1G01740.4	kinase with tetratricopeptide repeat domain-containing protein	2	2	405	0	0	0
171	AT1G01740.5	kinase with tetratricopeptide repeat domain-containing protein	2	2	475	0	0	36
178	AT1G01770.1	propionyl-CoA carboxylase	2	2	632	0	0	0
8719	AT1G59660.3	Nucleoporin autopeptidase	26	52	990	0	1	37
33679	AT4G22475.2	transmembrane protein	20	35	561	0	0	118
182	AT1G01800.1	NAD(P)-binding Rossmann-fold superfamily protein	1	1	295	0	0	0
185	AT1G01820.1	peroxin 11c	2	2	235	0	0	14
186	AT1G01830.1	ARM repeat superfamily protein	1	1	574	0	0	0
187	AT1G01830.2	ARM repeat superfamily protein	1	1	574	0	0	0
188	AT1G01830.3	ARM repeat superfamily protein	1	1	574	0	0	0
195	AT1G01880.1	5'-3' exonuclease family protein	2	3	599	0	1	0
196	AT1G01880.2	5'-3' exonuclease family protein	2	3	598	0	1	0
197	AT1G01880.3	5'-3' exonuclease family protein	2	3	599	0	1	0
198	AT1G01880.4	5'-3' exonuclease family protein	2	3	541	0	1	0
13693	AT2G08986.1	hypothetical protein	7	29	1218	0	0	310
200	AT1G01910.1	P-loop containing nucleoside triphosphate hydrolases superfamily protein	3	3	353	0	0	0
201	AT1G01910.2	P-loop containing nucleoside triphosphate hydrolases superfamily protein	3	3	353	0	0	0
202	AT1G01910.3	P-loop containing nucleoside triphosphate hydrolases superfamily protein	3	3	303	0	0	0
203	AT1G01910.4	P-loop containing nucleoside triphosphate hydrolases superfamily protein	3	3	353	0	0	0
204	AT1G01910.5	P-loop containing nucleoside triphosphate hydrolases superfamily protein	3	3	249	0	0	0
205	AT1G01920.1	SET domain-containing protein	2	2	572	0	0	0
206	AT1G01920.2	SET domain-containing protein	2	2	547	0	0	0
207	AT1G01920.3	SET domain-containing protein	2	2	434	0	0	0
208	AT1G01920.4	SET domain-containing protein	1	1	503	0	0	0
209	AT1G01920.5	SET domain-containing protein	2	2	517	0	0	0
210	AT1G01930.1	zinc finger protein-like protein	1	1	580	0	0	0
212	AT1G01950.1	armadillo repeat kinesin 2	2	2	894	0	0	196
213	AT1G01950.2	armadillo repeat kinesin 2	2	2	877	0	0	196
214	AT1G01950.3	armadillo repeat kinesin 2	2	2	915	0	0	196
215	AT1G01950.4	armadillo repeat kinesin 2	2	2	753	0	0	55
216	AT1G01960.1	SEC7-like guanine nucleotide exchange family protein	1	1	1750	0	0	68
217	AT1G01970.1	Tetratricopeptide repeat (TPR)-like superfamily protein	1	1	409	0	0	0
218	AT1G01980.1	FAD-binding Berberine family protein	1	2	541	0	0	43
219	AT1G01990.1	hypothetical protein	1	1	245	0	0	0
220	AT1G02000.1	UDP-D-glucuronate 4-epimerase 2	1	2	434	0	0	0
221	AT1G02010.1	secretory 1A	1	1	673	0	0	204
222	AT1G02010.2	secretory 1A	1	1	660	0	0	204
223	AT1G02010.3	secretory 1A	2	2	611	0	0	402
224	AT1G02010.4	secretory 1A	1	1	703	0	0	234
225	AT1G02010.5	secretory 1A	1	1	641	0	0	172
226	AT1G02010.6	secretory 1A	1	1	524	0	0	55
227	AT1G02020.1	nitroreductase family protein	1	1	642	0	0	82
228	AT1G02020.2	nitroreductase family protein	1	1	543	0	0	82
229	AT1G02020.3	nitroreductase family protein	1	1	448	0	0	82
232	AT1G02050.1	Chalcone and stilbene synthase family protein	2	2	395	0	0	179
19625	AT2G45000.1	structural constituent of nuclear pore	18	26	739	0	8	49
22111	AT3G10650.1	nuclear pore complex protein	12	26	1309	0	9	978
22112	AT3G10650.2	nuclear pore complex protein	12	26	1309	0	9	978
241	AT1G02090.1	Proteasome component (PCI) domain protein	1	1	260	0	0	36
244	AT1G02100.1	Leucine carboxyl methyltransferase	3	3	332	0	0	115
245	AT1G02100.2	Leucine carboxyl methyltransferase	1	1	306	0	0	20
246	AT1G02100.3	Leucine carboxyl methyltransferase	3	3	332	0	0	115
248	AT1G02120.1	GRAM domain family protein	2	3	598	0	0	145
249	AT1G02120.2	GRAM domain family protein	2	3	473	0	0	145
250	AT1G02120.3	GRAM domain family protein	2	3	419	0	0	145
253	AT1G02145.1	homolog of asparagine-linked glycosylation 12	1	2	493	0	0	0
254	AT1G02145.2	homolog of asparagine-linked glycosylation 12	2	2	332	0	0	38
255	AT1G02145.3	homolog of asparagine-linked glycosylation 12	1	2	497	0	0	0
256	AT1G02145.4	homolog of asparagine-linked glycosylation 12	1	2	453	0	0	0
261	AT1G02180.1	ferredoxin-like protein	1	1	226	0	0	0
270	AT1G02220.1	NAC domain containing protein 3	2	2	394	0	0	101
272	AT1G02250.1	NAC domain containing protein 5	1	2	362	0	0	0
273	AT1G02260.1	Divalent ion symporter	2	3	502	0	1	0
274	AT1G02260.2	Divalent ion symporter	2	3	502	0	1	0
275	AT1G02270.1	Calcium-binding endonuclease/exonuclease/phosphatase family	1	1	484	0	0	0
276	AT1G02270.2	Calcium-binding endonuclease/exonuclease/phosphatase family	1	1	349	0	0	0
277	AT1G02280.1	translocon at the outer envelope membrane of chloroplasts 33	2	2	297	0	0	0
278	AT1G02280.2	translocon at the outer envelope membrane of chloroplasts 33	2	2	297	0	0	0
279	AT1G02290.1	hypothetical protein	1	1	443	0	0	0
280	AT1G02300.1	Cysteine proteinases superfamily protein	2	2	379	0	0	0
281	AT1G02305.1	Cysteine proteinases superfamily protein	1	1	362	0	0	0
282	AT1G02310.1	Glycosyl hydrolase superfamily protein	1	1	411	0	0	121
283	AT1G02310.2	Glycosyl hydrolase superfamily protein	1	1	431	0	0	141
287	AT1G02340.1	basic helix-loop-helix (bHLH) DNA-binding superfamily protein	1	1	292	0	0	7
288	AT1G02340.2	basic helix-loop-helix (bHLH) DNA-binding superfamily protein	1	1	285	0	0	0
290	AT1G02360.1	Chitinase family protein	2	2	272	0	0	21
291	AT1G02360.2	Chitinase family protein	2	2	318	0	0	67
292	AT1G02360.3	Chitinase family protein	2	2	324	0	0	73
294	AT1G02380.1	transmembrane protein	1	1	231	0	0	0
295	AT1G02390.1	glycerol-3-phosphate acyltransferase 2	2	2	530	0	0	95
296	AT1G02400.1	gibberellin 2-oxidase 6	2	2	329	0	0	1
297	AT1G02400.2	gibberellin 2-oxidase 6	2	2	265	0	0	1
299	AT1G02410.1	cytochrome c oxidase assembly protein CtaG / Cox11 family	1	1	287	0	0	0
300	AT1G02410.2	cytochrome c oxidase assembly protein CtaG / Cox11 family	1	1	287	0	0	0
301	AT1G02410.3	cytochrome c oxidase assembly protein CtaG / Cox11 family	1	1	287	0	0	0
302	AT1G02420.1	Pentatricopeptide repeat (PPR) superfamily protein	1	1	491	0	0	218
308	AT1G02460.1	Pectin lyase-like superfamily protein	1	1	491	0	0	224
309	AT1G02470.1	Polyketide cyclase/dehydrase and lipid transport superfamily protein	1	1	220	0	0	0
310	AT1G02470.2	Polyketide cyclase/dehydrase and lipid transport superfamily protein	1	1	200	0	0	0
311	AT1G02475.1	Polyketide cyclase/dehydrase and lipid transport superfamily protein	1	1	219	0	0	0
313	AT1G02500.1	S-adenosylmethionine synthetase 1	2	3	393	0	0	0
314	AT1G02500.2	S-adenosylmethionine synthetase 1	2	3	393	0	0	0
315	AT1G02510.1	Outward rectifying potassium channel protein	1	1	284	0	0	0
33678	AT4G22475.1	transmembrane protein	20	24	441	0	0	118
8260	AT1G55540.1	Nuclear pore complex protein	10	21	1816	0	0	1476
8261	AT1G55540.2	Nuclear pore complex protein	10	21	1819	0	0	1479
6444	AT1G40104.1	hypothetical protein	7	19	618	0	0	0
24616	AT3G23450.1	transmembrane protein	10	19	452	0	0	231
321	AT1G02540.1	hypothetical protein	1	1	290	0	0	70
324	AT1G02570.1	transmembrane protein	3	3	278	0	0	0
325	AT1G02575.1	transmembrane protein	2	2	276	0	0	0
326	AT1G02580.1	SET domain-containing protein	2	2	689	0	0	284
327	AT1G02580.2	SET domain-containing protein	2	2	584	0	0	284
333	AT1G02630.1	Nucleoside transporter family protein	1	1	389	0	0	0
334	AT1G02630.2	Nucleoside transporter family protein	1	1	345	0	0	0
335	AT1G02640.1	beta-xylosidase 2	2	3	768	0	0	421
338	AT1G02660.1	alpha/beta-Hydrolases superfamily protein	1	1	713	0	0	0
339	AT1G02670.1	P-loop containing nucleoside triphosphate hydrolases superfamily protein	2	2	678	0	0	265
340	AT1G02670.2	P-loop containing nucleoside triphosphate hydrolases superfamily protein	2	2	643	0	0	277
341	AT1G02670.3	P-loop containing nucleoside triphosphate hydrolases superfamily protein	2	2	690	0	0	277
342	AT1G02670.4	P-loop containing nucleoside triphosphate hydrolases superfamily protein	2	2	528	0	0	277
343	AT1G02670.5	P-loop containing nucleoside triphosphate hydrolases superfamily protein	2	2	616	0	0	250
344	AT1G02670.6	P-loop containing nucleoside triphosphate hydrolases superfamily protein	2	2	663	0	0	250
345	AT1G02670.7	P-loop containing nucleoside triphosphate hydrolases superfamily protein	2	2	667	0	0	254
347	AT1G02690.1	importin alpha isoform 6	2	2	538	0	2	338
348	AT1G02690.2	importin alpha isoform 6	2	2	539	0	2	339
349	AT1G02700.1	GATA transcription factor-like protein	1	1	247	0	0	0
354	AT1G02730.1	cellulose synthase-like D5	2	3	1181	0	0	282
360	AT1G02790.1	polygalacturonase 4	2	3	422	0	0	0
361	AT1G02800.1	cellulase 2	2	2	501	0	0	0
362	AT1G02810.1	Plant invertase/pectin methylesterase inhibitor superfamily	1	1	579	0	1	220
24617	AT3G23450.2	transmembrane protein	10	19	442	0	0	221
24618	AT3G23450.3	transmembrane protein	11	19	432	0	0	211
374	AT1G02850.3	beta glucosidase 11	3	4	435	0	1	14
24619	AT3G23450.4	transmembrane protein	11	19	432	0	0	211
9456	AT1G63540.1	hydroxyproline-rich glycoprotein family protein	13	18	635	0	2	217
382	AT1G02880.2	thiamin pyrophosphokinase1	1	1	264	0	0	24
383	AT1G02880.3	thiamin pyrophosphokinase1	1	1	267	0	0	27
386	AT1G02880.6	thiamin pyrophosphokinase1	1	1	273	0	0	33
38392	AT5G07570.1	glycine/proline-rich protein	4	17	1504	0	1	415
388	AT1G02890.2	AAA-type ATPase family protein	2	4	1218	0	0	575
390	AT1G02910.1	tetratricopeptide repeat (TPR)-containing protein	1	1	453	0	0	150
391	AT1G02910.2	tetratricopeptide repeat (TPR)-containing protein	1	1	370	0	0	150
392	AT1G02920.1	glutathione S-transferase 7	2	2	209	0	0	0
393	AT1G02930.1	glutathione S-transferase 6	2	2	208	0	0	0
394	AT1G02930.2	glutathione S-transferase 6	2	2	208	0	0	0
395	AT1G02940.1	glutathione S-transferase (class phi) 5	1	1	256	0	0	0
396	AT1G02940.2	glutathione S-transferase (class phi) 5	1	1	281	0	0	0
397	AT1G02940.3	glutathione S-transferase (class phi) 5	1	1	269	0	0	0
398	AT1G02940.4	glutathione S-transferase (class phi) 5	1	1	256	0	0	0
399	AT1G02950.1	glutathione S-transferase F4	1	1	243	0	0	0
400	AT1G02950.2	glutathione S-transferase F4	1	1	245	0	0	0
401	AT1G02950.3	glutathione S-transferase F4	1	1	243	0	0	0
403	AT1G02950.5	glutathione S-transferase F4	1	1	255	0	0	0
404	AT1G02960.1	kinetochore protein	1	1	462	0	0	136
405	AT1G02960.2	kinetochore protein	1	1	471	0	0	136
406	AT1G02960.3	kinetochore protein	1	1	412	0	0	136
407	AT1G02960.4	kinetochore protein	1	1	387	0	0	136
408	AT1G02960.5	kinetochore protein	1	1	421	0	0	136
409	AT1G02960.6	kinetochore protein	1	1	387	0	0	136
411	AT1G02970.1	WEE1-like kinase	2	3	500	0	0	23
414	AT1G02990.1	hypothetical protein	1	2	1069	0	0	0
415	AT1G02990.2	hypothetical protein	1	2	1238	0	0	0
416	AT1G02990.3	hypothetical protein	2	3	1278	0	0	0
417	AT1G02990.4	hypothetical protein	2	3	1278	0	0	0
418	AT1G02990.5	hypothetical protein	2	3	1220	0	0	0
419	AT1G02990.6	hypothetical protein	2	3	1278	0	0	0
420	AT1G03000.1	peroxin 6	1	1	941	0	0	63
429	AT1G03040.3	basic helix-loop-helix (bHLH) DNA-binding superfamily protein	1	1	333	0	0	47
430	AT1G03050.1	ENTH/ANTH/VHS superfamily protein	1	1	599	0	0	306
431	AT1G03055.1	beta-carotene isomerase D27-like protein	1	1	264	0	0	34
432	AT1G03055.2	beta-carotene isomerase D27-like protein	1	1	200	0	0	0
41077	AT5G23110.1	Zinc finger%2C C3HC4 type (RING finger) family protein	4	17	4706	0	1	1723
10087	AT1G67120.1	midasin-like protein	3	15	5393	0	0	4328
10088	AT1G67120.2	midasin-like protein	3	15	5400	0	0	4335
38393	AT5G07570.2	glycine/proline-rich protein	4	15	1389	0	1	415
437	AT1G03070.1	Bax inhibitor-1 family protein	1	1	247	0	1	0
438	AT1G03070.2	Bax inhibitor-1 family protein	1	1	247	0	1	0
439	AT1G03070.3	Bax inhibitor-1 family protein	1	1	247	0	1	0
440	AT1G03080.1	kinase interacting (KIP1-like) family protein	2	4	1733	0	0	0
441	AT1G03080.2	kinase interacting (KIP1-like) family protein	2	4	1733	0	0	0
442	AT1G03080.3	kinase interacting (KIP1-like) family protein	2	4	1733	0	0	0
443	AT1G03090.1	methylcrotonyl-CoA carboxylase alpha chain	2	2	714	0	0	51
444	AT1G03090.2	methylcrotonyl-CoA carboxylase alpha chain	2	2	734	0	0	51
445	AT1G03100.1	Pentatricopeptide repeat (PPR) superfamily protein	2	2	793	0	0	145
448	AT1G03110.1	Transducin/WD40 repeat-like superfamily protein	1	1	427	0	0	0
452	AT1G03140.1	splicing factor Prp18 family protein	1	2	420	0	0	0
466	AT1G03190.1	RAD3-like DNA-binding helicase protein	1	1	758	0	0	0
467	AT1G03190.2	RAD3-like DNA-binding helicase protein	1	1	758	0	0	0
469	AT1G03210.1	Phenazine biosynthesis PhzC/PhzF protein	1	1	286	0	0	20
470	AT1G03210.2	Phenazine biosynthesis PhzC/PhzF protein	1	1	314	0	0	48
471	AT1G03220.1	Eukaryotic aspartyl protease family protein	4	4	433	0	0	212
472	AT1G03230.1	Eukaryotic aspartyl protease family protein	4	4	434	0	0	213
478	AT1G03260.1	SNARE associated Golgi protein family	2	2	274	0	0	0
479	AT1G03270.1	CBS domain protein with a domain protein (DUF21)	2	2	499	0	0	0
480	AT1G03280.1	Transcription factor TFIIE%2C alpha subunit	1	1	479	0	0	57
481	AT1G03280.2	Transcription factor TFIIE%2C alpha subunit	1	1	479	0	0	57
482	AT1G03280.3	Transcription factor TFIIE%2C alpha subunit	1	1	479	0	0	57
483	AT1G03290.1	ELKS/Rab6-interacting/CAST family protein	2	2	571	0	0	0
484	AT1G03290.2	ELKS/Rab6-interacting/CAST family protein	2	2	571	0	0	0
485	AT1G03290.3	ELKS/Rab6-interacting/CAST family protein	2	2	571	0	0	0
486	AT1G03290.4	ELKS/Rab6-interacting/CAST family protein	2	2	571	0	0	0
487	AT1G03290.5	ELKS/Rab6-interacting/CAST family protein	1	1	541	0	0	0
488	AT1G03290.6	ELKS/Rab6-interacting/CAST family protein	1	1	519	0	0	0
490	AT1G03310.1	debranching enzyme 1	1	1	882	0	0	529
491	AT1G03310.2	debranching enzyme 1	1	1	882	0	0	529
495	AT1G03340.1	hypothetical protein	1	1	385	0	0	185
496	AT1G03350.1	BSD domain-containing protein	3	3	470	0	0	0
498	AT1G03365.1	RING/U-box superfamily protein	1	1	823	0	0	65
499	AT1G03365.2	RING/U-box superfamily protein	1	1	823	0	0	65
38394	AT5G07570.3	glycine/proline-rich protein	4	14	1357	0	1	415
501	AT1G03370.2	C2 calcium/lipid-binding and GRAM domain containing protein	2	4	805	0	1	535
502	AT1G03380.1	yeast autophagy 18 G-like protein	1	3	959	0	0	0
503	AT1G03390.1	HXXXD-type acyl-transferase family protein	2	4	461	0	0	0
507	AT1G03410.1	2-oxoglutarate (2OG) and Fe(II)-dependent oxygenase superfamily protein	1	1	398	0	0	53
508	AT1G03410.2	2-oxoglutarate (2OG) and Fe(II)-dependent oxygenase superfamily protein	1	1	361	0	0	16
511	AT1G03440.1	Leucine-rich repeat (LRR) family protein	1	2	397	0	1	0
26739	AT3G47580.1	Leucine-rich repeat protein kinase family protein	7	13	1011	0	2	176
2845	AT1G14910.1	ENTH/ANTH/VHS superfamily protein	11	12	692	0	1	487
514	AT1G03457.1	RNA-binding (RRM/RBD/RNP motifs) family protein	3	3	429	0	0	174
515	AT1G03457.2	RNA-binding (RRM/RBD/RNP motifs) family protein	3	3	438	0	0	183
516	AT1G03457.3	RNA-binding (RRM/RBD/RNP motifs) family protein	3	3	324	0	0	69
517	AT1G03470.1	Kinase interacting (KIP1-like) family protein	1	1	269	0	0	52
518	AT1G03470.2	Kinase interacting (KIP1-like) family protein	1	1	269	0	0	52
519	AT1G03470.3	Kinase interacting (KIP1-like) family protein	1	1	269	0	0	52
520	AT1G03470.4	Kinase interacting (KIP1-like) family protein	1	1	269	0	0	52
521	AT1G03475.1	Coproporphyrinogen III oxidase	2	2	386	0	0	140
522	AT1G03490.1	NAC domain containing protein 6	1	1	281	0	0	0
523	AT1G03495.1	HXXXD-type acyl-transferase family protein	1	1	346	0	0	131
525	AT1G03520.1	Core-2/I-branching beta-1%2C6-N-acetylglucosaminyltransferase family protein	1	1	447	0	0	0
527	AT1G03530.1	nuclear assembly factor 1	2	3	801	0	0	590
528	AT1G03540.1	Pentatricopeptide repeat (PPR-like) superfamily protein	3	4	609	0	0	195
529	AT1G03550.1	Secretory carrier membrane protein (SCAMP) family protein	1	1	283	0	0	0
530	AT1G03550.2	Secretory carrier membrane protein (SCAMP) family protein	1	1	224	0	0	0
531	AT1G03550.3	Secretory carrier membrane protein (SCAMP) family protein	1	1	224	0	0	0
532	AT1G03550.4	Secretory carrier membrane protein (SCAMP) family protein	1	1	268	0	0	0
533	AT1G03550.5	Secretory carrier membrane protein (SCAMP) family protein	2	2	248	0	0	47
534	AT1G03550.6	Secretory carrier membrane protein (SCAMP) family protein	1	1	217	0	0	0
535	AT1G03550.7	Secretory carrier membrane protein (SCAMP) family protein	1	1	202	0	0	0
536	AT1G03560.1	Pentatricopeptide repeat (PPR-like) superfamily protein	2	2	660	0	0	109
537	AT1G03590.1	Protein phosphatase 2C family protein	1	1	462	0	0	75
539	AT1G03610.1	plant/protein (DUF789)	1	1	308	0	0	53
2846	AT1G14910.2	ENTH/ANTH/VHS superfamily protein	11	12	687	0	1	482
5495	AT1G30420.1	multidrug resistance-associated protein 12	4	12	1495	0	0	343
566	AT1G03720.1	Cysteine proteinases superfamily protein	1	1	274	0	0	55
567	AT1G03720.2	Cysteine proteinases superfamily protein	1	1	266	0	0	47
569	AT1G03740.1	Protein kinase superfamily protein	1	1	740	0	0	157
570	AT1G03740.2	Protein kinase superfamily protein	1	1	697	0	0	157
571	AT1G03750.1	switch 2	2	3	862	0	0	500
572	AT1G03760.1	Prefoldin chaperone subunit family protein	1	1	391	0	0	0
585	AT1G03820.1	E6-like protein	1	1	222	0	0	0
586	AT1G03830.1	guanylate-binding family protein	1	2	991	0	0	0
587	AT1G03830.2	guanylate-binding family protein	1	2	1013	0	0	0
588	AT1G03840.1	C2H2 and C2HC zinc fingers superfamily protein	3	3	506	0	1	231
589	AT1G03840.2	C2H2 and C2HC zinc fingers superfamily protein	3	3	504	0	1	229
593	AT1G03860.1	prohibitin 2	1	1	286	0	0	0
594	AT1G03860.2	prohibitin 2	1	1	221	0	0	0
595	AT1G03860.3	prohibitin 2	1	1	286	0	0	0
596	AT1G03870.1	FASCICLIN-like arabinoogalactan 9	2	2	247	0	0	35
597	AT1G03880.1	cruciferin 2	2	2	455	0	0	49
600	AT1G03905.1	P-loop containing nucleoside triphosphate hydrolases superfamily protein	1	1	290	0	0	0
601	AT1G03905.2	P-loop containing nucleoside triphosphate hydrolases superfamily protein	1	1	226	0	0	0
602	AT1G03905.3	P-loop containing nucleoside triphosphate hydrolases superfamily protein	1	1	226	0	0	0
603	AT1G03905.4	P-loop containing nucleoside triphosphate hydrolases superfamily protein	1	1	226	0	0	0
604	AT1G03910.1	cactus-binding carboxy-terminal%2C cactin	1	2	672	0	0	0
605	AT1G03910.2	cactus-binding carboxy-terminal%2C cactin	1	2	716	0	0	0
606	AT1G03920.1	Protein kinase family protein	2	2	569	0	0	80
607	AT1G03920.2	Protein kinase family protein	2	2	456	0	0	0
608	AT1G03920.3	Protein kinase family protein	2	2	569	0	0	80
609	AT1G03930.1	dual specificity kinase 1	2	2	471	0	0	0
610	AT1G03940.1	HXXXD-type acyl-transferase family protein	2	2	469	0	0	212
620	AT1G03980.1	phytochelatin synthase 2	1	1	367	0	0	0
621	AT1G03980.2	phytochelatin synthase 2	2	2	474	0	0	0
622	AT1G03980.3	phytochelatin synthase 2	2	2	452	0	0	0
623	AT1G03980.4	phytochelatin synthase 2	2	2	377	0	0	0
627	AT1G04010.1	phospholipid sterol acyl transferase 1	2	3	633	0	0	52
628	AT1G04020.1	breast cancer associated RING 1	1	1	713	0	0	411
629	AT1G04020.2	breast cancer associated RING 1	1	1	713	0	0	411
630	AT1G04030.1	eisosome protein	1	2	434	0	0	0
631	AT1G04030.2	eisosome protein	1	2	434	0	0	0
632	AT1G04040.1	HAD superfamily%2C subfamily IIIB acid phosphatase	2	2	271	0	0	0
637	AT1G04080.1	Tetratricopeptide repeat (TPR)-like superfamily protein	1	1	768	0	0	400
638	AT1G04080.2	Tetratricopeptide repeat (TPR)-like superfamily protein	1	1	582	0	0	214
639	AT1G04080.3	Tetratricopeptide repeat (TPR)-like superfamily protein	1	1	823	0	0	455
640	AT1G04080.4	Tetratricopeptide repeat (TPR)-like superfamily protein	1	1	768	0	0	400
641	AT1G04080.5	Tetratricopeptide repeat (TPR)-like superfamily protein	1	1	549	0	0	181
642	AT1G04090.1	vacuolar sorting-associated protein (DUF946)	1	1	572	0	0	0
645	AT1G04110.1	Subtilase family protein	2	3	775	0	0	0
9451	AT1G63530.1	hypothetical protein	8	12	499	0	1	38
9452	AT1G63530.2	hypothetical protein	8	12	499	0	1	38
9453	AT1G63530.3	hypothetical protein	8	12	522	0	1	38
651	AT1G04140.1	Transducin family protein / WD-40 repeat family protein	1	2	790	0	0	216
652	AT1G04140.2	Transducin family protein / WD-40 repeat family protein	1	2	793	0	0	216
653	AT1G04150.1	C2 calcium/lipid-binding plant phosphoribosyltransferase family protein	2	2	1012	0	0	363
9454	AT1G63530.4	hypothetical protein	8	12	522	0	1	38
13692	AT2G07981.1	hypothetical protein	7	12	413	0	0	194
658	AT1G04180.1	YUCCA 9	1	1	421	0	0	37
660	AT1G04200.1	dyggve-melchior-clausen syndrome protein	1	1	732	0	0	487
662	AT1G04200.3	dyggve-melchior-clausen syndrome protein	1	1	706	0	0	487
663	AT1G04210.1	Leucine-rich repeat protein kinase family protein	2	4	1112	0	0	487
664	AT1G04220.1	3-ketoacyl-CoA synthase 2	2	3	528	0	0	275
677	AT1G04300.1	TRAF-like superfamily protein	2	3	1074	0	0	850
678	AT1G04300.2	TRAF-like superfamily protein	2	3	997	0	0	773
679	AT1G04300.3	TRAF-like superfamily protein	2	3	1082	0	0	858
680	AT1G04300.4	TRAF-like superfamily protein	2	3	1055	0	0	831
681	AT1G04300.5	TRAF-like superfamily protein	2	3	1044	0	0	820
682	AT1G04300.6	TRAF-like superfamily protein	2	2	820	0	0	596
683	AT1G04310.1	ethylene response sensor 2	2	3	645	0	0	356
684	AT1G04310.2	ethylene response sensor 2	2	3	645	0	0	356
688	AT1G04360.1	RING/U-box superfamily protein	3	3	381	0	1	164
690	AT1G04380.1	2-oxoglutarate (2OG) and Fe(II)-dependent oxygenase superfamily protein	1	1	345	0	0	0
691	AT1G04380.2	2-oxoglutarate (2OG) and Fe(II)-dependent oxygenase superfamily protein	1	1	271	0	0	0
692	AT1G04390.1	BTB/POZ domain-containing protein	2	2	1002	0	0	458
693	AT1G04400.1	cryptochrome 2	1	1	612	0	0	54
694	AT1G04400.2	cryptochrome 2	1	1	612	0	0	54
696	AT1G04420.1	NAD(P)-linked oxidoreductase superfamily protein	2	2	412	0	0	0
697	AT1G04430.1	S-adenosyl-L-methionine-dependent methyltransferases superfamily protein	2	2	623	0	0	227
698	AT1G04430.2	S-adenosyl-L-methionine-dependent methyltransferases superfamily protein	2	2	623	0	0	227
699	AT1G04430.3	S-adenosyl-L-methionine-dependent methyltransferases superfamily protein	2	2	623	0	0	227
700	AT1G04440.1	casein kinase like 13	2	3	468	0	0	0
705	AT1G04470.1	hypothetical protein (DUF810)	3	4	1035	0	0	0
716	AT1G04500.1	CCT motif family protein	1	1	386	0	0	134
718	AT1G04500.3	CCT motif family protein	1	1	377	0	0	125
719	AT1G04500.4	CCT motif family protein	1	1	386	0	0	134
720	AT1G04510.1	MOS4-associated complex 3A	3	3	523	0	0	309
721	AT1G04510.2	MOS4-associated complex 3A	3	3	523	0	0	309
722	AT1G04520.1	plasmodesmata-located protein 2	2	2	307	0	0	0
724	AT1G04540.1	Calcium-dependent lipid-binding (CaLB domain) family protein	1	1	601	0	0	234
726	AT1G04550.2	AUX/IAA transcriptional regulator family protein	1	1	239	0	0	0
729	AT1G04570.1	Major facilitator superfamily protein	2	2	542	0	0	197
730	AT1G04570.2	Major facilitator superfamily protein	2	2	394	0	0	49
731	AT1G04580.1	aldehyde oxidase 4	3	4	1337	0	0	448
21369	AT3G06480.1	DEAD box RNA helicase family protein	10	12	1088	0	0	741
30747	AT4G05612.1	hypothetical protein	8	12	428	0	0	153
736	AT1G04620.1	coenzyme F420 hydrogenase family / dehydrogenase%2C beta subunit family	1	2	462	0	0	0
740	AT1G04640.1	lipoyltransferase 2	1	1	235	0	0	0
741	AT1G04640.2	lipoyltransferase 2	1	1	235	0	0	0
743	AT1G04650.1	holliday junction resolvase	1	1	997	0	0	638
744	AT1G04650.2	holliday junction resolvase	1	1	895	0	0	536
747	AT1G04680.1	Pectin lyase-like superfamily protein	4	4	431	0	0	101
748	AT1G04690.1	potassium channel beta subunit 1	2	2	328	0	0	0
30748	AT4G05612.2	hypothetical protein	8	12	387	0	0	112
32616	AT4G17140.1	pleckstrin homology (PH) domain-containing protein	2	12	4216	0	0	1455
32617	AT4G17140.2	pleckstrin homology (PH) domain-containing protein	2	12	4218	0	0	1445
752	AT1G04710.1	peroxisomal 3-ketoacyl-CoA thiolase 4	1	1	443	0	0	212
753	AT1G04730.1	P-loop containing nucleoside triphosphate hydrolases superfamily protein	2	2	943	0	0	106
754	AT1G04730.2	P-loop containing nucleoside triphosphate hydrolases superfamily protein	2	2	723	0	0	0
755	AT1G04730.3	P-loop containing nucleoside triphosphate hydrolases superfamily protein	2	2	723	0	0	0
756	AT1G04730.4	P-loop containing nucleoside triphosphate hydrolases superfamily protein	2	2	723	0	0	0
757	AT1G04750.1	vesicle-associated membrane protein 721	1	1	219	0	0	0
761	AT1G04760.1	vesicle-associated membrane protein 726	2	2	220	0	0	0
762	AT1G04760.2	vesicle-associated membrane protein 726	2	2	220	0	0	0
32618	AT4G17140.3	pleckstrin homology (PH) domain-containing protein	2	12	4219	0	0	1481
774	AT1G04850.1	ubiquitin-associated (UBA)/TS-N domain-containing protein	1	1	413	0	0	211
775	AT1G04850.2	ubiquitin-associated (UBA)/TS-N domain-containing protein	1	1	324	0	0	122
33723	AT4G22740.1	glycine-rich protein	11	12	356	0	0	0
777	AT1G04870.1	protein arginine methyltransferase 10	1	1	280	0	0	0
778	AT1G04870.2	protein arginine methyltransferase 10	1	1	383	0	0	89
782	AT1G04900.1	NADH dehydrogenase ubiquinone complex I%2C assembly factor-like protein (DUF185)	1	1	442	0	0	209
783	AT1G04910.1	O-fucosyltransferase family protein	2	2	519	0	0	253
784	AT1G04920.1	sucrose phosphate synthase 3F	2	3	1062	0	0	390
788	AT1G04940.1	translocon at the inner envelope membrane of chloroplasts 20	1	1	274	0	0	30
791	AT1G04945.3	HIT-type Zinc finger family protein	1	1	644	0	0	30
801	AT1G04980.1	PDI-like 2-2	1	1	447	0	0	47
804	AT1G04990.1	Zinc finger C-x8-C-x5-C-x3-H type family protein	2	2	404	0	0	125
805	AT1G04990.2	Zinc finger C-x8-C-x5-C-x3-H type family protein	2	2	404	0	0	125
806	AT1G04990.3	Zinc finger C-x8-C-x5-C-x3-H type family protein	2	2	323	0	0	44
807	AT1G04990.4	Zinc finger C-x8-C-x5-C-x3-H type family protein	2	2	303	0	0	24
808	AT1G04990.5	Zinc finger C-x8-C-x5-C-x3-H type family protein	2	2	384	0	0	105
809	AT1G04990.6	Zinc finger C-x8-C-x5-C-x3-H type family protein	2	2	404	0	0	125
810	AT1G05000.1	Phosphotyrosine protein phosphatases superfamily protein	1	1	215	0	1	0
811	AT1G05000.2	Phosphotyrosine protein phosphatases superfamily protein	1	1	247	0	1	0
814	AT1G05010.1	ethylene-forming enzyme	1	1	323	0	0	0
33724	AT4G22740.2	glycine-rich protein	11	12	356	0	0	0
816	AT1G05030.1	Major facilitator superfamily protein	2	3	524	0	1	0
817	AT1G05030.2	Major facilitator superfamily protein	1	2	472	0	0	0
821	AT1G05055.1	general transcription factor II H2	1	1	421	0	0	164
822	AT1G05060.1	coiled-coil protein	3	3	253	0	0	0
41402	AT5G24740.1	vacuolar protein sorting-associated protein%2C putative (DUF1162)	3	12	3464	0	0	900
830	AT1G05100.1	mitogen-activated protein kinase kinase kinase 18	1	1	339	0	0	0
831	AT1G05120.1	Helicase protein with RING/U-box domain-containing protein	1	2	833	0	0	0
832	AT1G05120.2	Helicase protein with RING/U-box domain-containing protein	1	2	876	0	0	33
834	AT1G05140.1	Peptidase M50 family protein	2	4	441	0	1	0
835	AT1G05150.1	Calcium-binding tetratricopeptide family protein	1	2	808	0	0	156
836	AT1G05160.1	cytochrome P450%2C family 88%2C subfamily A%2C polypeptide 3	2	3	490	0	0	0
837	AT1G05160.2	cytochrome P450%2C family 88%2C subfamily A%2C polypeptide 3	2	3	490	0	0	0
838	AT1G05170.1	Galactosyltransferase family protein	1	2	361	0	0	0
839	AT1G05170.2	Galactosyltransferase family protein	1	2	407	0	0	0
840	AT1G05180.1	NAD(P)-binding Rossmann-fold superfamily protein	1	2	540	0	0	0
841	AT1G05180.2	NAD(P)-binding Rossmann-fold superfamily protein	1	1	436	0	0	188
842	AT1G05180.3	NAD(P)-binding Rossmann-fold superfamily protein	1	1	422	0	0	188
844	AT1G05200.1	glutamate receptor 3.4	1	1	959	0	0	0
845	AT1G05200.2	glutamate receptor 3.4	1	1	959	0	0	0
846	AT1G05200.3	glutamate receptor 3.4	1	1	828	0	0	0
847	AT1G05200.4	glutamate receptor 3.4	1	1	675	0	0	0
848	AT1G05200.5	glutamate receptor 3.4	1	1	669	0	0	0
849	AT1G05200.6	glutamate receptor 3.4	1	1	959	0	0	0
850	AT1G05200.7	glutamate receptor 3.4	1	1	828	0	0	0
854	AT1G05230.1	homeodomain GLABROUS 2	1	1	721	0	0	251
855	AT1G05230.10	homeodomain GLABROUS 2	1	1	721	0	0	251
856	AT1G05230.11	homeodomain GLABROUS 2	1	1	721	0	0	251
857	AT1G05230.12	homeodomain GLABROUS 2	1	1	609	0	0	251
858	AT1G05230.2	homeodomain GLABROUS 2	1	1	721	0	0	251
859	AT1G05230.3	homeodomain GLABROUS 2	1	1	719	0	0	251
860	AT1G05230.4	homeodomain GLABROUS 2	1	1	721	0	0	251
861	AT1G05230.5	homeodomain GLABROUS 2	1	1	721	0	0	251
862	AT1G05230.6	homeodomain GLABROUS 2	1	1	721	0	0	251
863	AT1G05230.7	homeodomain GLABROUS 2	1	1	721	0	0	251
864	AT1G05230.8	homeodomain GLABROUS 2	1	1	721	0	0	251
865	AT1G05230.9	homeodomain GLABROUS 2	1	1	721	0	0	251
868	AT1G05260.1	Peroxidase superfamily protein	1	1	326	0	0	0
869	AT1G05270.1	TraB family protein	1	1	371	0	0	0
870	AT1G05280.1	ERV-F (C)1 provirus ancestral Env polyprotein%2C putative (DUF604)	4	4	491	0	0	18
871	AT1G05280.2	ERV-F (C)1 provirus ancestral Env polyprotein%2C putative (DUF604)	4	4	466	0	0	18
872	AT1G05290.1	CCT motif family protein	1	1	369	0	0	124
873	AT1G05291.1	GPI inositol-deacylase C%2C putative (DUF1218)	1	1	204	0	0	0
876	AT1G05310.1	Pectin lyase-like superfamily protein	3	4	393	0	1	20
888	AT1G05350.1	NAD(P)-binding Rossmann-fold superfamily protein	1	1	431	0	0	90
889	AT1G05360.1	vacuole membrane-like protein	2	3	416	0	0	0
890	AT1G05360.2	vacuole membrane-like protein	2	3	344	0	0	0
891	AT1G05360.3	vacuole membrane-like protein	2	3	344	0	0	0
892	AT1G05370.1	Sec14p-like phosphatidylinositol transfer family protein	1	1	417	0	0	112
893	AT1G05380.1	Acyl-CoA N-acyltransferase with RING/FYVE/PHD-type zinc finger protein	2	2	1138	0	0	695
894	AT1G05380.2	Acyl-CoA N-acyltransferase with RING/FYVE/PHD-type zinc finger protein	2	2	1138	0	0	695
895	AT1G05380.3	Acyl-CoA N-acyltransferase with RING/FYVE/PHD-type zinc finger protein	2	2	1138	0	0	695
900	AT1G05410.1	CDPK adapter%2C putative (DUF1423)	1	1	471	0	0	254
901	AT1G05410.2	CDPK adapter%2C putative (DUF1423)	1	1	444	0	0	227
904	AT1G05430.1	hypothetical protein	1	1	269	0	0	20
905	AT1G05440.1	C-8 sterol isomerase	1	1	393	0	0	103
907	AT1G05450.2	Bifunctional inhibitor/lipid-transfer protein/seed storage 2S albumin superfamily protein	1	1	205	0	0	0
910	AT1G05470.1	DNAse I-like superfamily protein	1	1	617	0	0	352
911	AT1G05470.2	DNAse I-like superfamily protein	1	1	617	0	0	352
912	AT1G05490.1	chromatin remodeling 31	1	1	1410	0	0	475
913	AT1G05500.1	Calcium-dependent lipid-binding (CaLB domain) family protein	1	2	560	0	0	0
914	AT1G05500.2	Calcium-dependent lipid-binding (CaLB domain) family protein	1	2	416	0	0	0
915	AT1G05510.1	naphthalene 1%2C2-dioxygenase subunit alpha (DUF1264)	1	1	241	0	0	0
41403	AT5G24740.2	vacuolar protein sorting-associated protein%2C putative (DUF1162)	3	12	3484	0	0	938
917	AT1G05530.1	UDP-glucosyl transferase 75B2	1	1	455	0	0	69
920	AT1G05550.1	hypothetical protein (DUF295)	1	1	236	0	1	0
922	AT1G05550.3	hypothetical protein (DUF295)	1	1	385	0	0	152
923	AT1G05550.4	hypothetical protein (DUF295)	1	1	236	0	1	0
924	AT1G05560.1	UDP-glucosyltransferase 75B1	1	1	469	0	0	66
925	AT1G05560.2	UDP-glucosyltransferase 75B1	1	1	519	0	0	116
926	AT1G05570.1	callose synthase 1	1	4	1950	0	0	42
927	AT1G05570.2	callose synthase 1	1	3	1909	0	0	42
928	AT1G05570.3	callose synthase 1	1	4	1950	0	0	42
929	AT1G05570.4	callose synthase 1	1	4	1950	0	0	42
931	AT1G05577.1	UPSTREAM OF FLC protein (DUF966)	1	1	372	0	0	55
932	AT1G05580.1	cation/H+ exchanger 23	2	3	867	0	1	113
933	AT1G05580.2	cation/H+ exchanger 23	2	2	756	0	1	2
934	AT1G05590.1	beta-hexosaminidase 2	1	1	580	0	0	0
935	AT1G05590.2	beta-hexosaminidase 2	1	1	580	0	0	0
936	AT1G05590.3	beta-hexosaminidase 2	1	1	580	0	0	0
940	AT1G05610.1	ADP-glucose pyrophosphorylase small subunit 2	4	4	476	0	1	14
941	AT1G05610.2	ADP-glucose pyrophosphorylase small subunit 2	4	4	482	0	1	14
943	AT1G05620.1	uridine-ribohydrolase 2	2	2	322	0	0	0
944	AT1G05620.2	uridine-ribohydrolase 2	2	2	302	0	0	0
41404	AT5G24740.3	vacuolar protein sorting-associated protein%2C putative (DUF1162)	3	12	3521	0	0	938
41405	AT5G24740.4	vacuolar protein sorting-associated protein%2C putative (DUF1162)	3	12	3446	0	0	938
947	AT1G05630.3	Endonuclease/exonuclease/phosphatase family protein	3	4	919	0	0	596
949	AT1G05650.1	Pectin lyase-like superfamily protein	3	3	394	0	0	0
950	AT1G05660.1	Pectin lyase-like superfamily protein	3	3	394	0	0	0
951	AT1G05670.1	Pentatricopeptide repeat (PPR-like) superfamily protein	2	2	741	0	0	95
952	AT1G05670.2	Pentatricopeptide repeat (PPR-like) superfamily protein	2	2	741	0	0	95
953	AT1G05670.3	Pentatricopeptide repeat (PPR-like) superfamily protein	2	2	741	0	0	95
954	AT1G05675.1	UDP-Glycosyltransferase superfamily protein	2	2	453	0	0	78
955	AT1G05680.1	Uridine diphosphate glycosyltransferase 74E2	1	1	453	0	0	78
41406	AT5G24740.5	vacuolar protein sorting-associated protein%2C putative (DUF1162)	3	12	3446	0	0	900
41407	AT5G24740.6	vacuolar protein sorting-associated protein%2C putative (DUF1162)	3	12	3303	0	0	757
977	AT1G05750.1	Tetratricopeptide repeat (TPR)-like superfamily protein	1	1	500	0	0	25
978	AT1G05750.2	Tetratricopeptide repeat (TPR)-like superfamily protein	1	1	500	0	0	25
995	AT1G05800.1	alpha/beta-Hydrolases superfamily protein	2	2	471	0	0	225
996	AT1G05805.1	basic helix-loop-helix (bHLH) DNA-binding superfamily protein	1	1	362	0	0	21
999	AT1G05820.1	SIGNAL PEPTIDE PEPTIDASE-LIKE 5	3	4	536	0	0	270
1000	AT1G05820.2	SIGNAL PEPTIDE PEPTIDASE-LIKE 5	3	4	507	0	0	270
1001	AT1G05820.3	SIGNAL PEPTIDE PEPTIDASE-LIKE 5	1	2	421	0	0	0
1002	AT1G05820.4	SIGNAL PEPTIDE PEPTIDASE-LIKE 5	3	3	396	0	0	130
42864	AT5G39770.1	Restriction endonuclease%2C type II-like superfamily protein	5	12	1272	0	0	0
5489	AT1G30410.1	multidrug resistance-associated protein 13	3	11	1498	0	0	0
5490	AT1G30410.2	multidrug resistance-associated protein 13	3	11	1495	0	0	0
5491	AT1G30410.3	multidrug resistance-associated protein 13	3	11	1365	0	0	0
1008	AT1G05840.1	Eukaryotic aspartyl protease family protein	2	2	485	0	0	28
1009	AT1G05850.1	Chitinase family protein	2	2	321	0	0	55
1010	AT1G05850.2	Chitinase family protein	2	2	321	0	0	55
1029	AT1G05890.1	RING/U-box superfamily protein	2	2	552	0	1	0
1030	AT1G05890.2	RING/U-box superfamily protein	4	4	594	0	2	0
1031	AT1G05894.1	hypothetical protein	1	1	457	0	0	0
1033	AT1G05900.2	endonuclease III 2	1	1	386	0	0	143
1034	AT1G05910.1	cell division cycle protein 48-related / CDC48-like protein	1	2	1210	0	0	123
1037	AT1G05940.1	cationic amino acid transporter 9	1	1	569	0	0	260
1038	AT1G05940.2	cationic amino acid transporter 9	1	1	451	0	0	142
1039	AT1G05940.3	cationic amino acid transporter 9	1	1	529	0	0	260
1040	AT1G05940.4	cationic amino acid transporter 9	1	1	500	0	0	260
1046	AT1G05960.1	ARM repeat superfamily protein	1	1	982	0	0	485
1047	AT1G05960.2	ARM repeat superfamily protein	1	1	1003	0	0	506
1048	AT1G05960.3	ARM repeat superfamily protein	1	1	982	0	0	485
1049	AT1G05960.4	ARM repeat superfamily protein	1	1	982	0	0	485
1051	AT1G05970.2	RNA-binding (RRM/RBD/RNP motifs) family protein	1	1	200	0	0	0
1053	AT1G06000.1	UDP-Glycosyltransferase superfamily protein	1	1	435	0	0	49
1055	AT1G06020.1	pfkB-like carbohydrate kinase family protein	2	2	345	0	0	0
1056	AT1G06030.1	pfkB-like carbohydrate kinase family protein	2	2	329	0	0	0
1057	AT1G06040.1	B-box zinc finger family protein	1	1	248	0	0	0
1060	AT1G06050.1	ENHANCED DISEASE RESISTANCE-like protein (DUF1336)	1	1	313	0	0	14
1061	AT1G06060.1	LisH and RanBPM domains containing protein	2	2	213	0	0	0
1062	AT1G06060.2	LisH and RanBPM domains containing protein	2	2	211	0	0	0
1063	AT1G06070.1	Basic-leucine zipper (bZIP) transcription factor family protein	1	1	423	0	0	121
1064	AT1G06080.1	delta 9 desaturase 1	3	3	305	0	1	48
1065	AT1G06080.2	delta 9 desaturase 1	2	2	227	0	0	0
1066	AT1G06090.1	Fatty acid desaturase family protein	1	1	299	0	0	0
1067	AT1G06100.1	Fatty acid desaturase family protein	2	2	299	0	1	1
1076	AT1G06140.1	Pentatricopeptide repeat (PPR) superfamily protein	1	1	558	0	0	189
1077	AT1G06143.1	basic helix loop helix DNA-binding superfamily protein	3	3	577	0	1	0
1080	AT1G06150.1	basic helix loop helix (bHLH) DNA-binding superfamily protein	1	2	734	0	0	53
1081	AT1G06150.2	basic helix loop helix (bHLH) DNA-binding superfamily protein	1	2	736	0	0	53
1083	AT1G06170.1	basic helix-loop-helix (bHLH) DNA-binding superfamily protein	1	1	420	0	0	33
1084	AT1G06170.2	basic helix-loop-helix (bHLH) DNA-binding superfamily protein	1	1	420	0	0	33
1091	AT1G06200.1	Peptidase S24/S26A/S26B/S26C family protein	2	2	206	0	0	0
1092	AT1G06200.2	Peptidase S24/S26A/S26B/S26C family protein	2	2	243	0	0	0
1093	AT1G06210.1	ENTH/VHS/GAT family protein	1	1	383	0	0	21
1094	AT1G06210.2	ENTH/VHS/GAT family protein	1	1	279	0	0	21
5492	AT1G30410.4	multidrug resistance-associated protein 13	3	11	1495	0	0	0
5494	AT1G30410.6	multidrug resistance-associated protein 13	3	11	1495	0	0	0
19718	AT2G45540.1	WD-40 repeat family protein / beige-like protein	3	11	2946	0	1	2295
1099	AT1G06230.1	global transcription factor group E4	1	1	766	0	0	216
1100	AT1G06230.2	global transcription factor group E4	1	1	766	0	0	216
1101	AT1G06230.3	global transcription factor group E4	1	1	766	0	0	216
1102	AT1G06230.4	global transcription factor group E4	1	1	766	0	0	216
1103	AT1G06240.1	diiron containing four-helix bundle family ferritin protein%2C putative (Protein of unknown function DUF455)	1	1	383	0	0	66
1104	AT1G06250.1	alpha/beta-Hydrolases superfamily protein	1	1	423	0	1	61
1105	AT1G06250.2	alpha/beta-Hydrolases superfamily protein	1	1	309	0	1	0
1106	AT1G06260.1	Cysteine proteinases superfamily protein	1	1	343	0	0	0
1108	AT1G06280.1	LOB domain-containing protein 2	1	1	206	0	0	0
1109	AT1G06290.1	acyl-CoA oxidase 3	2	3	675	0	0	126
1110	AT1G06310.1	acyl-CoA oxidase 6	2	3	675	0	0	126
1114	AT1G06350.1	Fatty acid desaturase family protein	1	1	300	0	0	0
1115	AT1G06360.1	Fatty acid desaturase family protein	1	1	299	0	0	0
1116	AT1G06360.2	Fatty acid desaturase family protein	1	1	315	0	0	0
1118	AT1G06390.1	GSK3/SHAGGY-like protein kinase 1	3	3	407	0	0	44
1119	AT1G06390.2	GSK3/SHAGGY-like protein kinase 1	3	3	407	0	0	44
1121	AT1G06410.1	trehalose-phosphatase/synthase 7	3	4	851	0	0	514
1122	AT1G06410.2	trehalose-phosphatase/synthase 7	3	4	851	0	0	514
1123	AT1G06410.3	trehalose-phosphatase/synthase 7	3	4	851	0	0	514
1126	AT1G06430.1	FTSH protease 8	2	2	685	0	0	375
1127	AT1G06430.2	FTSH protease 8	2	2	685	0	0	375
1128	AT1G06430.3	FTSH protease 8	2	2	685	0	0	375
1129	AT1G06440.1	Ubiquitin carboxyl-terminal hydrolase family protein	1	1	390	0	0	115
1130	AT1G06450.1	Polynucleotidyl transferase%2C ribonuclease H-like superfamily protein	3	3	360	0	0	0
1132	AT1G06470.1	Nucleotide/sugar transporter family protein	3	4	414	0	0	108
1133	AT1G06470.2	Nucleotide/sugar transporter family protein	3	4	414	0	0	108
1134	AT1G06470.3	Nucleotide/sugar transporter family protein	3	4	414	0	0	108
1135	AT1G06470.4	Nucleotide/sugar transporter family protein	3	4	414	0	0	108
19719	AT2G45540.2	WD-40 repeat family protein / beige-like protein	3	11	3001	0	1	2350
19720	AT2G45540.3	WD-40 repeat family protein / beige-like protein	3	11	2946	0	1	2295
1149	AT1G06550.1	ATP-dependent caseinolytic (Clp) protease/crotonase family protein	1	1	387	0	0	0
1151	AT1G06570.1	4-hydroxyphenylpyruvate dioxygenase	1	1	445	0	0	220
1153	AT1G06580.1	Pentatricopeptide repeat (PPR) superfamily protein	1	1	500	0	0	0
1154	AT1G06580.2	Pentatricopeptide repeat (PPR) superfamily protein	1	1	394	0	0	0
1155	AT1G06580.3	Pentatricopeptide repeat (PPR) superfamily protein	1	1	394	0	0	0
1156	AT1G06590.1	anaphase-promoting complex subunit	2	4	916	0	1	293
1159	AT1G06630.1	F-box/RNI-like superfamily protein	2	2	477	0	0	126
1160	AT1G06630.2	F-box/RNI-like superfamily protein	2	2	403	0	0	126
1161	AT1G06630.3	F-box/RNI-like superfamily protein	2	2	403	0	0	126
1162	AT1G06630.4	F-box/RNI-like superfamily protein	2	2	403	0	0	126
1163	AT1G06630.5	F-box/RNI-like superfamily protein	2	2	356	0	0	126
1164	AT1G06630.6	F-box/RNI-like superfamily protein	2	2	403	0	0	126
1165	AT1G06630.7	F-box/RNI-like superfamily protein	1	1	304	0	0	0
1166	AT1G06630.8	F-box/RNI-like superfamily protein	2	2	356	0	0	126
1167	AT1G06630.9	F-box/RNI-like superfamily protein	2	2	412	0	0	135
1168	AT1G06640.1	2-oxoglutarate (2OG) and Fe(II)-dependent oxygenase superfamily protein	2	2	369	0	0	37
1169	AT1G06640.2	2-oxoglutarate (2OG) and Fe(II)-dependent oxygenase superfamily protein	2	2	322	0	0	37
1170	AT1G06640.3	2-oxoglutarate (2OG) and Fe(II)-dependent oxygenase superfamily protein	2	2	286	0	0	37
1172	AT1G06650.1	2-oxoglutarate (2OG) and Fe(II)-dependent oxygenase superfamily protein	1	1	314	0	0	87
1175	AT1G06670.1	nuclear DEIH-boxhelicase	1	3	1576	0	0	188
1176	AT1G06670.2	nuclear DEIH-boxhelicase	1	3	1548	0	0	188
1177	AT1G06680.1	photosystem II subunit P-1	2	2	263	0	0	0
1178	AT1G06680.2	photosystem II subunit P-1	2	2	219	0	0	0
1179	AT1G06690.1	NAD(P)-linked oxidoreductase superfamily protein	1	1	377	0	0	0
1180	AT1G06700.1	Protein kinase superfamily protein	3	3	361	0	0	64
1181	AT1G06700.2	Protein kinase superfamily protein	3	3	361	0	0	64
1182	AT1G06700.3	Protein kinase superfamily protein	3	3	361	0	0	64
1183	AT1G06710.1	Tetratricopeptide repeat (TPR)-like superfamily protein	3	4	997	0	0	0
1184	AT1G06710.10	Tetratricopeptide repeat (TPR)-like superfamily protein	3	4	987	0	0	0
1185	AT1G06710.11	Tetratricopeptide repeat (TPR)-like superfamily protein	3	4	987	0	0	0
1186	AT1G06710.12	Tetratricopeptide repeat (TPR)-like superfamily protein	3	4	997	0	0	0
1187	AT1G06710.13	Tetratricopeptide repeat (TPR)-like superfamily protein	3	4	997	0	0	0
1188	AT1G06710.14	Tetratricopeptide repeat (TPR)-like superfamily protein	3	4	987	0	0	0
1189	AT1G06710.15	Tetratricopeptide repeat (TPR)-like superfamily protein	3	4	987	0	0	0
1190	AT1G06710.16	Tetratricopeptide repeat (TPR)-like superfamily protein	3	4	987	0	0	0
1191	AT1G06710.17	Tetratricopeptide repeat (TPR)-like superfamily protein	3	4	987	0	0	0
1192	AT1G06710.18	Tetratricopeptide repeat (TPR)-like superfamily protein	3	4	987	0	0	0
1193	AT1G06710.19	Tetratricopeptide repeat (TPR)-like superfamily protein	3	4	997	0	0	0
1194	AT1G06710.2	Tetratricopeptide repeat (TPR)-like superfamily protein	3	4	997	0	0	0
1195	AT1G06710.3	Tetratricopeptide repeat (TPR)-like superfamily protein	3	4	997	0	0	0
1196	AT1G06710.4	Tetratricopeptide repeat (TPR)-like superfamily protein	3	4	997	0	0	0
1197	AT1G06710.5	Tetratricopeptide repeat (TPR)-like superfamily protein	3	4	997	0	0	0
1198	AT1G06710.6	Tetratricopeptide repeat (TPR)-like superfamily protein	3	4	997	0	0	0
1199	AT1G06710.7	Tetratricopeptide repeat (TPR)-like superfamily protein	3	4	997	0	0	0
1200	AT1G06710.8	Tetratricopeptide repeat (TPR)-like superfamily protein	3	4	997	0	0	0
1201	AT1G06710.9	Tetratricopeptide repeat (TPR)-like superfamily protein	3	4	997	0	0	0
19721	AT2G45540.4	WD-40 repeat family protein / beige-like protein	3	11	2946	0	1	2295
19722	AT2G45540.5	WD-40 repeat family protein / beige-like protein	3	11	2946	0	1	2295
1204	AT1G06720.3	P-loop containing nucleoside triphosphate hydrolases superfamily protein	2	4	932	0	0	211
1205	AT1G06730.1	pfkB-like carbohydrate kinase family protein	1	1	488	0	0	0
1206	AT1G06740.1	MuDR family transposase	1	1	726	0	0	313
1214	AT1G06780.1	galacturonosyltransferase 6	1	1	589	0	0	274
1215	AT1G06780.2	galacturonosyltransferase 6	1	1	602	0	0	287
1221	AT1G06820.1	carotenoid isomerase	2	3	595	0	0	29
1222	AT1G06820.2	carotenoid isomerase	2	3	521	0	0	29
1223	AT1G06820.3	carotenoid isomerase	2	3	586	0	0	29
1224	AT1G06820.4	carotenoid isomerase	2	2	476	0	0	47
1226	AT1G06840.1	Leucine-rich repeat protein kinase family protein	2	3	953	0	0	331
1228	AT1G06850.2	basic leucine-zipper 52	1	1	231	0	0	3
1230	AT1G06890.1	nodulin MtN21 /EamA-like transporter family protein	2	2	357	0	0	67
1231	AT1G06890.2	nodulin MtN21 /EamA-like transporter family protein	2	2	357	0	0	67
1232	AT1G06890.3	nodulin MtN21 /EamA-like transporter family protein	2	2	353	0	0	67
1233	AT1G06890.4	nodulin MtN21 /EamA-like transporter family protein	2	2	352	0	0	67
1234	AT1G06900.1	Insulinase (Peptidase family M16) family protein	2	3	1024	0	0	197
1240	AT1G06950.1	translocon at the inner envelope membrane of chloroplasts 110	2	3	1016	0	0	73
1241	AT1G06960.1	RNA-binding (RRM/RBD/RNP motifs) family protein	1	1	229	0	0	0
1243	AT1G06960.3	RNA-binding (RRM/RBD/RNP motifs) family protein	1	1	200	0	0	0
1247	AT1G06970.1	cation/hydrogen exchanger 14	1	2	829	0	0	0
1249	AT1G06990.1	GDSL-like Lipase/Acylhydrolase superfamily protein	1	1	360	0	0	0
1250	AT1G07000.1	exocyst subunit exo70 family protein B2	1	1	599	0	0	0
1253	AT1G07010.3	Calcineurin-like metallo-phosphoesterase superfamily protein	2	2	400	0	1	0
1257	AT1G07040.1	plant/protein	1	1	371	0	0	0
1260	AT1G07060.1	hypothetical protein	1	1	233	0	0	0
1261	AT1G07060.2	hypothetical protein	1	1	277	0	0	0
1262	AT1G07060.3	hypothetical protein	1	1	273	0	0	0
1267	AT1G07110.1	fructose-2%2C6-bisphosphatase	1	1	744	0	0	65
1273	AT1G07150.1	mitogen-activated protein kinase kinase kinase 13	2	2	499	0	0	0
1274	AT1G07150.2	mitogen-activated protein kinase kinase kinase 13	2	2	493	0	0	0
1275	AT1G07160.1	Protein phosphatase 2C family protein	2	2	380	0	0	0
1284	AT1G07180.1	alternative NAD(P)H dehydrogenase 1	1	2	510	0	1	0
19723	AT2G45540.6	WD-40 repeat family protein / beige-like protein	3	11	2946	0	1	2295
24420	AT3G22330.1	putative mitochondrial RNA helicase 2	9	11	616	0	1	408
1288	AT1G07210.1	Ribosomal protein S18	3	3	261	0	1	35
1289	AT1G07220.1	O-glucosyltransferase rumi-like protein (DUF821)	1	1	507	0	0	50
1290	AT1G07230.1	non-specific phospholipase C1	3	4	533	0	1	17
1291	AT1G07240.1	UDP-glucosyl transferase 71C5	2	3	480	0	0	0
1292	AT1G07250.1	UDP-glucosyl transferase 71C4	2	2	479	0	0	180
1293	AT1G07260.1	UDP-glucosyl transferase 71C3	2	2	476	0	0	179
1296	AT1G07280.1	Tetratricopeptide repeat (TPR)-like superfamily protein	1	1	552	0	0	0
1297	AT1G07280.2	Tetratricopeptide repeat (TPR)-like superfamily protein	1	1	552	0	0	0
1298	AT1G07280.3	Tetratricopeptide repeat (TPR)-like superfamily protein	1	1	552	0	0	0
1299	AT1G07280.4	Tetratricopeptide repeat (TPR)-like superfamily protein	1	1	495	0	0	0
1300	AT1G07290.1	golgi nucleotide sugar transporter 2	2	2	354	0	0	141
1304	AT1G07310.1	Calcium-dependent lipid-binding (CaLB domain) family protein	1	1	352	0	0	137
1305	AT1G07320.1	ribosomal protein L4	2	2	282	0	0	0
1306	AT1G07320.2	ribosomal protein L4	2	2	280	0	0	0
1307	AT1G07320.3	ribosomal protein L4	2	2	278	0	0	0
1308	AT1G07320.4	ribosomal protein L4	2	2	278	0	0	0
1309	AT1G07330.1	dentin sialophosphoprotein	2	3	685	0	0	216
1310	AT1G07330.2	dentin sialophosphoprotein	2	3	753	0	0	284
26847	AT3G48190.2	Serine/Threonine-kinase ATM-like protein	3	11	3013	0	0	872
1312	AT1G07350.1	RNA-binding (RRM/RBD/RNP motifs) family protein	1	1	382	0	0	0
1315	AT1G07350.4	RNA-binding (RRM/RBD/RNP motifs) family protein	1	1	233	0	0	0
1317	AT1G07350.6	RNA-binding (RRM/RBD/RNP motifs) family protein	1	1	203	0	0	0
1318	AT1G07360.1	CCCH-type zinc fingerfamily protein with RNA-binding domain-containing protein	1	1	481	0	0	0
1320	AT1G07380.1	Neutral/alkaline non-lysosomal ceramidase	3	3	779	0	0	564
1321	AT1G07380.2	Neutral/alkaline non-lysosomal ceramidase	3	3	780	0	0	565
1322	AT1G07390.1	receptor like protein 1	1	2	1034	0	0	0
1323	AT1G07390.2	receptor like protein 1	1	1	913	0	0	448
1324	AT1G07390.3	receptor like protein 1	1	2	1083	0	0	0
1325	AT1G07390.4	receptor like protein 1	1	2	1077	0	0	0
1326	AT1G07390.5	receptor like protein 1	1	2	1048	0	0	0
1329	AT1G07420.1	sterol 4-alpha-methyl-oxidase 2-1	2	2	266	0	0	46
1330	AT1G07420.2	sterol 4-alpha-methyl-oxidase 2-1	2	2	228	0	0	8
1331	AT1G07430.1	highly ABA-induced PP2C protein 2	1	1	442	0	0	0
1332	AT1G07440.1	NAD(P)-binding Rossmann-fold superfamily protein	3	3	266	0	0	24
1334	AT1G07450.1	NAD(P)-binding Rossmann-fold superfamily protein	2	2	260	0	0	0
1347	AT1G07510.1	FTSH protease 10	2	2	813	0	0	262
26848	AT3G48190.3	Serine/Threonine-kinase ATM-like protein	3	11	2989	0	0	848
1349	AT1G07520.2	GRAS family transcription factor	3	4	531	0	0	226
27225	AT3G50370.1	hypothetical protein	4	11	2156	0	2	555
1351	AT1G07520.4	GRAS family transcription factor	3	4	531	0	0	226
1352	AT1G07530.1	SCARECROW-like 14	1	2	769	0	0	20
1353	AT1G07540.1	TRF-like 2	1	1	630	0	1	0
1354	AT1G07550.1	Leucine-rich repeat protein kinase family protein	4	4	864	0	0	547
27226	AT3G50370.2	hypothetical protein	4	11	2160	0	2	559
1356	AT1G07570.1	Protein kinase superfamily protein	3	3	410	0	0	67
1357	AT1G07570.2	Protein kinase superfamily protein	3	3	410	0	0	67
1358	AT1G07570.3	Protein kinase superfamily protein	3	3	421	0	0	78
1359	AT1G07570.4	Protein kinase superfamily protein	2	2	294	0	0	0
1360	AT1G07570.5	Protein kinase superfamily protein	3	3	410	0	0	67
1365	AT1G07620.1	GTP-binding protein Obg/CgtA	1	1	552	0	0	119
1366	AT1G07620.2	GTP-binding protein Obg/CgtA	1	1	578	0	0	119
1367	AT1G07620.3	GTP-binding protein Obg/CgtA	1	1	552	0	0	119
1368	AT1G07620.4	GTP-binding protein Obg/CgtA	1	1	552	0	0	119
1369	AT1G07630.1	pol-like 5	1	1	662	0	0	330
48169	ATCG00340.1	Photosystem I%2C PsaA/PsaB protein	4	11	734	1	1	0
3923	AT1G20760.1	Calcium-binding EF hand family protein	7	10	1019	0	0	796
5493	AT1G30410.5	multidrug resistance-associated protein 13	3	10	1380	0	0	0
17609	AT2G34660.1	multidrug resistance-associated protein 2	3	10	1623	0	0	0
1380	AT1G07670.1	endomembrane-type CA-ATPase 4	2	4	1061	0	0	811
1381	AT1G07670.2	endomembrane-type CA-ATPase 4	2	4	1061	0	0	811
1392	AT1G07705.1	NOT2 / NOT3 / NOT5 family	2	2	546	0	0	285
1393	AT1G07705.2	NOT2 / NOT3 / NOT5 family	2	2	614	0	0	285
1396	AT1G07720.1	3-ketoacyl-CoA synthase 3	2	2	478	0	0	213
1397	AT1G07720.2	3-ketoacyl-CoA synthase 3	2	2	521	0	0	256
1399	AT1G07730.2	Disease resistance-responsive (dirigent-like protein) family protein	2	2	389	0	0	127
1400	AT1G07740.1	Tetratricopeptide repeat (TPR)-like superfamily protein	2	2	459	0	0	230
1407	AT1G07750.1	RmlC-like cupins superfamily protein	2	2	356	0	0	24
1411	AT1G07780.1	phosphoribosylanthranilate isomerase 1	1	1	275	0	0	0
1412	AT1G07780.10	phosphoribosylanthranilate isomerase 1	1	1	275	0	0	0
1413	AT1G07780.11	phosphoribosylanthranilate isomerase 1	1	1	213	0	0	0
1414	AT1G07780.12	phosphoribosylanthranilate isomerase 1	1	1	275	0	0	0
1415	AT1G07780.13	phosphoribosylanthranilate isomerase 1	1	1	275	0	0	0
1416	AT1G07780.2	phosphoribosylanthranilate isomerase 1	1	1	275	0	0	0
1417	AT1G07780.3	phosphoribosylanthranilate isomerase 1	1	1	275	0	0	0
1418	AT1G07780.4	phosphoribosylanthranilate isomerase 1	1	1	213	0	0	0
1419	AT1G07780.5	phosphoribosylanthranilate isomerase 1	1	1	275	0	0	0
1420	AT1G07780.6	phosphoribosylanthranilate isomerase 1	1	1	225	0	0	0
1422	AT1G07780.8	phosphoribosylanthranilate isomerase 1	1	1	225	0	0	0
1423	AT1G07780.9	phosphoribosylanthranilate isomerase 1	1	1	275	0	0	0
1426	AT1G07810.1	ER-type Ca2+-ATPase 1	2	3	1061	0	0	811
1430	AT1G07840.1	Sas10/Utp3/C1D family	1	1	312	0	0	97
1431	AT1G07840.2	Sas10/Utp3/C1D family	1	1	312	0	0	97
1433	AT1G07850.1	transferring glycosyl group transferase (DUF604)	2	2	541	0	0	66
1435	AT1G07870.1	Protein kinase superfamily protein	3	4	423	0	0	94
1436	AT1G07870.2	Protein kinase superfamily protein	3	4	538	0	0	94
1437	AT1G07880.1	Protein kinase superfamily protein	1	1	254	0	0	0
1438	AT1G07880.2	Protein kinase superfamily protein	1	1	363	0	0	0
1441	AT1G07890.1	ascorbate peroxidase 1	1	1	250	0	0	0
1442	AT1G07890.2	ascorbate peroxidase 1	1	1	250	0	0	0
1443	AT1G07890.3	ascorbate peroxidase 1	1	1	250	0	0	0
1444	AT1G07890.4	ascorbate peroxidase 1	1	1	250	0	0	0
1445	AT1G07890.5	ascorbate peroxidase 1	1	1	250	0	0	0
1446	AT1G07890.6	ascorbate peroxidase 1	1	1	249	0	0	0
1447	AT1G07890.7	ascorbate peroxidase 1	1	1	250	0	0	0
1448	AT1G07890.8	ascorbate peroxidase 1	1	1	250	0	0	0
17610	AT2G34660.2	multidrug resistance-associated protein 2	3	10	1623	0	0	0
17691	AT2G35140.1	DCD (Development and Cell Death) domain protein	4	10	879	0	1	16
1467	AT1G07970.1	cytochrome B561%2C amino-terminal protein	1	1	693	0	0	0
1471	AT1G07990.1	SIT4 phosphatase-associated family protein	1	2	802	0	0	43
1472	AT1G07990.2	SIT4 phosphatase-associated family protein	1	1	588	0	0	43
1479	AT1G08030.1	tyrosylprotein sulfotransferase	1	1	500	0	0	0
1480	AT1G08030.2	tyrosylprotein sulfotransferase	1	1	500	0	0	0
1484	AT1G08040.1	trimethylguanosine synthase (DUF707)	1	1	382	0	0	0
1485	AT1G08040.2	trimethylguanosine synthase (DUF707)	1	1	382	0	0	0
1486	AT1G08040.3	trimethylguanosine synthase (DUF707)	1	1	378	0	0	0
1487	AT1G08040.4	trimethylguanosine synthase (DUF707)	1	1	382	0	0	0
1488	AT1G08050.1	Zinc finger (C3HC4-type RING finger) family protein	2	2	641	0	1	145
17692	AT2G35140.2	DCD (Development and Cell Death) domain protein	4	10	879	0	1	16
17693	AT2G35140.3	DCD (Development and Cell Death) domain protein	4	10	879	0	1	16
17694	AT2G35140.4	DCD (Development and Cell Death) domain protein	4	10	879	0	1	16
1492	AT1G08065.1	alpha carbonic anhydrase 5	1	1	277	0	0	1
1493	AT1G08070.1	Tetratricopeptide repeat (TPR)-like superfamily protein	2	3	741	0	0	244
1494	AT1G08070.2	Tetratricopeptide repeat (TPR)-like superfamily protein	2	3	637	0	0	140
1496	AT1G08090.1	nitrate transporter 2:1	4	4	530	0	0	222
1497	AT1G08100.1	nitrate transporter 2.2	4	4	522	0	0	220
1501	AT1G08110.4	lactoylglutathione lyase family protein / glyoxalase I family protein	2	2	235	0	0	0
1503	AT1G08125.1	S-adenosyl-L-methionine-dependent methyltransferases superfamily protein	1	1	315	0	0	0
1504	AT1G08125.2	S-adenosyl-L-methionine-dependent methyltransferases superfamily protein	1	1	322	0	0	0
1507	AT1G08130.1	DNA ligase 1	1	1	790	0	0	51
17695	AT2G35140.5	DCD (Development and Cell Death) domain protein	4	10	879	0	1	16
17696	AT2G35140.6	DCD (Development and Cell Death) domain protein	4	10	905	0	1	42
20218	AT2G48060.1	piezo-type mechanosensitive ion channel component	3	10	2462	0	1	603
1515	AT1G08190.1	vacuolar protein sorting 41	2	2	980	0	0	99
1516	AT1G08200.1	UDP-D-apiose/UDP-D-xylose synthase 2	1	1	389	0	0	0
1517	AT1G08210.1	Eukaryotic aspartyl protease family protein	2	2	492	0	1	28
1518	AT1G08210.2	Eukaryotic aspartyl protease family protein	2	2	519	0	1	28
1519	AT1G08210.3	Eukaryotic aspartyl protease family protein	2	2	540	0	1	76
1520	AT1G08210.4	Eukaryotic aspartyl protease family protein	2	2	526	0	1	62
1521	AT1G08220.1	ATPase complex subunit	4	4	274	0	0	53
1522	AT1G08220.2	ATPase complex subunit	3	3	202	0	0	0
20219	AT2G48060.2	piezo-type mechanosensitive ion channel component	3	10	2485	0	1	626
20220	AT2G48060.3	piezo-type mechanosensitive ion channel component	3	10	2373	0	1	514
23222	AT3G16030.1	lectin protein kinase family protein	5	10	850	0	3	138
23223	AT3G16030.2	lectin protein kinase family protein	5	10	727	0	3	5
23227	AT3G16030.6	lectin protein kinase family protein	5	10	871	0	3	149
1529	AT1G08260.1	DNA polymerase epsilon catalytic subunit	1	2	2161	0	0	0
1530	AT1G08260.2	DNA polymerase epsilon catalytic subunit	1	3	2114	0	0	0
1533	AT1G08280.1	Glycosyltransferase family 29 (sialyltransferase) family protein	2	2	398	0	1	143
1534	AT1G08290.1	WIP domain protein 3	1	1	337	0	0	113
1535	AT1G08300.1	no vein-like protein	1	1	746	0	0	0
1536	AT1G08300.2	no vein-like protein	1	1	656	0	0	0
1537	AT1G08300.3	no vein-like protein	1	1	618	0	0	0
1538	AT1G08310.1	alpha/beta-Hydrolases superfamily protein	2	2	315	0	0	33
1539	AT1G08310.2	alpha/beta-Hydrolases superfamily protein	2	2	318	0	0	36
1540	AT1G08310.3	alpha/beta-Hydrolases superfamily protein	1	1	248	0	0	0
1542	AT1G08320.1	bZIP transcription factor family protein	1	1	481	0	1	0
1544	AT1G08320.3	bZIP transcription factor family protein	1	1	481	0	1	0
1545	AT1G08320.4	bZIP transcription factor family protein	1	1	481	0	1	0
1547	AT1G08340.1	Rho GTPase activating protein with PAK-box/P21-Rho-binding domain-containing protein	1	1	331	0	0	0
1548	AT1G08350.1	Endomembrane protein 70 protein family	2	3	508	0	0	140
1549	AT1G08350.2	Endomembrane protein 70 protein family	2	3	589	0	0	221
1550	AT1G08350.3	Endomembrane protein 70 protein family	2	3	589	0	0	221
1551	AT1G08350.4	Endomembrane protein 70 protein family	2	3	536	0	0	221
1553	AT1G08370.1	decapping 1	1	1	367	0	0	75
1557	AT1G08400.1	RINT-1 / TIP-1 family	2	2	804	0	0	588
26663	AT3G47090.1	Leucine-rich repeat protein kinase family protein	4	10	1009	0	0	125
37561	AT5G03280.1	NRAMP metal ion transporter family protein	3	10	1294	0	0	43
1561	AT1G08430.1	aluminum-activated malate transporter 1	3	3	493	0	0	11
1562	AT1G08440.1	aluminum activated malate transporter family protein	2	2	501	0	0	8
1563	AT1G08450.1	calreticulin 3	3	3	424	0	0	3
1564	AT1G08450.2	calreticulin 3	2	2	370	0	0	0
1565	AT1G08450.3	calreticulin 3	3	3	399	0	0	3
1566	AT1G08460.1	histone deacetylase 8	1	1	377	0	0	63
1567	AT1G08460.2	histone deacetylase 8	1	1	324	0	0	63
1572	AT1G08500.1	early nodulin-like protein 18	1	1	228	0	0	0
1573	AT1G08510.1	fatty acyl-ACP thioesterases B	2	2	412	0	0	0
1575	AT1G08530.1	chitinase-like protein	1	1	257	0	0	0
1577	AT1G08530.3	chitinase-like protein	1	1	240	0	0	0
1578	AT1G08540.1	RNApolymerase sigma subunit 2	1	1	572	0	0	321
1579	AT1G08550.1	non-photochemical quenching 1	1	1	462	0	0	253
1580	AT1G08550.2	non-photochemical quenching 1	1	1	462	0	0	253
1581	AT1G08550.3	non-photochemical quenching 1	1	1	462	0	0	253
1583	AT1G08570.1	atypical CYS HIS rich thioredoxin 4	3	3	275	0	0	0
1584	AT1G08570.2	atypical CYS HIS rich thioredoxin 4	1	1	244	0	0	0
38466	AT5G07980.1	dentin sialophosphoprotein-like protein	3	10	1501	0	0	0
1589	AT1G08600.1	P-loop containing nucleoside triphosphate hydrolases superfamily protein	1	1	1458	0	0	106
1590	AT1G08600.2	P-loop containing nucleoside triphosphate hydrolases superfamily protein	1	1	1479	0	0	106
1591	AT1G08600.3	P-loop containing nucleoside triphosphate hydrolases superfamily protein	1	1	1479	0	0	106
1592	AT1G08600.4	P-loop containing nucleoside triphosphate hydrolases superfamily protein	1	1	1479	0	0	106
1593	AT1G08610.1	Pentatricopeptide repeat (PPR) superfamily protein	1	1	559	0	0	0
1594	AT1G08620.1	Transcription factor jumonji (jmj) family protein / zinc finger (C5HC2 type) family protein	2	3	1209	0	0	143
1595	AT1G08620.2	Transcription factor jumonji (jmj) family protein / zinc finger (C5HC2 type) family protein	2	3	1209	0	0	143
1596	AT1G08620.3	Transcription factor jumonji (jmj) family protein / zinc finger (C5HC2 type) family protein	2	3	1223	0	0	157
1597	AT1G08620.4	Transcription factor jumonji (jmj) family protein / zinc finger (C5HC2 type) family protein	2	3	1209	0	0	143
1605	AT1G08640.1	Chloroplast J-like domain 1	2	2	294	0	0	43
1607	AT1G08650.1	phosphoenolpyruvate carboxylase kinase 1	2	2	284	0	0	0
1608	AT1G08650.2	phosphoenolpyruvate carboxylase kinase 1	2	2	276	0	0	0
1609	AT1G08660.1	MALE GAMETOPHYTE DEFECTIVE 2	1	2	474	0	0	0
1610	AT1G08660.2	MALE GAMETOPHYTE DEFECTIVE 2	1	1	347	0	0	0
1611	AT1G08660.3	MALE GAMETOPHYTE DEFECTIVE 2	1	1	296	0	0	0
1612	AT1G08670.1	ENTH/VHS family protein	1	1	231	0	0	0
1614	AT1G08680.1	ARF GAP-like zinc finger-containing protein ZIGA4	1	1	649	0	0	334
1615	AT1G08680.2	ARF GAP-like zinc finger-containing protein ZIGA4	1	1	648	0	0	333
1616	AT1G08680.3	ARF GAP-like zinc finger-containing protein ZIGA4	1	1	607	0	0	292
1617	AT1G08680.4	ARF GAP-like zinc finger-containing protein ZIGA4	1	1	651	0	0	336
1618	AT1G08680.5	ARF GAP-like zinc finger-containing protein ZIGA4	1	1	580	0	0	334
1623	AT1G08720.1	Protein kinase superfamily protein	2	2	933	0	0	654
1624	AT1G08720.2	Protein kinase superfamily protein	2	2	906	0	0	654
1625	AT1G08730.1	Myosin family protein with Dil domain-containing protein	2	4	1538	0	0	24
1626	AT1G08730.2	Myosin family protein with Dil domain-containing protein	2	4	1530	0	0	16
1627	AT1G08750.1	Peptidase C13 family	1	1	388	0	0	87
1628	AT1G08750.2	Peptidase C13 family	1	1	388	0	0	87
1629	AT1G08750.3	Peptidase C13 family	1	1	388	0	0	87
1630	AT1G08760.1	GPI-anchored adhesin-like protein%2C putative (DUF936)	1	1	748	0	0	92
1634	AT1G08800.1	myosin-binding protein (Protein of unknown function%2C DUF593)	1	1	1113	0	0	0
1635	AT1G08800.2	myosin-binding protein (Protein of unknown function%2C DUF593)	1	1	1113	0	0	0
1636	AT1G08800.3	myosin-binding protein (Protein of unknown function%2C DUF593)	1	1	1113	0	0	0
1637	AT1G08800.4	myosin-binding protein (Protein of unknown function%2C DUF593)	1	1	1113	0	0	0
1648	AT1G08840.1	DNA replication helicase	2	3	1296	0	0	306
1649	AT1G08840.2	DNA replication helicase	2	3	1315	0	0	306
1650	AT1G08840.3	DNA replication helicase	2	3	1331	0	0	322
1651	AT1G08840.4	DNA replication helicase	2	3	1328	0	0	319
1652	AT1G08840.5	DNA replication helicase	2	3	1048	0	0	306
1654	AT1G08845.2	Ribosomal L18p/L5e family protein	1	1	234	0	0	0
1656	AT1G08860.1	Calcium-dependent phospholipid-binding Copine family protein	2	2	584	0	0	202
38467	AT5G07980.2	dentin sialophosphoprotein-like protein	3	10	1501	0	0	0
1659	AT1G08900.1	Major facilitator superfamily protein	2	3	462	0	0	0
1660	AT1G08900.2	Major facilitator superfamily protein	2	3	462	0	0	0
1661	AT1G08900.3	Major facilitator superfamily protein	2	3	454	0	0	0
1662	AT1G08900.4	Major facilitator superfamily protein	2	3	435	0	0	0
1663	AT1G08900.5	Major facilitator superfamily protein	2	3	420	0	0	0
1664	AT1G08910.1	zinc ion binding protein	1	3	829	0	0	0
42560	AT5G37830.1	oxoprolinase 1	4	10	1266	0	1	293
44307	AT5G47490.1	RGPR-like protein	4	10	1361	0	2	445
44308	AT5G47490.2	RGPR-like protein	4	10	1361	0	2	445
1668	AT1G08930.1	Major facilitator superfamily protein	2	3	496	0	0	239
1669	AT1G08930.2	Major facilitator superfamily protein	2	3	496	0	0	239
1670	AT1G08940.1	Phosphoglycerate mutase family protein	3	3	281	0	0	8
1671	AT1G08960.1	cation exchanger 11	2	2	546	0	0	43
4086	AT1G21630.1	Calcium-binding EF hand family protein	4	9	1218	0	2	728
1678	AT1G08990.1	plant glycogenin-like starch initiation protein 5	1	1	566	0	0	256
4087	AT1G21630.2	Calcium-binding EF hand family protein	4	9	1247	0	2	757
4088	AT1G21630.3	Calcium-binding EF hand family protein	4	9	1196	0	2	728
1681	AT1G09010.1	glycoside hydrolase family 2 protein	2	4	944	0	0	126
1682	AT1G09020.1	sucrose nonfermenting-like protein	1	2	487	0	0	0
1684	AT1G09040.1	arginine-glutamic acid dipeptide repeat protein	2	2	911	0	0	11
1685	AT1G09050.1	arginine-glutamic acid dipeptide repeat protein	1	1	916	0	0	0
1686	AT1G09050.2	arginine-glutamic acid dipeptide repeat protein	1	1	916	0	0	0
1687	AT1G09060.1	JmjC domain protein JMJ24	2	2	930	0	0	699
1688	AT1G09060.2	JmjC domain protein JMJ24	2	2	930	0	0	699
1689	AT1G09060.3	JmjC domain protein JMJ24	2	2	944	0	0	713
1690	AT1G09060.4	JmjC domain protein JMJ24	2	2	944	0	0	713
1691	AT1G09070.1	soybean gene regulated by cold-2	1	1	324	0	1	0
1694	AT1G09090.1	respiratory burst oxidase-like protein	2	4	622	0	0	0
1695	AT1G09090.2	respiratory burst oxidase-like protein	2	4	843	0	0	0
1697	AT1G09130.1	ATP-dependent caseinolytic (Clp) protease/crotonase family protein	1	1	330	0	0	97
1698	AT1G09130.2	ATP-dependent caseinolytic (Clp) protease/crotonase family protein	1	1	330	0	0	97
1699	AT1G09130.3	ATP-dependent caseinolytic (Clp) protease/crotonase family protein	1	1	370	0	0	97
1705	AT1G09157.1	transmembrane protein%2C putative (DUF679)	1	1	243	0	0	0
1706	AT1G09160.1	Protein phosphatase 2C family protein	2	2	428	0	0	0
1707	AT1G09160.2	Protein phosphatase 2C family protein	2	2	428	0	0	0
1708	AT1G09170.1	P-loop nucleoside triphosphate hydrolases superfamily protein with CH (Calponin Homology) domain-containing protein	2	3	1010	0	0	0
1709	AT1G09170.2	P-loop nucleoside triphosphate hydrolases superfamily protein with CH (Calponin Homology) domain-containing protein	2	3	894	0	0	0
1710	AT1G09170.3	P-loop nucleoside triphosphate hydrolases superfamily protein with CH (Calponin Homology) domain-containing protein	2	3	815	0	0	0
1711	AT1G09170.4	P-loop nucleoside triphosphate hydrolases superfamily protein with CH (Calponin Homology) domain-containing protein	2	3	847	0	0	0
1712	AT1G09170.5	P-loop nucleoside triphosphate hydrolases superfamily protein with CH (Calponin Homology) domain-containing protein	2	3	1046	0	0	0
1713	AT1G09170.6	P-loop nucleoside triphosphate hydrolases superfamily protein with CH (Calponin Homology) domain-containing protein	2	3	739	0	0	0
1714	AT1G09170.7	P-loop nucleoside triphosphate hydrolases superfamily protein with CH (Calponin Homology) domain-containing protein	2	3	815	0	0	0
1715	AT1G09170.8	P-loop nucleoside triphosphate hydrolases superfamily protein with CH (Calponin Homology) domain-containing protein	2	3	739	0	0	0
1718	AT1G09190.1	Tetratricopeptide repeat (TPR)-like superfamily protein	2	3	484	0	0	161
1719	AT1G09195.1	Ppx-GppA phosphatase	1	1	320	0	0	0
1720	AT1G09195.10	Ppx-GppA phosphatase	1	1	545	0	0	54
1721	AT1G09195.11	Ppx-GppA phosphatase	1	1	545	0	0	54
1722	AT1G09195.12	Ppx-GppA phosphatase	1	1	545	0	0	54
1723	AT1G09195.13	Ppx-GppA phosphatase	1	1	545	0	0	54
1724	AT1G09195.14	Ppx-GppA phosphatase	1	1	320	0	0	0
1725	AT1G09195.15	Ppx-GppA phosphatase	1	1	320	0	0	0
1726	AT1G09195.2	Ppx-GppA phosphatase	1	1	545	0	0	54
1727	AT1G09195.3	Ppx-GppA phosphatase	1	1	538	0	0	54
1728	AT1G09195.4	Ppx-GppA phosphatase	1	1	538	0	0	54
1729	AT1G09195.5	Ppx-GppA phosphatase	1	1	538	0	0	54
1730	AT1G09195.6	Ppx-GppA phosphatase	1	1	513	0	0	54
1731	AT1G09195.7	Ppx-GppA phosphatase	1	1	538	0	0	54
1732	AT1G09195.8	Ppx-GppA phosphatase	1	1	545	0	0	54
1733	AT1G09195.9	Ppx-GppA phosphatase	1	1	313	0	0	0
1735	AT1G09210.1	calreticulin 1b	2	2	424	0	0	0
1737	AT1G09230.1	RNA-binding (RRM/RBD/RNP motifs) family protein	2	3	442	0	0	232
1738	AT1G09230.2	RNA-binding (RRM/RBD/RNP motifs) family protein	2	2	394	0	0	184
1739	AT1G09230.3	RNA-binding (RRM/RBD/RNP motifs) family protein	1	2	418	0	0	0
1740	AT1G09240.1	nicotianamine synthase 3	1	1	320	0	0	113
1744	AT1G09270.1	importin alpha isoform 4	1	1	538	0	1	325
1745	AT1G09270.2	importin alpha isoform 4	1	1	538	0	1	325
1746	AT1G09270.3	importin alpha isoform 4	1	1	456	0	1	243
1747	AT1G09280.1	rhodanese-like domain protein	2	2	581	0	0	360
1752	AT1G09320.1	agenet domain-containing protein	1	1	517	0	0	133
1755	AT1G09340.1	chloroplast RNA binding protein	2	2	378	0	1	154
1756	AT1G09340.2	chloroplast RNA binding protein	2	2	379	0	1	155
1762	AT1G09390.1	GDSL-like Lipase/Acylhydrolase superfamily protein	1	1	370	0	1	0
1765	AT1G09410.1	pentatricopeptide (PPR) repeat-containing protein	1	1	705	0	0	264
1767	AT1G09420.1	glucose-6-phosphate dehydrogenase 4	2	3	625	0	0	100
1768	AT1G09420.2	glucose-6-phosphate dehydrogenase 4	2	3	635	0	0	100
1769	AT1G09430.1	ATP-citrate lyase A-3	2	2	424	0	0	40
1770	AT1G09440.1	Protein kinase superfamily protein	3	3	466	0	0	146
1771	AT1G09440.2	Protein kinase superfamily protein	3	3	466	0	0	146
1772	AT1G09450.1	Protein kinase superfamily protein	1	2	599	0	0	0
1773	AT1G09460.1	Carbohydrate-binding X8 domain superfamily protein	2	2	330	0	0	115
1777	AT1G09480.1	NAD(P)-binding Rossmann-fold superfamily protein	1	1	369	0	1	42
1778	AT1G09480.2	NAD(P)-binding Rossmann-fold superfamily protein	1	1	322	0	1	0
1793	AT1G09540.1	myb domain protein 61	2	2	366	0	0	163
1795	AT1G09560.1	germin-like protein 5	2	2	219	0	0	0
4089	AT1G21630.4	Calcium-binding EF hand family protein	4	9	1225	0	2	757
5496	AT1G30420.2	multidrug resistance-associated protein 12	4	9	1086	0	0	343
8217	AT1G55350.1	calpain-type cysteine protease family	2	9	2151	0	2	0
8218	AT1G55350.2	calpain-type cysteine protease family	2	9	2151	0	2	0
8219	AT1G55350.3	calpain-type cysteine protease family	2	9	2151	0	2	0
8220	AT1G55350.4	calpain-type cysteine protease family	2	9	2151	0	2	0
1806	AT1G09600.1	Protein kinase superfamily protein	1	1	714	0	0	107
1807	AT1G09610.1	glucuronoxylan 4-O-methyltransferase-like protein (DUF579)	1	1	282	0	0	0
8221	AT1G55350.5	calpain-type cysteine protease family	2	9	2179	0	2	0
1811	AT1G09640.1	Translation elongation factor EF1B%2C gamma chain	1	2	414	0	0	0
1812	AT1G09640.2	Translation elongation factor EF1B%2C gamma chain	1	1	265	0	0	0
1814	AT1G09650.1	F-box and associated interaction domains-containing protein	2	2	382	0	0	115
8222	AT1G55350.6	calpain-type cysteine protease family	2	9	2151	0	2	0
1822	AT1G09700.2	dsRNA-binding domain-like superfamily protein	1	1	279	0	0	70
1828	AT1G09720.1	Kinase interacting (KIP1-like) family protein	1	3	928	0	1	37
1829	AT1G09730.1	Cysteine proteinases superfamily protein	2	4	963	0	0	0
1830	AT1G09730.2	Cysteine proteinases superfamily protein	3	4	931	0	0	87
1833	AT1G09750.1	Eukaryotic aspartyl protease family protein	1	1	449	0	1	15
1834	AT1G09760.1	U2 small nuclear ribonucleoprotein A	1	1	249	0	0	28
1836	AT1G09780.1	Phosphoglycerate mutase%2C 2%2C3-bisphosphoglycerate-independent	1	1	557	0	0	162
1837	AT1G09790.1	COBRA-like protein 6 precursor	1	1	454	0	0	0
1838	AT1G09790.2	COBRA-like protein 6 precursor	1	1	443	0	0	0
1840	AT1G09795.1	ATP phosphoribosyl transferase 2	2	2	413	0	0	0
1841	AT1G09800.1	Pseudouridine synthase family protein	1	1	372	0	0	99
1842	AT1G09800.2	Pseudouridine synthase family protein	1	1	372	0	0	99
1848	AT1G09820.1	Pentatricopeptide repeat (PPR-like) superfamily protein	1	1	606	0	0	190
1849	AT1G09830.1	Glycinamide ribonucleotide (GAR) synthetase	2	3	532	0	0	73
1850	AT1G09840.1	shaggy-like protein kinase 41	4	4	421	0	0	57
1851	AT1G09840.10	shaggy-like protein kinase 41	4	4	421	0	0	57
1852	AT1G09840.11	shaggy-like protein kinase 41	3	3	294	0	0	0
1853	AT1G09840.2	shaggy-like protein kinase 41	4	4	421	0	0	57
1854	AT1G09840.3	shaggy-like protein kinase 41	4	4	421	0	0	57
1855	AT1G09840.4	shaggy-like protein kinase 41	4	4	421	0	0	57
1856	AT1G09840.5	shaggy-like protein kinase 41	4	4	421	0	0	57
1857	AT1G09840.6	shaggy-like protein kinase 41	4	4	421	0	0	57
1858	AT1G09840.7	shaggy-like protein kinase 41	4	4	421	0	0	57
1859	AT1G09840.8	shaggy-like protein kinase 41	4	4	421	0	0	57
1860	AT1G09840.9	shaggy-like protein kinase 41	4	4	421	0	0	57
1861	AT1G09850.1	xylem bark cysteine peptidase 3	1	1	437	0	0	170
1862	AT1G09860.1	purine permease 16	2	2	383	0	0	141
1863	AT1G09870.1	histidine acid phosphatase family protein	2	3	487	0	0	280
1864	AT1G09880.1	Rhamnogalacturonate lyase family protein	1	1	631	0	0	72
1865	AT1G09880.2	Rhamnogalacturonate lyase family protein	1	1	697	0	0	138
1866	AT1G09880.3	Rhamnogalacturonate lyase family protein	1	1	711	0	0	152
1867	AT1G09880.4	Rhamnogalacturonate lyase family protein	1	1	665	0	0	106
1868	AT1G09890.1	Rhamnogalacturonate lyase family protein	1	1	617	0	0	68
1869	AT1G09890.2	Rhamnogalacturonate lyase family protein	1	1	546	0	0	84
1870	AT1G09890.3	Rhamnogalacturonate lyase family protein	1	1	657	0	0	84
1871	AT1G09890.4	Rhamnogalacturonate lyase family protein	1	1	633	0	0	84
1872	AT1G09890.5	Rhamnogalacturonate lyase family protein	1	1	628	0	0	79
1878	AT1G09930.1	oligopeptide transporter 2	2	3	734	0	0	0
1883	AT1G09935.1	Phosphoglycerate mutase family protein	1	1	231	0	0	0
1884	AT1G09935.2	Phosphoglycerate mutase family protein	1	1	226	0	0	0
1885	AT1G09940.1	Glutamyl-tRNA reductase family protein	1	1	530	0	0	20
1887	AT1G09960.1	sucrose transporter 4	2	4	510	0	0	0
11970	AT1G77690.1	like AUX1 3	6	9	470	0	1	241
15005	AT2G21050.1	like AUXIN RESISTANT 2	6	9	483	0	1	237
1890	AT1G09980.1	Putative serine esterase family protein	1	1	802	0	0	260
1891	AT1G09980.2	Putative serine esterase family protein	1	1	801	0	0	259
1892	AT1G09980.3	Putative serine esterase family protein	1	1	802	0	0	260
1898	AT1G10000.1	Ribonuclease H-like superfamily protein	1	1	303	0	0	51
1899	AT1G10010.1	amino acid permease 8	3	3	475	0	0	110
1900	AT1G10010.2	amino acid permease 8	3	3	476	0	0	111
1901	AT1G10020.1	formin-like protein (DUF1005)	1	1	461	0	0	26
1905	AT1G10050.1	glycosyl hydrolase family 10 protein / carbohydrate-binding domain-containing protein	1	2	1063	0	0	315
1906	AT1G10050.2	glycosyl hydrolase family 10 protein / carbohydrate-binding domain-containing protein	1	2	1063	0	0	315
1907	AT1G10050.3	glycosyl hydrolase family 10 protein / carbohydrate-binding domain-containing protein	1	2	1095	0	0	347
1908	AT1G10060.1	branched-chain amino acid transaminase 1	2	2	309	0	0	0
1909	AT1G10060.2	branched-chain amino acid transaminase 1	2	2	384	0	0	0
1910	AT1G10060.3	branched-chain amino acid transaminase 1	2	2	318	0	0	0
1911	AT1G10060.4	branched-chain amino acid transaminase 1	2	3	469	0	1	74
1912	AT1G10060.5	branched-chain amino acid transaminase 1	2	3	480	0	1	74
1913	AT1G10060.6	branched-chain amino acid transaminase 1	2	3	405	0	1	74
1914	AT1G10060.7	branched-chain amino acid transaminase 1	2	2	373	0	0	0
1915	AT1G10070.1	branched-chain amino acid transaminase 2	1	1	388	0	0	0
1916	AT1G10070.2	branched-chain amino acid transaminase 2	1	1	388	0	0	0
1918	AT1G10090.1	Early-responsive to dehydration stress protein (ERD4)	2	3	762	0	0	419
1919	AT1G10095.1	Protein prenylyltransferase superfamily protein	1	1	420	0	0	0
1920	AT1G10095.2	Protein prenylyltransferase superfamily protein	1	1	407	0	0	0
1921	AT1G10095.3	Protein prenylyltransferase superfamily protein	1	1	306	0	0	0
1922	AT1G10095.4	Protein prenylyltransferase superfamily protein	1	1	303	0	0	0
1924	AT1G10110.1	F-box family protein	1	1	399	0	0	196
1925	AT1G10120.1	basic helix-loop-helix (bHLH) DNA-binding superfamily protein	1	1	366	0	0	0
1926	AT1G10120.2	basic helix-loop-helix (bHLH) DNA-binding superfamily protein	1	1	366	0	0	0
1927	AT1G10130.1	endoplasmic reticulum-type calcium-transporting ATPase 3	1	3	998	0	0	0
1929	AT1G10150.1	Carbohydrate-binding protein	1	1	414	0	0	0
1931	AT1G10170.1	NF-X-like 1	1	2	1188	0	0	479
1932	AT1G10170.2	NF-X-like 1	1	2	1116	0	0	407
1933	AT1G10170.3	NF-X-like 1	1	2	1188	0	0	479
1934	AT1G10170.4	NF-X-like 1	1	2	1209	0	0	479
1935	AT1G10180.1	LOW protein: exocyst complex component-like protein	2	2	769	0	0	218
15610	AT2G24230.1	Leucine-rich repeat protein kinase family protein	4	9	853	0	0	524
1939	AT1G10210.1	mitogen-activated protein kinase 1	1	1	370	0	0	0
1940	AT1G10210.2	mitogen-activated protein kinase 1	1	1	370	0	0	0
1941	AT1G10210.3	mitogen-activated protein kinase 1	1	1	370	0	0	0
1942	AT1G10220.1	ZCF37	1	1	207	0	0	0
1943	AT1G10220.2	ZCF37	1	1	218	0	0	0
1946	AT1G10240.1	FAR1-related sequence 11	3	3	680	0	0	215
1947	AT1G10240.2	FAR1-related sequence 11	3	3	680	0	0	215
1949	AT1G10270.1	glutamine-rich protein 23	3	4	913	0	0	314
1952	AT1G10300.1	Nucleolar GTP-binding protein	1	1	687	0	0	0
1954	AT1G10300.3	Nucleolar GTP-binding protein	1	1	687	0	0	0
1955	AT1G10310.1	NAD(P)-binding Rossmann-fold superfamily protein	1	1	242	0	0	8
1956	AT1G10320.1	Zinc finger C-x8-C-x5-C-x3-H type family protein	3	3	757	0	0	232
1957	AT1G10320.2	Zinc finger C-x8-C-x5-C-x3-H type family protein	3	3	748	0	0	223
1958	AT1G10330.1	Tetratricopeptide repeat (TPR)-like superfamily protein	1	1	467	0	0	7
1959	AT1G10340.1	Ankyrin repeat family protein	1	2	578	0	0	0
1960	AT1G10340.2	Ankyrin repeat family protein	1	2	574	0	0	0
1961	AT1G10350.1	DNAJ heat shock family protein	3	3	349	0	0	4
1963	AT1G10370.1	Glutathione S-transferase family protein	1	1	227	0	0	0
1964	AT1G10380.1	Putative membrane lipoprotein	1	1	305	0	0	0
1965	AT1G10380.2	Putative membrane lipoprotein	1	1	303	0	0	0
1966	AT1G10385.1	Vps51/Vps67 family (components of vesicular transport) protein	1	1	754	0	0	533
16526	AT2G29140.1	pumilio 3	3	9	964	0	0	0
16527	AT2G29140.2	pumilio 3	3	9	964	0	0	0
16531	AT2G29190.1	pumilio 2	3	9	972	0	0	0
1971	AT1G10400.1	UDP-Glycosyltransferase superfamily protein	2	2	467	0	0	88
1972	AT1G10410.1	CW14 protein (DUF1336)	2	2	485	0	0	226
1977	AT1G10430.1	protein phosphatase 2A-2	1	1	306	0	0	18
1978	AT1G10430.2	protein phosphatase 2A-2	1	1	306	0	0	18
1979	AT1G10450.1	paired amphipathic helix Sin3-like protein	1	3	1122	0	0	0
1980	AT1G10450.2	paired amphipathic helix Sin3-like protein	1	3	1122	0	0	0
1981	AT1G10450.3	paired amphipathic helix Sin3-like protein	2	4	1173	0	0	0
1983	AT1G10460.1	germin-like protein 7	1	1	217	0	0	0
1987	AT1G10480.1	zinc finger protein 5	2	2	211	0	0	0
1988	AT1G10490.1	GNAT acetyltransferase (DUF699)	1	2	1028	0	0	0
1989	AT1G10490.2	GNAT acetyltransferase (DUF699)	1	2	1028	0	0	0
1991	AT1G10510.1	RNI-like superfamily protein	1	2	605	0	0	0
16532	AT2G29190.2	pumilio 2	3	9	972	0	0	0
16533	AT2G29200.1	pumilio 1	3	9	968	0	0	0
16534	AT2G29200.2	pumilio 1	3	9	968	0	0	0
1998	AT1G10540.2	nucleobase-ascorbate transporter 8	3	4	394	1	0	148
1999	AT1G10550.1	xyloglucan:xyloglucosyl transferase 33	1	1	310	0	0	0
2000	AT1G10560.1	plant U-box 18	1	1	697	0	0	123
2004	AT1G10580.1	Transducin/WD40 repeat-like superfamily protein	2	3	573	0	0	0
2018	AT1G10610.1	basic helix-loop-helix (bHLH) DNA-binding superfamily protein	1	1	441	0	0	14
2019	AT1G10610.2	basic helix-loop-helix (bHLH) DNA-binding superfamily protein	1	1	411	0	0	0
2020	AT1G10610.3	basic helix-loop-helix (bHLH) DNA-binding superfamily protein	1	1	344	0	0	0
17293	AT2G33070.1	nitrile specifier protein 2	5	9	471	0	1	261
2024	AT1G10640.1	Pectin lyase-like superfamily protein	2	3	532	0	0	78
2025	AT1G10650.1	SBP (S-ribonuclease binding protein) family protein	1	1	339	0	0	62
2026	AT1G10650.2	SBP (S-ribonuclease binding protein) family protein	1	1	283	0	0	6
2031	AT1G10660.1	transmembrane protein	1	1	320	0	0	0
2032	AT1G10660.2	transmembrane protein	1	1	320	0	0	0
2033	AT1G10660.3	transmembrane protein	1	1	320	0	0	0
2034	AT1G10660.4	transmembrane protein	1	1	320	0	0	0
2035	AT1G10670.1	ATP-citrate lyase A-1	2	2	423	0	0	40
2036	AT1G10670.2	ATP-citrate lyase A-1	2	2	423	0	0	40
2037	AT1G10670.3	ATP-citrate lyase A-1	2	3	443	0	0	0
2038	AT1G10670.4	ATP-citrate lyase A-1	2	2	423	0	0	40
2039	AT1G10680.1	P-glycoprotein 10	1	2	1227	0	0	0
2040	AT1G10680.2	P-glycoprotein 10	1	2	1180	0	0	0
2042	AT1G10700.1	phosphoribosyl pyrophosphate (PRPP) synthase 3	1	1	411	0	1	42
2043	AT1G10700.2	phosphoribosyl pyrophosphate (PRPP) synthase 3	1	1	297	0	1	42
2049	AT1G10730.1	Clathrin adaptor complexes medium subunit family protein	1	1	428	0	0	0
17294	AT2G33070.2	nitrile specifier protein 2	5	9	471	0	1	261
17295	AT2G33070.3	nitrile specifier protein 2	5	9	473	0	1	263
18240	AT2G38120.1	Transmembrane amino acid transporter family protein	6	9	485	0	1	243
22180	AT3G11010.1	receptor like protein 34	5	9	894	1	0	681
2056	AT1G10750.1	carboxyl-terminal peptidase%2C putative (DUF239)	4	4	467	0	0	190
2057	AT1G10750.2	carboxyl-terminal peptidase%2C putative (DUF239)	3	3	354	0	0	138
2058	AT1G10760.1	Pyruvate phosphate dikinase%2C PEP/pyruvate binding domain-containing protein	1	1	1399	0	0	922
2059	AT1G10760.2	Pyruvate phosphate dikinase%2C PEP/pyruvate binding domain-containing protein	1	1	1399	0	0	922
2060	AT1G10760.3	Pyruvate phosphate dikinase%2C PEP/pyruvate binding domain-containing protein	1	1	1399	0	0	922
2064	AT1G10790.1	hydroxyproline-rich glycoprotein family protein	2	2	336	0	0	102
2067	AT1G10810.1	NAD(P)-linked oxidoreductase superfamily protein	1	1	344	0	0	0
2068	AT1G10810.2	NAD(P)-linked oxidoreductase superfamily protein	1	1	255	0	0	0
2069	AT1G10810.3	NAD(P)-linked oxidoreductase superfamily protein	1	1	292	0	0	0
2072	AT1G10830.1	15-cis-zeta-carotene isomerase	3	3	367	0	0	90
2073	AT1G10830.2	15-cis-zeta-carotene isomerase	2	2	285	0	0	0
2074	AT1G10830.3	15-cis-zeta-carotene isomerase	2	2	224	0	0	0
2077	AT1G10850.1	Leucine-rich repeat protein kinase family protein	1	1	663	0	0	345
2080	AT1G10870.1	ARF-GAP domain 4	1	3	775	0	0	0
2081	AT1G10870.2	ARF-GAP domain 4	1	3	780	0	0	0
2083	AT1G10880.1	core-2/I-branching beta-1%2C6-n-acetylglucosaminyltransferase family protein	3	3	386	0	1	185
2088	AT1G10900.1	Phosphatidylinositol-4-phosphate 5-kinase family protein	2	3	754	0	0	281
2089	AT1G10900.2	Phosphatidylinositol-4-phosphate 5-kinase family protein	2	3	754	0	0	281
2090	AT1G10900.3	Phosphatidylinositol-4-phosphate 5-kinase family protein	2	3	754	0	0	281
2091	AT1G10910.1	Pentatricopeptide repeat (PPR) superfamily protein	2	3	664	0	0	434
2092	AT1G10910.2	Pentatricopeptide repeat (PPR) superfamily protein	1	2	592	0	0	0
2093	AT1G10920.1	NB-ARC domain-containing disease resistance protein	1	2	727	0	0	0
2094	AT1G10920.2	NB-ARC domain-containing disease resistance protein	1	2	727	0	0	0
2095	AT1G10920.3	NB-ARC domain-containing disease resistance protein	1	2	557	0	0	0
2096	AT1G10920.4	NB-ARC domain-containing disease resistance protein	1	2	727	0	0	0
2097	AT1G10920.5	NB-ARC domain-containing disease resistance protein	1	2	557	0	0	0
2098	AT1G10930.1	DNA helicase (RECQl4A)	2	4	1188	0	0	534
2099	AT1G10940.1	Protein kinase superfamily protein	2	3	363	0	0	0
2100	AT1G10940.2	Protein kinase superfamily protein	2	3	371	0	0	0
2101	AT1G10950.1	transmembrane nine 1	4	4	589	0	1	354
2103	AT1G10970.1	zinc transporter	1	1	374	0	0	0
2104	AT1G10970.2	zinc transporter	1	1	374	0	0	0
2105	AT1G10980.1	Lung seven transmembrane receptor family protein	2	2	516	0	0	148
2108	AT1G11000.1	Seven transmembrane MLO family protein	2	3	573	0	1	301
2109	AT1G11000.2	Seven transmembrane MLO family protein	1	2	424	0	1	0
2110	AT1G11000.3	Seven transmembrane MLO family protein	2	3	573	0	1	301
2112	AT1G11040.1	HSP40/DnaJ peptide-binding protein	2	2	438	0	0	0
22181	AT3G11010.2	receptor like protein 34	5	9	957	1	0	744
2114	AT1G11060.1	WAPL (Wings apart-like protein regulation of heterochromatin) protein	1	2	930	0	0	0
2122	AT1G11090.1	alpha/beta-Hydrolases superfamily protein	2	2	324	0	1	94
2123	AT1G11100.1	SNF2 domain-containing protein / helicase domain-containing protein / zinc finger protein-like protein	1	3	1226	0	1	0
2124	AT1G11100.2	SNF2 domain-containing protein / helicase domain-containing protein / zinc finger protein-like protein	2	4	1269	0	1	520
2125	AT1G11100.3	SNF2 domain-containing protein / helicase domain-containing protein / zinc finger protein-like protein	2	3	1127	0	0	378
2126	AT1G11100.4	SNF2 domain-containing protein / helicase domain-containing protein / zinc finger protein-like protein	2	4	1270	0	1	521
2127	AT1G11100.5	SNF2 domain-containing protein / helicase domain-containing protein / zinc finger protein-like protein	1	2	1083	0	0	222
2135	AT1G11130.1	Leucine-rich repeat protein kinase family protein	2	3	768	0	0	0
2136	AT1G11130.2	Leucine-rich repeat protein kinase family protein	1	1	690	0	0	288
2138	AT1G11160.1	Transducin/WD40 repeat-like superfamily protein	2	4	1021	0	0	342
2139	AT1G11160.2	Transducin/WD40 repeat-like superfamily protein	2	4	1019	0	0	340
2140	AT1G11160.3	Transducin/WD40 repeat-like superfamily protein	2	4	977	0	0	298
2141	AT1G11160.4	Transducin/WD40 repeat-like superfamily protein	2	4	1000	0	0	340
2151	AT1G11180.1	Secretory carrier membrane protein (SCAMP) family protein	2	3	291	0	1	0
2152	AT1G11180.2	Secretory carrier membrane protein (SCAMP) family protein	2	3	297	0	1	8
2153	AT1G11180.3	Secretory carrier membrane protein (SCAMP) family protein	2	3	284	0	1	0
2156	AT1G11210.1	cotton fiber protein%2C putative (DUF761)	2	2	308	0	0	27
2159	AT1G11230.1	transmembrane protein%2C putative (DUF761)	1	1	301	0	0	30
2160	AT1G11230.2	transmembrane protein%2C putative (DUF761)	1	1	341	0	0	70
23970	AT3G19930.1	sugar transporter 4	5	9	514	0	0	0
2164	AT1G11270.1	F-box and associated interaction domains-containing protein	2	2	312	0	0	0
2165	AT1G11270.2	F-box and associated interaction domains-containing protein	2	2	312	0	0	0
2166	AT1G11270.3	F-box and associated interaction domains-containing protein	2	2	223	0	0	0
23971	AT3G19930.2	sugar transporter 4	5	9	514	0	0	0
24191	AT3G21100.1	RNA-binding (RRM/RBD/RNP motifs) family protein	9	9	602	0	0	159
24192	AT3G21100.2	RNA-binding (RRM/RBD/RNP motifs) family protein	9	9	602	0	0	159
24193	AT3G21100.3	RNA-binding (RRM/RBD/RNP motifs) family protein	9	9	603	0	0	159
2171	AT1G11280.5	S-locus lectin protein kinase family protein	2	4	671	0	0	251
2172	AT1G11290.1	Pentatricopeptide repeat (PPR) superfamily protein	2	3	809	0	0	320
2173	AT1G11300.1	G-type lectin S-receptor-like Serine/Threonine-kinase	2	3	820	0	1	454
2174	AT1G11300.2	G-type lectin S-receptor-like Serine/Threonine-kinase	2	3	805	0	1	439
2175	AT1G11303.1	G-type lectin S-receptor-like Serine/Threonine-kinase	3	4	820	0	1	454
2176	AT1G11310.1	Seven transmembrane MLO family protein	4	4	573	0	1	168
2177	AT1G11310.2	Seven transmembrane MLO family protein	4	4	418	0	1	168
2178	AT1G11310.3	Seven transmembrane MLO family protein	4	4	511	0	1	106
2179	AT1G11320.1	GDSL esterase/lipase	1	2	424	0	0	0
24194	AT3G21100.4	RNA-binding (RRM/RBD/RNP motifs) family protein	9	9	603	0	0	159
24417	AT3G22310.1	putative mitochondrial RNA helicase 1	6	9	610	0	0	402
24418	AT3G22310.2	putative mitochondrial RNA helicase 1	6	9	595	0	0	387
25316	AT3G27120.1	P-loop containing nucleoside triphosphate hydrolases superfamily protein	5	9	680	0	1	51
2184	AT1G11340.2	G-type lectin S-receptor-like Serine/Threonine-kinase	3	4	749	0	1	534
26846	AT3G48190.1	Serine/Threonine-kinase ATM-like protein	3	9	2598	0	0	872
2186	AT1G11350.1	S-domain-1 13	2	3	830	0	1	457
2187	AT1G11360.1	Adenine nucleotide alpha hydrolases-like superfamily protein	1	1	242	0	0	0
2188	AT1G11360.2	Adenine nucleotide alpha hydrolases-like superfamily protein	1	1	242	0	0	0
2189	AT1G11360.3	Adenine nucleotide alpha hydrolases-like superfamily protein	1	1	242	0	0	0
2190	AT1G11360.4	Adenine nucleotide alpha hydrolases-like superfamily protein	1	1	242	0	0	0
2192	AT1G11370.1	Pectin lyase-like superfamily protein	1	1	288	0	1	0
2193	AT1G11380.1	PLAC8 family protein	2	2	254	0	0	0
2194	AT1G11390.1	Protein kinase superfamily protein	2	2	624	0	0	161
30926	AT4G08850.2	Leucine-rich repeat receptor-like protein kinase family protein	5	9	1009	1	1	795
33081	AT4G19500.1	nucleoside-triphosphatase/transmembrane receptor/nucleotide binding/ATP binding protein	4	9	1309	0	1	111
33345	AT4G20720.1	dentin sialophosphoprotein-like protein	7	9	729	0	0	262
33346	AT4G20720.2	dentin sialophosphoprotein-like protein	7	9	619	0	0	152
2205	AT1G11420.1	agenet domain protein (DOMAIN OF UNKNOWN FUNCTION 724 2)	2	3	604	0	0	141
2207	AT1G11440.1	hypothetical protein	2	2	363	0	0	137
2216	AT1G11480.1	eukaryotic translation initiation factor-like protein	1	1	578	0	0	198
2217	AT1G11480.2	eukaryotic translation initiation factor-like protein	1	1	565	0	0	185
2218	AT1G11490.1	zinc finger (C2H2 type) family protein	1	1	365	0	0	0
2219	AT1G11490.2	zinc finger (C2H2 type) family protein	1	1	365	0	0	0
2223	AT1G11510.1	DNA-binding storekeeper protein-related transcriptional regulator	1	1	352	0	0	149
2224	AT1G11510.2	DNA-binding storekeeper protein-related transcriptional regulator	1	1	323	0	0	120
2227	AT1G11540.1	Sulfite exporter TauE/SafE family protein	1	1	367	1	0	46
2228	AT1G11540.2	Sulfite exporter TauE/SafE family protein	1	1	450	1	0	129
2229	AT1G11545.1	xyloglucan endotransglucosylase/hydrolase 8	1	1	305	0	0	0
2236	AT1G11580.1	methylesterase PCR A	1	1	557	0	1	199
2237	AT1G11580.2	methylesterase PCR A	1	1	578	0	1	220
2241	AT1G11600.1	cytochrome P450%2C family 77%2C subfamily B%2C polypeptide 1	1	2	510	0	0	0
2243	AT1G11610.1	cytochrome P450%2C family 71%2C subfamily A%2C polypeptide 18	2	4	497	0	0	0
2244	AT1G11610.2	cytochrome P450%2C family 71%2C subfamily A%2C polypeptide 18	2	4	504	0	0	0
2245	AT1G11620.1	F-box and associated interaction domains-containing protein	2	2	363	0	0	0
2246	AT1G11630.1	Tetratricopeptide repeat (TPR)-like superfamily protein	2	2	405	0	0	47
2250	AT1G11660.1	heat shock protein 70 (Hsp 70) family protein	1	1	763	0	0	0
2251	AT1G11660.2	heat shock protein 70 (Hsp 70) family protein	1	1	726	0	0	0
2252	AT1G11660.3	heat shock protein 70 (Hsp 70) family protein	1	1	763	0	0	0
2253	AT1G11660.4	heat shock protein 70 (Hsp 70) family protein	1	1	763	0	0	0
2254	AT1G11670.1	MATE efflux family protein	1	1	503	0	1	26
2255	AT1G11680.1	CYTOCHROME P450 51G1	1	2	488	0	0	0
2259	AT1G11710.1	Pentatricopeptide repeat (PPR) superfamily protein	2	3	657	0	0	383
2260	AT1G11710.2	Pentatricopeptide repeat (PPR) superfamily protein	2	3	628	0	0	354
2261	AT1G11720.1	starch synthase 3	2	3	1042	0	0	557
2262	AT1G11720.2	starch synthase 3	2	3	1094	0	0	609
2263	AT1G11730.1	Galactosyltransferase family protein	1	1	384	0	0	70
2264	AT1G11740.1	ankyrin repeat family protein	1	1	644	0	0	0
2265	AT1G11750.1	CLP protease proteolytic subunit 6	3	3	271	0	0	61
2266	AT1G11750.2	CLP protease proteolytic subunit 6	3	3	289	0	1	79
2270	AT1G11770.1	FAD-binding Berberine family protein	3	4	536	0	0	301
2271	AT1G11780.1	oxidoreductase%2C 2OG-Fe(II) oxygenase family protein	1	1	345	0	0	35
2275	AT1G11800.1	endonuclease/exonuclease/phosphatase family protein	3	3	441	0	0	233
2276	AT1G11810.1	F-box associated ubiquitination effector family protein	4	4	377	0	1	136
2280	AT1G11840.1	glyoxalase/bleomycin resistance protein/dioxygenase superfamily protein	3	3	283	0	0	0
2281	AT1G11840.2	glyoxalase/bleomycin resistance protein/dioxygenase superfamily protein	3	3	283	0	0	0
2282	AT1G11840.3	glyoxalase/bleomycin resistance protein/dioxygenase superfamily protein	3	3	283	0	0	0
2283	AT1G11840.4	glyoxalase/bleomycin resistance protein/dioxygenase superfamily protein	3	3	283	0	0	0
2284	AT1G11840.5	glyoxalase/bleomycin resistance protein/dioxygenase superfamily protein	3	3	232	0	0	0
2285	AT1G11840.6	glyoxalase/bleomycin resistance protein/dioxygenase superfamily protein	3	3	322	0	0	0
2290	AT1G11860.1	Glycine cleavage T-protein family	1	1	408	0	0	9
2291	AT1G11860.2	Glycine cleavage T-protein family	1	1	408	0	0	9
2292	AT1G11860.3	Glycine cleavage T-protein family	1	1	423	0	0	24
2293	AT1G11870.1	Seryl-tRNA synthetase	1	1	512	0	0	220
2294	AT1G11870.2	Seryl-tRNA synthetase	1	1	514	0	0	222
2296	AT1G11870.4	Seryl-tRNA synthetase	1	1	448	0	0	222
2297	AT1G11870.5	Seryl-tRNA synthetase	1	1	459	0	0	222
2298	AT1G11870.6	Seryl-tRNA synthetase	1	1	380	0	0	88
2302	AT1G11890.1	Synaptobrevin family protein	1	1	218	0	0	5
2306	AT1G11910.1	aspartic proteinase A1	1	2	506	0	1	39
2307	AT1G11910.2	aspartic proteinase A1	1	2	517	0	1	50
2309	AT1G11920.1	Pectin lyase-like superfamily protein	2	2	384	0	0	56
2311	AT1G11930.1	Putative pyridoxal phosphate-dependent enzyme%2C YBL036C type	3	3	257	0	0	50
2312	AT1G11930.2	Putative pyridoxal phosphate-dependent enzyme%2C YBL036C type	3	3	255	0	0	48
2313	AT1G11940.1	Core-2/I-branching beta-1%2C6-N-acetylglucosaminyltransferase family protein	1	1	383	0	0	0
2314	AT1G11940.2	Core-2/I-branching beta-1%2C6-N-acetylglucosaminyltransferase family protein	1	1	272	0	0	0
2315	AT1G11950.1	Transcription factor jumonji (jmjC) domain-containing protein	1	1	875	0	0	583
2316	AT1G11950.2	Transcription factor jumonji (jmjC) domain-containing protein	1	1	808	0	0	583
2317	AT1G11950.3	Transcription factor jumonji (jmjC) domain-containing protein	1	1	875	0	0	583
2319	AT1G11960.2	ERD (early-responsive to dehydration stress) family protein	1	1	633	0	0	433
2323	AT1G11990.1	O-fucosyltransferase family protein	3	3	590	0	0	181
2324	AT1G11990.2	O-fucosyltransferase family protein	3	3	612	0	0	203
2325	AT1G12000.1	Phosphofructokinase family protein	2	2	566	0	0	239
2326	AT1G12010.1	2-oxoglutarate (2OG) and Fe(II)-dependent oxygenase superfamily protein	1	1	320	0	0	0
2327	AT1G12020.1	hypothetical protein	1	1	226	0	0	23
2328	AT1G12030.1	phosphoenolpyruvate carboxylase%2C putative (DUF506)	2	2	295	0	0	30
2329	AT1G12040.1	leucine-rich repeat/extensin 1	2	2	744	0	1	176
37196	AT5G01240.1	like AUXIN RESISTANT 1	6	9	488	0	1	249
2338	AT1G12110.1	nitrate transporter 1.1	1	2	590	0	0	0
2339	AT1G12120.1	hypothetical protein (DUF863)	2	2	483	0	0	0
2341	AT1G12140.1	flavin-monooxygenase glucosinolate S-oxygenase 5	1	1	459	0	0	175
2342	AT1G12140.2	flavin-monooxygenase glucosinolate S-oxygenase 5	1	1	457	0	0	173
2343	AT1G12140.3	flavin-monooxygenase glucosinolate S-oxygenase 5	1	1	459	0	0	175
2344	AT1G12150.1	weak chloroplast movement under blue light protein (DUF827)	1	1	548	0	0	0
2345	AT1G12150.2	weak chloroplast movement under blue light protein (DUF827)	1	1	548	0	0	0
2346	AT1G12160.1	Flavin-binding monooxygenase family protein	1	1	468	0	0	236
2349	AT1G12190.1	F-box and associated interaction domains-containing protein	2	2	375	0	1	0
2359	AT1G12230.1	Aldolase superfamily protein	1	1	405	0	0	197
2360	AT1G12230.2	Aldolase superfamily protein	1	1	427	0	0	219
2361	AT1G12240.1	Glycosyl hydrolases family 32 protein	2	3	664	0	0	402
2363	AT1G12250.1	Pentapeptide repeat-containing protein	1	1	280	0	0	0
2364	AT1G12250.2	Pentapeptide repeat-containing protein	1	1	206	0	0	0
2368	AT1G12270.1	stress-inducible protein	1	1	572	0	0	0
2369	AT1G12280.1	LRR and NB-ARC domains-containing disease resistance protein	2	3	894	0	0	8
2370	AT1G12280.2	LRR and NB-ARC domains-containing disease resistance protein	2	3	823	0	0	0
2371	AT1G12290.1	Disease resistance protein (CC-NBS-LRR class) family	1	1	884	0	0	185
2372	AT1G12290.2	Disease resistance protein (CC-NBS-LRR class) family	1	1	842	0	0	143
2373	AT1G12290.3	Disease resistance protein (CC-NBS-LRR class) family	1	1	842	0	0	143
2374	AT1G12290.4	Disease resistance protein (CC-NBS-LRR class) family	1	1	842	0	0	143
2377	AT1G12320.1	ankyrin repeat/KH domain protein (DUF1442)	1	1	212	0	0	0
2378	AT1G12330.1	cyclin-dependent kinase-like protein	1	1	505	0	0	203
2382	AT1G12360.1	Sec1/munc18-like (SM) proteins superfamily	1	2	666	0	0	0
2383	AT1G12370.1	photolyase 1	2	2	490	0	0	238
2384	AT1G12370.2	photolyase 1	2	2	496	0	0	244
2385	AT1G12370.3	photolyase 1	2	2	466	0	0	214
2393	AT1G12420.1	ACT domain repeat 8	1	1	441	0	1	235
2394	AT1G12420.2	ACT domain repeat 8	1	1	369	0	1	163
2395	AT1G12430.1	armadillo repeat kinesin 3	2	2	919	0	0	206
2396	AT1G12430.2	armadillo repeat kinesin 3	2	2	920	0	0	206
2400	AT1G12450.1	SNARE associated Golgi protein family	1	1	303	0	0	0
37197	AT5G01240.2	like AUXIN RESISTANT 1	6	9	408	0	1	169
38456	AT5G07940.1	dentin sialophosphoprotein-like protein	4	9	1526	0	0	429
2403	AT1G12470.1	zinc ion binding protein	1	3	988	0	0	0
2404	AT1G12480.1	C4-dicarboxylate transporter/malic acid transport protein	2	2	556	0	0	0
2405	AT1G12490.1	F-box associated ubiquitination effector family protein	2	2	352	0	0	87
2406	AT1G12500.1	Nucleotide-sugar transporter family protein	2	3	361	0	0	6
2407	AT1G12520.1	copper chaperone for SOD1	1	1	320	0	0	0
2408	AT1G12520.2	copper chaperone for SOD1	1	1	229	0	0	0
2412	AT1G12550.1	D-isomer specific 2-hydroxyacid dehydrogenase family protein	3	3	323	0	0	78
2414	AT1G12570.1	Glucose-methanol-choline (GMC) oxidoreductase family protein	2	3	572	0	0	0
2415	AT1G12580.1	phosphoenolpyruvate carboxylase-related kinase 1	2	3	522	0	0	0
2416	AT1G12600.1	UDP-N-acetylglucosamine (UAA) transporter family	2	3	349	0	1	0
2417	AT1G12610.1	Integrase-type DNA-binding superfamily protein	2	2	209	0	0	0
2421	AT1G12640.1	MBOAT (membrane bound O-acyl transferase) family protein	2	2	462	0	0	0
2431	AT1G12680.1	phosphoenolpyruvate carboxylase-related kinase 2	3	3	470	0	0	44
2435	AT1G12710.1	phloem protein 2-A12	2	2	291	0	0	0
2436	AT1G12710.2	phloem protein 2-A12	2	3	333	0	0	0
2437	AT1G12730.1	GPI transamidase subunit PIG-U	1	2	474	0	1	0
2438	AT1G12730.2	GPI transamidase subunit PIG-U	1	2	390	0	1	0
2439	AT1G12740.1	cytochrome P450%2C family 87%2C subfamily A%2C polypeptide 2	2	3	472	0	0	0
2440	AT1G12740.2	cytochrome P450%2C family 87%2C subfamily A%2C polypeptide 2	2	3	478	0	0	0
2441	AT1G12740.3	cytochrome P450%2C family 87%2C subfamily A%2C polypeptide 2	2	2	366	0	0	0
2442	AT1G12740.4	cytochrome P450%2C family 87%2C subfamily A%2C polypeptide 2	2	3	478	0	0	0
2443	AT1G12750.1	RHOMBOID-like protein 6	3	3	307	0	0	0
2445	AT1G12750.3	RHOMBOID-like protein 6	3	3	307	0	0	0
2446	AT1G12750.4	RHOMBOID-like protein 6	3	3	307	0	0	0
2447	AT1G12750.5	RHOMBOID-like protein 6	3	3	210	0	0	0
2448	AT1G12750.6	RHOMBOID-like protein 6	3	3	307	0	0	0
2449	AT1G12750.7	RHOMBOID-like protein 6	3	3	307	0	0	0
2452	AT1G12770.1	P-loop containing nucleoside triphosphate hydrolases superfamily protein	1	1	551	0	0	0
2453	AT1G12770.2	P-loop containing nucleoside triphosphate hydrolases superfamily protein	1	1	551	0	0	0
2454	AT1G12775.1	Pentatricopeptide repeat (PPR) superfamily protein	1	1	644	0	0	297
2456	AT1G12790.1	DNA ligase-like protein	1	1	250	0	0	0
2457	AT1G12800.1	Nucleic acid-binding%2C OB-fold-like protein	1	2	767	0	0	0
2461	AT1G12820.1	auxin signaling F-box 3	2	2	577	0	0	291
2467	AT1G12860.1	basic helix-loop-helix (bHLH) DNA-binding superfamily protein	1	1	450	0	0	0
2468	AT1G12860.2	basic helix-loop-helix (bHLH) DNA-binding superfamily protein	1	1	425	0	0	0
2469	AT1G12860.3	basic helix-loop-helix (bHLH) DNA-binding superfamily protein	2	2	321	0	0	118
2472	AT1G12890.1	Integrase-type DNA-binding superfamily protein	2	2	219	0	0	0
2473	AT1G12900.1	glyceraldehyde 3-phosphate dehydrogenase A subunit 2	2	2	399	0	0	33
2474	AT1G12900.2	glyceraldehyde 3-phosphate dehydrogenase A subunit 2	1	1	317	0	0	0
2475	AT1G12900.3	glyceraldehyde 3-phosphate dehydrogenase A subunit 2	2	2	350	0	0	0
2476	AT1G12900.4	glyceraldehyde 3-phosphate dehydrogenase A subunit 2	2	2	350	0	0	0
2477	AT1G12900.5	glyceraldehyde 3-phosphate dehydrogenase A subunit 2	2	2	441	0	0	75
38457	AT5G07940.2	dentin sialophosphoprotein-like protein	4	9	1526	0	0	429
2480	AT1G12930.1	ARM repeat superfamily protein	1	2	1005	0	0	230
38458	AT5G07940.3	dentin sialophosphoprotein-like protein	4	9	1526	0	0	429
38459	AT5G07940.4	dentin sialophosphoprotein-like protein	4	9	1485	0	0	388
2484	AT1G12970.1	plant intracellular ras group-related LRR 3	1	2	464	0	1	0
2486	AT1G12990.1	beta-1%2C4-N-acetylglucosaminyltransferase family protein	1	1	392	0	0	121
2487	AT1G13000.1	transmembrane protein%2C putative (DUF707)	1	1	401	0	0	0
2488	AT1G13000.2	transmembrane protein%2C putative (DUF707)	1	1	401	0	0	0
2489	AT1G13000.3	transmembrane protein%2C putative (DUF707)	1	1	339	0	0	0
2490	AT1G13000.4	transmembrane protein%2C putative (DUF707)	1	1	401	0	0	0
2491	AT1G13000.5	transmembrane protein%2C putative (DUF707)	1	1	401	0	0	0
2492	AT1G13020.1	eukaryotic initiation factor 4B2	4	4	549	0	0	167
2493	AT1G13030.1	sphere organelles protein-like protein	1	1	608	0	0	125
2499	AT1G13060.1	20S proteasome beta subunit E1	1	1	274	0	0	0
2500	AT1G13060.2	20S proteasome beta subunit E1	2	2	298	0	0	0
2501	AT1G13060.3	20S proteasome beta subunit E1	2	2	298	0	0	0
2502	AT1G13080.1	cytochrome P450%2C family 71%2C subfamily B%2C polypeptide 2	1	1	502	0	0	238
2503	AT1G13080.2	cytochrome P450%2C family 71%2C subfamily B%2C polypeptide 2	1	1	384	0	0	120
2504	AT1G13090.1	cytochrome P450%2C family 71%2C subfamily B%2C polypeptide 28	1	1	298	0	0	0
2505	AT1G13090.2	cytochrome P450%2C family 71%2C subfamily B%2C polypeptide 28	1	2	490	0	0	0
2506	AT1G13100.1	cytochrome P450%2C family 71%2C subfamily B%2C polypeptide 29	2	3	490	0	0	0
2507	AT1G13110.1	cytochrome P450%2C family 71 subfamily B%2C polypeptide 7	3	4	504	0	0	0
2508	AT1G13120.1	nucleoporin GLE1-like protein	1	1	611	0	0	321
2509	AT1G13130.1	Cellulase (glycosyl hydrolase family 5) protein	3	3	552	0	0	136
2510	AT1G13140.1	cytochrome P450%2C family 86%2C subfamily C%2C polypeptide 3	1	1	534	0	0	0
2511	AT1G13140.2	cytochrome P450%2C family 86%2C subfamily C%2C polypeptide 3	1	1	508	0	0	0
2513	AT1G13150.1	cytochrome P450%2C family 86%2C subfamily C%2C polypeptide 4	1	1	529	0	0	0
2514	AT1G13160.1	ARM repeat superfamily protein	1	1	804	0	0	0
2515	AT1G13170.1	OSBP(oxysterol binding protein)-related protein 1D	2	2	816	0	1	0
2516	AT1G13170.2	OSBP(oxysterol binding protein)-related protein 1D	2	2	837	0	1	0
2517	AT1G13180.1	Actin-like ATPase superfamily protein	2	2	427	0	0	189
2518	AT1G13190.1	RNA-binding (RRM/RBD/RNP motifs) family protein	2	3	573	0	0	242
2522	AT1G13210.1	autoinhibited Ca2+/ATPase II	2	4	1203	0	0	123
2524	AT1G13220.2	nuclear matrix constituent protein-like protein	1	1	1128	0	0	548
2525	AT1G13220.3	nuclear matrix constituent protein-like protein	1	1	1141	0	0	561
2526	AT1G13230.1	Leucine-rich repeat (LRR) family protein	1	2	424	0	0	0
2529	AT1G13260.1	related to ABI3/VP1 1	1	1	344	0	0	106
2530	AT1G13270.1	methionine aminopeptidase 1B	1	1	369	0	0	80
2532	AT1G13280.1	allene oxide cyclase 4	1	1	254	0	1	0
2533	AT1G13290.1	C2H2-like zinc finger protein	1	1	302	0	0	35
2535	AT1G13310.1	Endosomal targeting BRO1-like domain-containing protein	2	2	374	0	1	30
2536	AT1G13320.1	protein phosphatase 2A subunit A3	1	1	587	0	0	268
2537	AT1G13320.2	protein phosphatase 2A subunit A3	1	1	537	0	0	268
2538	AT1G13320.3	protein phosphatase 2A subunit A3	1	1	587	0	0	268
2539	AT1G13320.4	protein phosphatase 2A subunit A3	1	1	412	0	0	93
2541	AT1G13340.1	Regulator of Vps4 activity in the MVB pathway protein	1	1	409	0	0	0
2542	AT1G13350.1	Protein kinase superfamily protein	2	4	761	0	0	513
2543	AT1G13350.2	Protein kinase superfamily protein	2	4	788	0	0	540
2544	AT1G13350.3	Protein kinase superfamily protein	2	4	834	0	0	586
2553	AT1G13410.1	Tetratricopeptide repeat (TPR)-like superfamily protein	2	2	474	0	2	7
2556	AT1G13440.1	glyceraldehyde-3-phosphate dehydrogenase C2	4	4	338	0	0	0
2557	AT1G13440.2	glyceraldehyde-3-phosphate dehydrogenase C2	4	4	310	0	0	0
2558	AT1G13450.1	Homeodomain-like superfamily protein	4	4	406	0	0	106
2559	AT1G13450.2	Homeodomain-like superfamily protein	1	1	278	0	0	15
2560	AT1G13450.3	Homeodomain-like superfamily protein	1	1	278	0	0	15
2561	AT1G13450.4	Homeodomain-like superfamily protein	1	1	229	0	0	15
2564	AT1G13470.1	hypothetical protein (DUF1262)	2	3	379	0	0	0
2565	AT1G13480.1	hypothetical protein (DUF1262)	2	3	387	0	0	0
2567	AT1G13490.1	hypothetical protein (DUF1262)	1	2	363	0	0	0
2568	AT1G13490.2	hypothetical protein (DUF1262)	1	2	382	0	0	0
2569	AT1G13500.1	hypothetical protein (DUF1262)	1	1	386	0	0	123
2570	AT1G13510.1	hypothetical protein (DUF1262)	1	2	380	0	0	0
2571	AT1G13520.1	hypothetical protein (DUF1262)	2	3	387	0	0	0
38460	AT5G07940.5	dentin sialophosphoprotein-like protein	4	9	1485	0	0	388
2573	AT1G13540.1	hypothetical protein (DUF1262)	2	3	381	0	0	118
2574	AT1G13550.1	hypothetical protein (DUF1262)	2	3	388	0	0	0
2575	AT1G13560.1	aminoalcoholphosphotransferase 1	2	2	389	0	0	97
2576	AT1G13560.2	aminoalcoholphosphotransferase 1	2	2	346	0	0	54
2577	AT1G13560.3	aminoalcoholphosphotransferase 1	2	2	341	0	0	49
2581	AT1G13580.1	LAG1 longevity assurance-like protein	1	1	239	0	0	0
2582	AT1G13580.2	LAG1 longevity assurance-like protein	1	1	308	0	0	0
2583	AT1G13580.3	LAG1 longevity assurance-like protein	1	1	308	0	0	0
2591	AT1G13610.1	alpha/beta-Hydrolases superfamily protein	1	1	358	0	0	117
2592	AT1G13610.2	alpha/beta-Hydrolases superfamily protein	1	1	258	0	0	17
2595	AT1G13630.1	Tetratricopeptide repeat (TPR)-like superfamily protein	1	1	806	0	0	0
2596	AT1G13630.2	Tetratricopeptide repeat (TPR)-like superfamily protein	1	1	826	0	0	0
2598	AT1G13630.4	Tetratricopeptide repeat (TPR)-like superfamily protein	1	1	831	0	0	0
2599	AT1G13630.5	Tetratricopeptide repeat (TPR)-like superfamily protein	1	1	818	0	0	0
2601	AT1G13635.1	DNA glycosylase superfamily protein	1	1	311	0	0	25
2602	AT1G13635.2	DNA glycosylase superfamily protein	1	1	311	0	0	25
2603	AT1G13640.1	Phosphatidylinositol 3- and 4-kinase family protein	2	3	622	0	0	216
2604	AT1G13640.2	Phosphatidylinositol 3- and 4-kinase family protein	2	3	622	0	0	216
2605	AT1G13650.1	hypothetical protein	2	2	286	0	0	0
2606	AT1G13650.2	hypothetical protein	2	2	286	0	0	0
2607	AT1G13650.3	hypothetical protein	2	2	281	0	0	0
2608	AT1G13650.4	hypothetical protein	2	2	281	0	0	0
2615	AT1G13710.1	cytochrome P450%2C family 78%2C subfamily A%2C polypeptide 5	2	3	517	0	0	7
2616	AT1G13730.1	Nuclear transport factor 2 (NTF2) family protein with RNA binding (RRM-RBD-RNP motifs) domain-containing protein	2	2	428	0	0	121
2617	AT1G13730.2	Nuclear transport factor 2 (NTF2) family protein with RNA binding (RRM-RBD-RNP motifs) domain-containing protein	2	2	428	0	0	121
2618	AT1G13740.1	ABI five binding protein 2	1	1	348	0	0	0
2619	AT1G13750.1	Purple acid phosphatases superfamily protein	1	2	613	0	0	0
2626	AT1G13780.1	F-box/RNI-like/FBD-like domains-containing protein	1	1	456	0	0	81
2627	AT1G13780.2	F-box/RNI-like/FBD-like domains-containing protein	1	1	334	0	0	81
2628	AT1G13790.1	XH/XS domain-containing protein	1	1	736	0	0	82
2629	AT1G13790.2	XH/XS domain-containing protein	1	1	736	0	0	82
2638	AT1G13830.2	Carbohydrate-binding X8 domain superfamily protein	2	2	211	0	0	7
2639	AT1G13860.1	QUASIMODO2 LIKE 1	2	2	603	0	0	15
2640	AT1G13860.2	QUASIMODO2 LIKE 1	2	2	447	0	0	0
2641	AT1G13860.3	QUASIMODO2 LIKE 1	2	2	603	0	0	15
2642	AT1G13860.4	QUASIMODO2 LIKE 1	2	2	603	0	0	15
2643	AT1G13860.5	QUASIMODO2 LIKE 1	2	2	603	0	0	15
2644	AT1G13870.1	KTI12-like%2C chromatin associated protein	1	1	302	0	0	98
2645	AT1G13880.1	ELM2 domain-containing protein	1	1	424	0	0	212
2646	AT1G13880.2	ELM2 domain-containing protein	1	1	434	0	0	222
2647	AT1G13880.3	ELM2 domain-containing protein	1	1	425	0	0	213
2648	AT1G13890.1	soluble N-ethylmaleimide-sensitive factor adaptor protein 30	1	1	263	0	0	0
2649	AT1G13890.2	soluble N-ethylmaleimide-sensitive factor adaptor protein 30	1	1	263	0	0	0
2650	AT1G13900.1	Purple acid phosphatases superfamily protein	3	4	656	0	1	62
2663	AT1G13940.1	T-box transcription factor%2C putative (DUF863)	2	3	1005	0	0	0
2664	AT1G13940.2	T-box transcription factor%2C putative (DUF863)	2	3	1005	0	0	0
2668	AT1G13970.1	beta-hexosaminidase (DUF1336)	1	1	504	0	0	130
2669	AT1G13980.1	sec7 domain-containing protein	2	4	1451	0	0	1035
2670	AT1G13980.2	sec7 domain-containing protein	2	4	1451	0	0	1035
2671	AT1G13990.1	plant/protein	1	1	277	0	0	0
2672	AT1G13990.2	plant/protein	1	1	305	0	0	0
2673	AT1G13990.3	plant/protein	1	1	308	0	0	0
2674	AT1G14000.1	VH1-interacting kinase	2	3	438	0	0	0
2676	AT1G14020.1	O-fucosyltransferase family protein	1	1	499	0	0	293
2677	AT1G14030.1	Rubisco methyltransferase family protein	2	2	482	0	0	120
2678	AT1G14040.1	EXS (ERD1/XPR1/SYG1) family protein	2	3	813	0	1	286
2681	AT1G14080.1	fucosyltransferase 6	1	2	537	0	0	0
2682	AT1G14100.1	fucosyltransferase 8	1	1	516	0	0	244
2683	AT1G14110.1	fucosyltransferase 9	1	2	474	0	0	0
2684	AT1G14120.1	2-oxoglutarate (2OG) and Fe(II)-dependent oxygenase superfamily protein	1	1	312	0	0	0
2685	AT1G14120.2	2-oxoglutarate (2OG) and Fe(II)-dependent oxygenase superfamily protein	1	1	312	0	0	0
2686	AT1G14120.3	2-oxoglutarate (2OG) and Fe(II)-dependent oxygenase superfamily protein	1	1	312	0	0	0
2688	AT1G14140.1	Mitochondrial substrate carrier family protein	1	1	305	0	0	0
2691	AT1G14160.1	Uncharacterized protein family (UPF0497)	1	1	209	0	0	0
2692	AT1G14170.1	RNA-binding KH domain-containing protein	1	1	454	0	0	0
2693	AT1G14170.2	RNA-binding KH domain-containing protein	1	1	446	0	0	0
2694	AT1G14170.3	RNA-binding KH domain-containing protein	1	1	479	0	0	0
2695	AT1G14180.1	RING/U-box superfamily protein	1	1	348	0	1	0
2697	AT1G14185.1	Glucose-methanol-choline (GMC) oxidoreductase family protein	2	2	503	0	0	0
2698	AT1G14190.1	Glucose-methanol-choline (GMC) oxidoreductase family protein	4	4	501	0	0	0
2699	AT1G14190.2	Glucose-methanol-choline (GMC) oxidoreductase family protein	4	4	522	0	0	12
2703	AT1G14220.1	Ribonuclease T2 family protein	1	1	228	0	0	0
2704	AT1G14230.1	GDA1/CD39 nucleoside phosphatase family protein	3	4	503	0	1	75
2705	AT1G14240.1	GDA1/CD39 nucleoside phosphatase family protein	2	2	483	0	1	0
2706	AT1G14240.2	GDA1/CD39 nucleoside phosphatase family protein	2	2	483	0	1	0
2707	AT1G14240.3	GDA1/CD39 nucleoside phosphatase family protein	2	2	479	0	1	0
2708	AT1G14240.4	GDA1/CD39 nucleoside phosphatase family protein	2	2	483	0	1	0
2709	AT1G14250.1	GDA1/CD39 nucleoside phosphatase family protein	3	4	488	0	1	65
2717	AT1G14280.1	phytochrome kinase substrate 2	2	2	442	0	0	44
2725	AT1G14320.1	Ribosomal protein L16p/L10e family protein	1	1	220	0	0	0
2727	AT1G14330.1	Galactose oxidase/kelch repeat superfamily protein	2	2	441	0	0	48
2728	AT1G14340.1	RNA-binding (RRM/RBD/RNP motifs) family protein	1	1	244	0	0	0
2730	AT1G14350.1	Duplicated homeodomain-like superfamily protein	1	1	436	0	0	0
2731	AT1G14350.2	Duplicated homeodomain-like superfamily protein	1	1	436	0	0	0
2732	AT1G14350.3	Duplicated homeodomain-like superfamily protein	1	1	393	0	0	0
2733	AT1G14350.4	Duplicated homeodomain-like superfamily protein	1	1	393	0	0	0
2734	AT1G14360.1	UDP-galactose transporter 3	3	4	331	0	0	109
2735	AT1G14370.1	protein kinase 2A	3	4	426	0	0	39
2736	AT1G14380.1	IQ-domain 28	1	1	664	0	0	283
2737	AT1G14380.2	IQ-domain 28	1	1	602	0	0	221
2738	AT1G14380.3	IQ-domain 28	1	1	664	0	0	283
2739	AT1G14380.4	IQ-domain 28	1	1	664	0	0	283
2740	AT1G14380.5	IQ-domain 28	1	1	602	0	0	221
2741	AT1G14380.6	IQ-domain 28	1	1	602	0	0	221
2742	AT1G14380.7	IQ-domain 28	1	1	574	0	0	193
2743	AT1G14390.1	Leucine-rich repeat protein kinase family protein	2	3	728	0	0	423
2746	AT1G14410.1	ssDNA-binding transcriptional regulator	1	1	263	0	0	0
2747	AT1G14420.1	Pectate lyase family protein	4	4	459	0	0	125
2748	AT1G14430.1	glyoxal oxidase-related protein	1	1	564	0	0	286
2749	AT1G14440.1	homeobox protein 31	1	1	312	0	0	0
2750	AT1G14440.2	homeobox protein 31	1	1	312	0	0	0
2755	AT1G14460.1	AAA-type ATPase family protein	1	3	1116	0	0	0
2756	AT1G14470.1	Pentatricopeptide repeat (PPR) superfamily protein	1	1	540	0	0	0
2757	AT1G14480.1	Ankyrin repeat family protein	1	1	441	0	0	0
2758	AT1G14480.2	Ankyrin repeat family protein	1	1	398	0	0	0
2762	AT1G14510.1	alfin-like 7	3	3	252	0	2	0
2763	AT1G14520.1	myo-inositol oxygenase 1	2	2	311	0	0	0
2764	AT1G14520.2	myo-inositol oxygenase 1	2	2	309	0	0	0
2765	AT1G14520.3	myo-inositol oxygenase 1	2	2	341	0	0	0
2766	AT1G14520.4	myo-inositol oxygenase 1	2	2	311	0	0	0
2769	AT1G14540.1	Peroxidase superfamily protein	1	1	315	0	0	64
2770	AT1G14550.1	Peroxidase superfamily protein	1	1	321	0	0	70
2771	AT1G14560.1	Mitochondrial substrate carrier family protein	1	1	331	1	0	41
2772	AT1G14560.2	Mitochondrial substrate carrier family protein	1	1	308	1	0	41
2773	AT1G14560.3	Mitochondrial substrate carrier family protein	1	1	233	1	0	0
2778	AT1G14580.1	C2H2-like zinc finger protein	2	2	467	0	0	180
2779	AT1G14580.2	C2H2-like zinc finger protein	2	2	467	0	0	180
2780	AT1G14580.3	C2H2-like zinc finger protein	2	2	481	0	0	194
2781	AT1G14580.4	C2H2-like zinc finger protein	3	3	336	0	0	49
2782	AT1G14590.1	Nucleotide-diphospho-sugar transferase family protein	1	1	386	0	0	99
2784	AT1G14610.1	valyl-tRNA synthetase / valine-tRNA ligase (VALRS)	2	2	1108	0	0	218
2785	AT1G14620.1	decoy	2	2	233	0	0	0
2786	AT1G14620.2	decoy	2	2	220	0	0	0
2787	AT1G14630.1	XRI1-like protein	1	1	226	0	0	0
2789	AT1G14640.1	SWAP (Suppressor-of-White-APricot)/surp domain-containing protein	1	2	735	0	0	0
2790	AT1G14640.2	SWAP (Suppressor-of-White-APricot)/surp domain-containing protein	1	2	735	0	0	0
2792	AT1G14650.1	SWAP (Suppressor-of-White-APricot)/surp domain-containing protein / ubiquitin family protein	1	1	785	0	0	277
2793	AT1G14650.2	SWAP (Suppressor-of-White-APricot)/surp domain-containing protein / ubiquitin family protein	1	1	785	0	0	277
2794	AT1G14650.3	SWAP (Suppressor-of-White-APricot)/surp domain-containing protein / ubiquitin family protein	1	1	785	0	0	277
2795	AT1G14660.1	Na+/H+ exchanger 8	2	2	756	0	0	42
2796	AT1G14660.2	Na+/H+ exchanger 8	2	2	733	0	0	42
2797	AT1G14670.1	Endomembrane protein 70 protein family	2	2	592	0	1	357
2798	AT1G14680.1	early endosome antigen	1	1	290	0	0	0
2799	AT1G14685.1	basic pentacysteine 2	1	1	279	0	1	58
2800	AT1G14685.2	basic pentacysteine 2	1	1	279	0	1	58
2801	AT1G14685.3	basic pentacysteine 2	1	1	279	0	1	58
2802	AT1G14685.4	basic pentacysteine 2	1	1	279	0	1	58
2803	AT1G14686.1	ENTH/ANTH/VHS superfamily protein	1	1	339	0	0	0
2806	AT1G14690.1	microtubule-associated protein 65-7	1	1	603	0	0	10
2807	AT1G14690.2	microtubule-associated protein 65-7	1	1	603	0	0	10
2808	AT1G14700.1	purple acid phosphatase 3	1	1	366	0	0	148
2809	AT1G14700.2	purple acid phosphatase 3	1	1	364	0	0	146
2810	AT1G14700.3	purple acid phosphatase 3	1	1	270	0	0	52
2812	AT1G14710.1	hydroxyproline-rich glycoprotein family protein	2	4	601	0	0	197
2813	AT1G14710.2	hydroxyproline-rich glycoprotein family protein	2	4	601	0	0	197
2814	AT1G14720.1	xyloglucan endotransglucosylase/hydrolase 28	1	2	332	0	0	0
2815	AT1G14730.1	Cytochrome b561/ferric reductase transmembrane protein family	3	3	224	0	0	11
2816	AT1G14740.1	class I heat shock protein%2C putative (DUF1423)	1	1	733	0	0	305
2817	AT1G14750.1	Cyclin family protein	2	2	578	0	0	130
2818	AT1G14750.2	Cyclin family protein	1	1	410	0	0	0
2819	AT1G14750.3	Cyclin family protein	2	2	619	0	0	130
2820	AT1G14750.4	Cyclin family protein	1	1	409	0	0	0
2827	AT1G14780.1	MAC/Perforin domain-containing protein	2	3	627	0	0	0
40089	AT5G17250.1	Alkaline-phosphatase-like family protein	4	9	946	0	1	693
2829	AT1G14800.1	Nucleic acid-binding%2C OB-fold-like protein	1	1	384	0	0	150
2830	AT1G14810.1	semialdehyde dehydrogenase family protein	2	3	375	0	0	29
2831	AT1G14810.2	semialdehyde dehydrogenase family protein	2	2	306	0	0	29
2835	AT1G14830.1	DYNAMIN-like 1C	1	1	614	0	0	9
2838	AT1G14850.1	nucleoporin 155	2	4	1464	0	1	196
40698	AT5G20480.1	EF-TU receptor	4	9	1031	0	0	238
40699	AT5G20480.2	EF-TU receptor	4	9	1031	0	0	238
2847	AT1G14920.1	GRAS family transcription factor family protein	1	1	533	0	0	274
2853	AT1G14970.1	O-fucosyltransferase family protein	1	2	562	0	0	6
2854	AT1G14970.2	O-fucosyltransferase family protein	1	2	442	0	0	0
2855	AT1G14970.3	O-fucosyltransferase family protein	1	2	416	0	0	0
2860	AT1G15000.1	serine carboxypeptidase-like 50	1	2	444	1	0	0
2863	AT1G15020.1	quiescin-sulfhydryl oxidase 1	1	1	502	0	0	282
2864	AT1G15020.2	quiescin-sulfhydryl oxidase 1	1	1	528	0	0	282
2865	AT1G15020.3	quiescin-sulfhydryl oxidase 1	1	1	502	0	0	282
2866	AT1G15030.1	hypothetical protein (DUF789)	2	2	360	0	0	126
2875	AT1G15080.1	lipid phosphate phosphatase 2	1	1	290	0	0	28
2878	AT1G15110.1	phosphatidyl serine synthase family protein	3	3	425	0	0	182
2879	AT1G15110.2	phosphatidyl serine synthase family protein	3	3	453	0	0	182
2880	AT1G15110.3	phosphatidyl serine synthase family protein	3	3	425	0	0	182
2881	AT1G15110.4	phosphatidyl serine synthase family protein	3	3	425	0	0	182
2884	AT1G15125.1	S-adenosyl-L-methionine-dependent methyltransferases superfamily protein	1	2	351	0	0	0
2885	AT1G15125.2	S-adenosyl-L-methionine-dependent methyltransferases superfamily protein	1	1	248	0	0	0
2886	AT1G15130.1	Endosomal targeting BRO1-like domain-containing protein	1	1	846	0	0	285
2887	AT1G15140.1	FAD/NAD(P)-binding oxidoreductase	1	1	295	0	0	0
2888	AT1G15140.2	FAD/NAD(P)-binding oxidoreductase	1	1	271	0	0	0
2889	AT1G15140.3	FAD/NAD(P)-binding oxidoreductase	1	1	271	0	0	0
2890	AT1G15150.1	MATE efflux family protein	2	2	487	0	0	213
2891	AT1G15150.2	MATE efflux family protein	2	2	371	0	0	97
2892	AT1G15160.1	MATE efflux family protein	1	1	487	0	0	213
2893	AT1G15165.1	RING/FYVE/PHD zinc finger superfamily protein	2	2	329	0	0	0
2894	AT1G15170.1	MATE efflux family protein	1	1	481	0	0	164
2895	AT1G15170.2	MATE efflux family protein	1	1	362	0	0	45
2896	AT1G15180.1	MATE efflux family protein	1	1	482	0	0	165
2897	AT1G15180.2	MATE efflux family protein	1	1	410	0	0	45
2901	AT1G15200.3	protein-protein interaction regulator family protein	1	1	470	0	1	79
2902	AT1G15200.4	protein-protein interaction regulator family protein	1	1	442	0	1	79
2903	AT1G15210.1	pleiotropic drug resistance 7	1	1	1442	0	0	237
2912	AT1G15240.2	phox (PX) domain-containing protein	1	1	1020	0	0	814
2920	AT1G15280.1	CASC3/Barentsz eIF4AIII binding protein	2	2	584	0	0	280
2921	AT1G15280.2	CASC3/Barentsz eIF4AIII binding protein	2	2	585	0	0	281
44139	AT5G46510.1	Disease resistance protein (TIR-NBS-LRR class) family	3	9	1353	0	0	192
44140	AT5G46510.2	Disease resistance protein (TIR-NBS-LRR class) family	3	9	1310	0	0	192
2924	AT1G15310.1	signal recognition particle 54 kDa subunit	1	2	479	0	0	0
2925	AT1G15320.1	seed dormancy control protein	2	2	307	0	0	84
2926	AT1G15320.2	seed dormancy control protein	2	2	289	0	0	66
2953	AT1G15440.1	periodic tryptophan protein 2	3	3	900	0	0	164
2954	AT1G15440.2	periodic tryptophan protein 2	2	2	860	0	0	124
48355	ATMG01360.1	cytochrome oxidase	5	9	527	0	1	222
9	AT1G01040.1	dicer-like 1	4	8	1909	0	1	955
10	AT1G01040.2	dicer-like 1	4	8	1910	0	1	956
2958	AT1G15460.4	HCO3- transporter family	3	4	577	0	2	0
2959	AT1G15470.1	Transducin/WD40 repeat-like superfamily protein	1	1	333	0	0	14
2960	AT1G15470.2	Transducin/WD40 repeat-like superfamily protein	1	1	282	0	0	14
2961	AT1G15480.1	Tetratricopeptide repeat (TPR)-like superfamily protein	1	2	594	0	0	0
2962	AT1G15490.1	alpha/beta-Hydrolases superfamily protein	3	3	648	0	1	176
2963	AT1G15490.2	alpha/beta-Hydrolases superfamily protein	3	3	577	0	1	105
2964	AT1G15490.3	alpha/beta-Hydrolases superfamily protein	3	3	552	0	1	176
2965	AT1G15490.4	alpha/beta-Hydrolases superfamily protein	3	3	496	0	1	24
180	AT1G01790.1	K+ efflux antiporter 1	4	8	1193	0	0	844
2967	AT1G15510.1	Tetratricopeptide repeat (TPR)-like superfamily protein	3	4	866	0	0	0
181	AT1G01790.2	K+ efflux antiporter 1	4	8	1193	0	0	844
749	AT1G04700.1	PB1 domain-containing protein tyrosine kinase	4	8	1042	0	1	762
750	AT1G04700.2	PB1 domain-containing protein tyrosine kinase	4	8	1042	0	1	762
2975	AT1G15550.1	gibberellin 3-oxidase 1	1	1	358	0	0	0
2983	AT1G15620.1	transmembrane protein	1	1	245	0	0	29
2986	AT1G15640.1	transmembrane protein	1	1	255	0	0	37
2990	AT1G15680.1	F-box family protein	1	2	410	0	0	0
4096	AT1G21660.1	Chaperone DnaJ-domain superfamily protein	6	8	523	0	0	0
4573	AT1G24300.1	GYF domain-containing protein	3	8	1495	0	0	830
4574	AT1G24300.2	GYF domain-containing protein	3	8	1490	0	0	825
2995	AT1G15720.1	TRF-like 5	1	1	390	0	0	0
2996	AT1G15730.1	Cobalamin biosynthesis CobW-like protein	1	1	448	0	0	0
2997	AT1G15740.1	Leucine-rich repeat family protein	1	1	585	0	0	263
2998	AT1G15750.1	Transducin family protein / WD-40 repeat family protein	1	1	1131	0	0	233
2999	AT1G15750.2	Transducin family protein / WD-40 repeat family protein	1	1	1131	0	0	233
3000	AT1G15750.3	Transducin family protein / WD-40 repeat family protein	1	1	1131	0	0	233
3001	AT1G15750.4	Transducin family protein / WD-40 repeat family protein	1	1	1131	0	0	233
3004	AT1G15770.1	mediator of RNA polymerase II transcription subunit	1	1	293	0	0	39
3009	AT1G15780.1	mediator of RNA polymerase II transcription subunit 15a-like protein	1	1	1335	0	0	1117
3011	AT1G15780.3	mediator of RNA polymerase II transcription subunit 15a-like protein	1	1	1357	0	0	1139
3019	AT1G15820.1	light harvesting complex photosystem II subunit 6	2	2	258	0	1	0
3029	AT1G15870.1	Mitochondrial glycoprotein family protein	2	2	242	0	0	0
3030	AT1G15880.1	golgi snare 11	1	1	223	0	0	0
3032	AT1G15890.1	Disease resistance protein (CC-NBS-LRR class) family	1	3	851	0	0	0
3033	AT1G15890.2	Disease resistance protein (CC-NBS-LRR class) family	1	2	691	0	0	129
3036	AT1G15920.1	Polynucleotidyl transferase%2C ribonuclease H-like superfamily protein	2	2	286	0	1	74
3037	AT1G15920.2	Polynucleotidyl transferase%2C ribonuclease H-like superfamily protein	2	2	286	0	1	74
3052	AT1G15990.1	cyclic nucleotide gated channel 7	2	2	738	0	0	0
3054	AT1G16010.1	magnesium transporter 2	2	2	442	0	0	198
3055	AT1G16010.2	magnesium transporter 2	2	2	442	0	0	198
3056	AT1G16010.3	magnesium transporter 2	2	2	442	0	0	198
3064	AT1G16040.1	phosphatidylinositol-glycan biosynthesis class F-like protein	2	2	226	0	0	0
3066	AT1G16040.3	phosphatidylinositol-glycan biosynthesis class F-like protein	2	2	215	0	0	0
3068	AT1G16060.1	ARIA-interacting double AP2 domain protein	3	3	345	0	0	128
3069	AT1G16060.2	ARIA-interacting double AP2 domain protein	3	3	211	0	0	0
3070	AT1G16060.3	ARIA-interacting double AP2 domain protein	3	3	275	0	0	58
3071	AT1G16060.4	ARIA-interacting double AP2 domain protein	3	3	211	0	0	0
3072	AT1G16060.5	ARIA-interacting double AP2 domain protein	3	3	211	0	0	0
3073	AT1G16060.6	ARIA-interacting double AP2 domain protein	3	3	211	0	0	0
3075	AT1G16070.1	tubby like protein 8	1	1	397	0	0	0
3076	AT1G16070.2	tubby like protein 8	1	1	367	0	0	0
3077	AT1G16070.3	tubby like protein 8	1	1	292	0	0	0
3079	AT1G16090.1	wall associated kinase-like 7	3	3	317	0	0	0
3080	AT1G16110.1	wall associated kinase-like 6	3	4	642	0	1	422
3081	AT1G16120.1	wall associated kinase-like 1	3	4	730	0	1	417
4575	AT1G24300.3	GYF domain-containing protein	3	8	1344	0	0	825
6338	AT1G35710.1	kinase family with leucine-rich repeat domain-containing protein	3	8	1120	0	0	331
3084	AT1G16160.1	wall associated kinase-like 5	3	4	731	0	1	420
3086	AT1G16180.1	Serinc-domain containing serine and sphingolipid biosynthesis protein	1	1	412	0	0	0
3087	AT1G16180.2	Serinc-domain containing serine and sphingolipid biosynthesis protein	1	1	412	0	0	0
3091	AT1G16220.1	Protein phosphatase 2C family protein	2	2	491	0	0	89
3093	AT1G16225.2	Target SNARE coiled-coil domain protein	2	2	223	0	0	17
3096	AT1G16240.1	syntaxin of plants 51	1	1	232	0	0	0
3097	AT1G16240.2	syntaxin of plants 51	1	1	232	0	0	0
3098	AT1G16240.3	syntaxin of plants 51	1	1	228	0	0	0
3099	AT1G16240.4	syntaxin of plants 51	1	1	232	0	0	0
3100	AT1G16250.1	Galactose oxidase/kelch repeat superfamily protein	1	1	383	0	0	109
3101	AT1G16250.2	Galactose oxidase/kelch repeat superfamily protein	1	1	383	0	0	109
3102	AT1G16260.1	Wall-associated kinase family protein	2	4	720	0	0	378
3103	AT1G16260.2	Wall-associated kinase family protein	2	4	720	0	0	378
3104	AT1G16260.3	Wall-associated kinase family protein	2	4	711	0	0	369
6841	AT1G47890.1	receptor like protein 7	3	8	1019	0	0	5
7479	AT1G51530.2	RNA-binding (RRM/RBD/RNP motifs) family protein	7	8	403	0	0	0
7713	AT1G52780.1	PII%2C uridylyltransferase (DUF2921)	4	8	1059	0	1	433
3109	AT1G16290.1	transglycosylase	1	2	419	0	0	0
3110	AT1G16290.2	transglycosylase	1	2	428	0	0	0
3111	AT1G16300.1	glyceraldehyde-3-phosphate dehydrogenase of plastid 2	2	2	420	0	0	51
3112	AT1G16310.1	Cation efflux family protein	1	2	428	0	0	0
3113	AT1G16310.2	Cation efflux family protein	1	1	315	0	0	58
3116	AT1G16340.1	Aldolase superfamily protein	1	1	291	0	0	0
3117	AT1G16340.2	Aldolase superfamily protein	1	1	291	0	0	0
3118	AT1G16340.3	Aldolase superfamily protein	1	1	291	0	0	0
3119	AT1G16340.4	Aldolase superfamily protein	1	1	293	0	0	0
3120	AT1G16350.1	Aldolase-type TIM barrel family protein	1	1	502	0	0	0
3121	AT1G16360.1	LEM3 (ligand-effect modulator 3) family protein / CDC50 family protein	1	1	336	0	0	0
3122	AT1G16360.2	LEM3 (ligand-effect modulator 3) family protein / CDC50 family protein	1	1	350	0	0	11
3123	AT1G16360.3	LEM3 (ligand-effect modulator 3) family protein / CDC50 family protein	1	1	238	0	0	0
3124	AT1G16360.4	LEM3 (ligand-effect modulator 3) family protein / CDC50 family protein	1	1	339	0	0	0
3125	AT1G16360.5	LEM3 (ligand-effect modulator 3) family protein / CDC50 family protein	1	1	238	0	0	0
3126	AT1G16370.1	organic cation/carnitine transporter 6	2	4	521	0	0	0
3127	AT1G16380.1	Cation/hydrogen exchanger family protein	2	3	785	0	0	304
7827	AT1G53420.1	Leucine-rich repeat transmembrane protein kinase	5	8	953	0	0	613
3129	AT1G16400.1	cytochrome P450%2C family 79%2C subfamily F%2C polypeptide 2	1	2	537	0	0	4
3130	AT1G16410.1	cytochrome p450 79f1	1	2	538	0	0	5
3131	AT1G16410.2	cytochrome p450 79f1	1	1	423	0	0	5
3132	AT1G16420.1	metacaspase 8	1	1	381	0	0	62
3134	AT1G16440.1	root hair specific 3	1	1	499	0	0	163
3135	AT1G16445.1	S-adenosyl-L-methionine-dependent methyltransferases superfamily protein	2	2	274	0	0	42
3136	AT1G16460.1	rhodanese homologue 2	1	1	318	0	0	0
3137	AT1G16460.2	rhodanese homologue 2	2	2	342	0	0	0
3138	AT1G16460.3	rhodanese homologue 2	1	1	318	0	0	0
3139	AT1G16460.4	rhodanese homologue 2	1	1	318	0	0	0
3140	AT1G16460.5	rhodanese homologue 2	2	2	290	0	0	0
3141	AT1G16460.6	rhodanese homologue 2	1	1	266	0	0	0
3142	AT1G16470.1	proteasome subunit PAB1	1	1	235	0	0	0
3143	AT1G16470.2	proteasome subunit PAB1	1	1	235	0	0	0
3144	AT1G16480.1	Tetratricopeptide repeat (TPR)-like superfamily protein	2	4	937	0	0	497
3145	AT1G16480.2	Tetratricopeptide repeat (TPR)-like superfamily protein	2	4	928	1	0	480
3146	AT1G16490.1	myb domain protein 58	1	1	274	0	0	0
3147	AT1G16490.2	myb domain protein 58	1	1	205	0	0	0
3152	AT1G16520.1	interactor of constitutive active ROPs protein	1	1	325	0	0	106
8209	AT1G55325.1	RNA polymerase II transcription mediator	4	8	1921	0	0	324
8210	AT1G55325.2	RNA polymerase II transcription mediator	4	8	2001	0	1	314
8211	AT1G55325.3	RNA polymerase II transcription mediator	4	8	1906	0	1	314
3166	AT1G16570.1	UDP-Glycosyltransferase superfamily protein	2	3	465	0	0	73
3167	AT1G16570.2	UDP-Glycosyltransferase superfamily protein	2	3	496	0	0	73
3170	AT1G16610.1	arginine/serine-rich 45	2	2	414	0	0	0
3171	AT1G16610.2	arginine/serine-rich 45	2	2	407	0	0	0
3172	AT1G16610.3	arginine/serine-rich 45	2	2	425	0	0	0
3173	AT1G16610.4	arginine/serine-rich 45	2	2	381	0	0	0
3174	AT1G16610.5	arginine/serine-rich 45	2	2	383	0	0	0
3175	AT1G16610.6	arginine/serine-rich 45	2	2	388	0	0	0
3176	AT1G16610.7	arginine/serine-rich 45	2	2	388	0	0	0
3177	AT1G16630.1	transmembrane protein	1	1	845	0	0	449
3182	AT1G16670.1	Protein kinase superfamily protein	3	3	390	0	0	32
3183	AT1G16680.1	Chaperone DnaJ-domain superfamily protein	3	3	554	1	0	0
3184	AT1G16690.1	Enhancer of polycomb-like transcription factor protein	1	1	439	0	0	115
3189	AT1G16710.1	histone acetyltransferase of the CBP family 12	2	3	1706	0	0	997
3190	AT1G16710.10	histone acetyltransferase of the CBP family 12	2	3	1680	0	0	971
3191	AT1G16710.2	histone acetyltransferase of the CBP family 12	2	3	1677	0	0	968
3192	AT1G16710.3	histone acetyltransferase of the CBP family 12	2	3	1680	0	0	971
3193	AT1G16710.4	histone acetyltransferase of the CBP family 12	2	3	1641	0	0	932
3194	AT1G16710.5	histone acetyltransferase of the CBP family 12	2	3	1641	0	0	932
3195	AT1G16710.6	histone acetyltransferase of the CBP family 12	2	3	1641	0	0	932
3196	AT1G16710.7	histone acetyltransferase of the CBP family 12	2	3	1680	0	0	971
3197	AT1G16710.8	histone acetyltransferase of the CBP family 12	2	3	1680	0	0	971
3198	AT1G16710.9	histone acetyltransferase of the CBP family 12	2	3	1470	0	0	971
3199	AT1G16720.1	high chlorophyll fluorescence phenotype 173	1	1	598	0	0	0
3200	AT1G16720.2	high chlorophyll fluorescence phenotype 173	1	1	631	0	0	0
3201	AT1G16720.3	high chlorophyll fluorescence phenotype 173	1	1	564	0	0	0
3208	AT1G16770.1	hypothetical protein	3	3	324	0	0	110
3209	AT1G16770.2	hypothetical protein	3	3	276	0	0	62
3210	AT1G16770.3	hypothetical protein	3	3	212	0	0	0
8212	AT1G55325.4	RNA polymerase II transcription mediator	4	8	1906	0	1	314
10844	AT1G71140.1	MATE efflux family protein	5	8	485	0	2	156
11382	AT1G74190.1	receptor like protein 15	6	8	965	0	2	683
12718	AT2G01320.1	ABC-2 type transporter family protein	4	8	725	0	0	307
12719	AT2G01320.2	ABC-2 type transporter family protein	4	8	727	0	0	307
12720	AT2G01320.3	ABC-2 type transporter family protein	4	8	728	0	0	307
3227	AT1G16830.1	Pentatricopeptide repeat (PPR) superfamily protein	2	2	608	0	0	16
3235	AT1G16870.1	mitochondrial 28S ribosomal protein S29-like protein	1	1	480	0	0	0
3236	AT1G16880.1	uridylyltransferase-like protein	3	3	290	0	0	0
3237	AT1G16880.2	uridylyltransferase-like protein	3	3	213	0	0	0
3241	AT1G16900.1	Alg9-like mannosyltransferase family	1	2	570	0	0	0
3242	AT1G16905.1	Curculin-like (mannose-binding) lectin family protein	2	3	423	0	0	0
3250	AT1G16940.1	F-box/RNI-like/FBD-like domains-containing protein	2	2	434	0	0	220
3254	AT1G16970.1	ATP-dependent DNA helicase 2 subunit Ku70-like protein	1	1	621	0	0	0
3255	AT1G16980.1	trehalose-6-phosphate synthase	3	4	822	0	0	442
3256	AT1G16980.2	trehalose-6-phosphate synthase	2	3	662	0	0	318
3257	AT1G17000.1	trehalose-phosphatase/synthase 3	2	3	783	0	0	419
3258	AT1G17010.1	2-oxoglutarate (2OG) and Fe(II)-dependent oxygenase superfamily protein	2	2	361	0	0	6
3259	AT1G17020.1	senescence-related gene 1	1	1	358	0	0	0
3260	AT1G17030.1	hypothetical protein	1	2	502	0	0	0
3264	AT1G17050.1	solanesyl diphosphate synthase 2	2	3	417	0	1	2
3265	AT1G17060.1	cytochrome p450 72c1	1	1	313	0	0	16
3266	AT1G17065.1	hypothetical protein	1	1	253	0	0	0
3267	AT1G17070.1	GC-rich sequence DNA-binding factor-like protein with Tuftelin interacting domain-containing protein	1	2	849	0	0	108
3275	AT1G17110.1	ubiquitin-specific protease 15	2	3	924	0	0	131
3276	AT1G17110.2	ubiquitin-specific protease 15	2	3	928	0	0	131
3277	AT1G17110.3	ubiquitin-specific protease 15	2	3	924	0	0	131
3278	AT1G17120.1	cationic amino acid transporter 8	2	2	590	0	0	0
3279	AT1G17130.1	coiled-coil protein (DUF572)	1	1	331	0	0	0
3280	AT1G17130.2	coiled-coil protein (DUF572)	1	1	338	0	0	7
3281	AT1G17140.1	interactor of constitutive active rops 1	1	1	344	0	0	135
3282	AT1G17140.2	interactor of constitutive active rops 1	1	1	344	0	0	135
3286	AT1G17150.1	Pectin lyase-like superfamily protein	2	2	402	0	0	0
3289	AT1G17170.1	glutathione S-transferase TAU 24	4	4	218	0	0	0
3290	AT1G17180.1	glutathione S-transferase TAU 25	4	4	221	0	0	0
3291	AT1G17190.1	glutathione S-transferase tau 26	3	4	220	0	0	0
3292	AT1G17200.1	Uncharacterized protein family (UPF0497)	2	2	204	0	0	3
3295	AT1G17220.1	Translation initiation factor 2%2C small GTP-binding protein	2	3	1026	0	0	518
12721	AT2G01320.4	ABC-2 type transporter family protein	4	8	725	0	0	307
12722	AT2G01320.5	ABC-2 type transporter family protein	4	8	648	0	0	307
3298	AT1G17230.3	Leucine-rich receptor-like protein kinase family protein	2	4	973	0	0	128
3300	AT1G17240.1	receptor like protein 2	1	2	729	0	0	0
3301	AT1G17240.2	receptor like protein 2	1	2	734	0	0	0
3303	AT1G17260.1	autoinhibited H[+]-ATPase isoform 10	2	2	947	0	0	29
3306	AT1G17280.1	ubiquitin-conjugating enzyme 34	1	1	237	0	0	27
3307	AT1G17280.2	ubiquitin-conjugating enzyme 34	1	1	237	0	0	27
3308	AT1G17280.3	ubiquitin-conjugating enzyme 34	1	1	237	0	0	27
3309	AT1G17280.4	ubiquitin-conjugating enzyme 34	1	1	243	0	0	33
3310	AT1G17280.5	ubiquitin-conjugating enzyme 34	1	1	237	0	0	27
3311	AT1G17280.6	ubiquitin-conjugating enzyme 34	1	1	237	0	0	27
3312	AT1G17280.7	ubiquitin-conjugating enzyme 34	1	1	237	0	0	27
3313	AT1G17280.8	ubiquitin-conjugating enzyme 34	1	1	237	0	0	27
3314	AT1G17280.9	ubiquitin-conjugating enzyme 34	1	1	237	0	0	27
3320	AT1G17310.1	MADS-box transcription factor family protein	1	1	217	0	0	0
3321	AT1G17310.2	MADS-box transcription factor family protein	1	1	228	0	0	0
3322	AT1G17330.1	Metal-dependent phosphohydrolase	2	2	222	0	1	0
3330	AT1G17360.1	LOW protein: protein phosphatase 1 regulatory subunit-like protein	1	3	1061	0	0	0
3331	AT1G17370.1	oligouridylate binding protein 1B	3	3	419	0	0	100
3332	AT1G17370.2	oligouridylate binding protein 1B	3	3	416	0	0	97
3333	AT1G17380.1	jasmonate-zim-domain protein 5	2	2	274	0	0	0
3334	AT1G17380.2	jasmonate-zim-domain protein 5	1	1	245	0	0	0
3335	AT1G17380.3	jasmonate-zim-domain protein 5	2	2	219	0	0	0
3336	AT1G17400.1	hypothetical protein	2	2	295	0	0	0
3337	AT1G17400.2	hypothetical protein	2	2	295	0	0	0
3338	AT1G17400.3	hypothetical protein	2	2	231	0	0	0
3342	AT1G17420.1	lipoxygenase 3	2	3	919	0	0	162
3343	AT1G17430.1	alpha/beta-Hydrolases superfamily protein	1	1	332	0	0	0
3344	AT1G17440.1	Transcription initiation factor TFIID subunit A	1	1	683	0	0	10
3345	AT1G17440.2	Transcription initiation factor TFIID subunit A	1	1	683	0	0	10
12725	AT2G01320.8	ABC-2 type transporter family protein	4	8	648	0	0	307
13238	AT2G04170.1	TRAF-like family protein	7	8	420	0	0	0
13239	AT2G04170.2	TRAF-like family protein	7	8	420	0	0	0
3351	AT1G17460.1	TRF-like 3	2	3	604	0	0	102
3352	AT1G17460.2	TRF-like 3	2	3	624	0	0	122
3353	AT1G17460.3	TRF-like 3	2	3	583	0	0	81
3358	AT1G17500.1	ATPase E1-E2 type family protein / haloacid dehalogenase-like hydrolase family protein	2	4	1216	0	0	366
3359	AT1G17500.2	ATPase E1-E2 type family protein / haloacid dehalogenase-like hydrolase family protein	2	4	1216	0	0	366
3367	AT1G17540.1	kinase with adenine nucleotide alpha hydrolases-like domain-containing protein	1	2	728	0	0	0
3369	AT1G17550.1	homology to ABI2	1	1	511	0	0	39
3370	AT1G17550.2	homology to ABI2	1	1	511	0	0	39
13242	AT2G04170.5	TRAF-like family protein	7	8	369	0	0	0
3374	AT1G17590.1	nuclear factor Y%2C subunit A8	2	2	328	0	0	89
3375	AT1G17590.2	nuclear factor Y%2C subunit A8	2	2	328	0	0	89
3376	AT1G17590.3	nuclear factor Y%2C subunit A8	2	2	328	0	0	89
3377	AT1G17590.4	nuclear factor Y%2C subunit A8	2	2	328	0	0	89
3378	AT1G17600.1	Disease resistance protein (TIR-NBS-LRR class) family	1	1	1049	0	0	114
3379	AT1G17610.1	Disease resistance protein (TIR-NBS class)	1	2	420	0	0	0
3380	AT1G17610.2	Disease resistance protein (TIR-NBS class)	1	2	420	0	0	0
3381	AT1G17615.1	Disease resistance protein (TIR-NBS class)	2	2	380	0	0	135
3383	AT1G17630.1	Pentatricopeptide repeat (PPR-like) superfamily protein	1	2	731	0	0	0
3384	AT1G17630.2	Pentatricopeptide repeat (PPR-like) superfamily protein	1	2	731	0	0	0
3385	AT1G17640.1	RNA-binding (RRM/RBD/RNP motifs) family protein	4	4	369	0	0	1
3386	AT1G17640.2	RNA-binding (RRM/RBD/RNP motifs) family protein	4	4	369	0	0	1
3387	AT1G17640.3	RNA-binding (RRM/RBD/RNP motifs) family protein	4	4	369	0	0	1
3388	AT1G17650.1	glyoxylate reductase 2	1	1	358	0	0	0
3389	AT1G17650.2	glyoxylate reductase 2	1	1	299	0	0	0
3394	AT1G17690.1	U3 small nucleolar RNA-associated protein	3	3	754	0	0	354
3397	AT1G17710.2	Pyridoxal phosphate phosphatase-related protein	1	1	247	0	0	0
3398	AT1G17720.1	Protein phosphatase 2A%2C regulatory subunit PR55	1	2	501	0	0	0
3399	AT1G17720.2	Protein phosphatase 2A%2C regulatory subunit PR55	1	2	500	0	0	0
3402	AT1G17745.1	D-3-phosphoglycerate dehydrogenase	2	3	624	0	0	30
3403	AT1G17745.2	D-3-phosphoglycerate dehydrogenase	2	3	651	0	0	57
13244	AT2G04170.7	TRAF-like family protein	7	8	316	0	0	0
3406	AT1G17770.1	histone-lysine N-methyltransferase%2C H3 lysine-9 specific SUVH3-like protein	1	1	693	0	0	210
3408	AT1G17780.2	transmembrane protein	1	1	263	0	0	23
3409	AT1G17780.3	transmembrane protein	1	1	263	0	0	23
3410	AT1G17780.4	transmembrane protein	1	1	221	0	0	0
3411	AT1G17780.5	transmembrane protein	1	1	221	0	0	0
3412	AT1G17780.6	transmembrane protein	1	1	263	0	0	23
3413	AT1G17790.1	DNA-binding bromodomain-containing protein	1	1	487	0	0	207
3415	AT1G17810.1	beta-tonoplast intrinsic protein	1	2	267	0	0	0
3416	AT1G17820.1	testis-expressed sequence 2-like protein (DUF2404)	1	1	803	0	0	345
3417	AT1G17830.1	hypothetical protein (DUF789)	1	1	337	0	0	84
3418	AT1G17840.1	white-brown complex-like protein	3	4	703	0	1	242
3419	AT1G17850.1	Rhodanese/Cell cycle control phosphatase superfamily protein	1	1	446	0	0	55
3420	AT1G17850.2	Rhodanese/Cell cycle control phosphatase superfamily protein	1	1	448	0	0	57
14033	AT2G15420.1	myosin heavy chain-like protein	6	8	957	0	0	91
3427	AT1G17910.1	Wall-associated kinase family protein	2	4	764	0	2	0
3428	AT1G17920.1	homeodomain GLABROUS 12	2	2	687	0	0	297
3429	AT1G17920.2	homeodomain GLABROUS 12	2	2	687	0	0	297
3430	AT1G17930.1	Aminotransferase-like%2C plant mobile domain family protein	1	2	478	0	0	0
3431	AT1G17930.2	Aminotransferase-like%2C plant mobile domain family protein	1	2	478	0	0	0
3432	AT1G17940.1	Endosomal targeting BRO1-like domain-containing protein	1	1	405	0	0	149
3434	AT1G17940.3	Endosomal targeting BRO1-like domain-containing protein	1	1	405	0	0	149
3436	AT1G17940.5	Endosomal targeting BRO1-like domain-containing protein	1	1	405	0	0	149
3437	AT1G17940.6	Endosomal targeting BRO1-like domain-containing protein	1	1	405	0	0	149
3438	AT1G17950.1	myb domain protein 52	1	1	249	0	0	0
3439	AT1G17960.1	Threonyl-tRNA synthetase	4	4	458	0	0	67
3440	AT1G17960.2	Threonyl-tRNA synthetase	3	3	385	0	0	0
3443	AT1G17980.1	poly(A) polymerase 1	3	4	713	0	2	0
3444	AT1G17980.2	poly(A) polymerase 1	1	1	586	0	1	310
3447	AT1G18000.1	Major facilitator superfamily protein	2	2	459	0	0	11
3448	AT1G18010.1	Major facilitator superfamily protein	2	2	459	0	0	11
3450	AT1G18030.1	Protein phosphatase 2C family protein	3	3	351	0	0	102
3451	AT1G18030.2	Protein phosphatase 2C family protein	2	2	305	0	0	71
3452	AT1G18040.1	cyclin-dependent kinase D1%3B3	4	4	391	0	0	27
3454	AT1G18060.1	microbial collagenase	1	1	226	0	0	0
3463	AT1G18140.1	laccase 1	3	3	581	0	0	299
3464	AT1G18150.1	Protein kinase superfamily protein	1	1	589	0	0	50
3465	AT1G18150.2	Protein kinase superfamily protein	1	1	589	0	0	50
3466	AT1G18150.3	Protein kinase superfamily protein	1	1	589	0	0	50
3467	AT1G18160.1	Protein kinase superfamily protein	2	3	992	0	0	761
3468	AT1G18160.2	Protein kinase superfamily protein	1	2	952	0	0	343
3469	AT1G18170.1	FKBP-like peptidyl-prolyl cis-trans isomerase family protein	4	4	247	0	0	15
3470	AT1G18180.1	3-oxo-5-alpha-steroid 4-dehydrogenase (DUF1295)	1	1	305	0	0	0
3471	AT1G18180.2	3-oxo-5-alpha-steroid 4-dehydrogenase (DUF1295)	1	1	291	0	0	0
3480	AT1G18250.1	Pathogenesis-related thaumatin superfamily protein	1	1	243	1	0	0
3481	AT1G18250.2	Pathogenesis-related thaumatin superfamily protein	1	1	244	1	0	0
3482	AT1G18260.1	HCP-like superfamily protein	2	3	678	0	0	0
3483	AT1G18265.1	zein-binding protein (Protein of unknown function%2C DUF593)	2	2	280	0	1	0
14437	AT2G17930.1	Phosphatidylinositol 3- and 4-kinase family protein with FAT domain-containing protein	2	8	3858	0	0	2579
14779	AT2G20050.1	protein phosphatase 2C and cyclic nucleotide-binding/kinase domain-containing protein	3	8	1094	0	0	0
14780	AT2G20050.2	protein phosphatase 2C and cyclic nucleotide-binding/kinase domain-containing protein	3	8	1091	0	0	0
3487	AT1G18270.4	ketose-bisphosphate aldolase class-II family protein	2	4	1314	0	0	315
3491	AT1G18310.1	glycosyl hydrolase family 81 protein	4	4	649	0	1	370
3493	AT1G18330.1	Homeodomain-like superfamily protein	3	3	346	0	0	74
3494	AT1G18330.2	Homeodomain-like superfamily protein	3	3	372	0	0	100
3495	AT1G18335.1	Acyl-CoA N-acyltransferases (NAT) superfamily protein	1	1	269	0	0	0
3496	AT1G18335.2	Acyl-CoA N-acyltransferases (NAT) superfamily protein	1	1	277	0	0	0
3497	AT1G18335.3	Acyl-CoA N-acyltransferases (NAT) superfamily protein	1	1	277	0	0	0
3498	AT1G18340.1	basal transcription factor complex subunit-like protein	2	2	301	0	0	81
3499	AT1G18350.1	MAP kinase kinase 7	3	3	307	0	0	63
[truncated: 24,665 more rows]
